# Genetic architecture of collective behaviors in zebrafish

Wenlong Tang<sup>a\*</sup>, Guoqiang Zhang<sup>a\*</sup>, Fabrizio Serluca<sup>a</sup>, Jingyao Li<sup>a</sup>, Xiaorui Xiong<sup>a</sup>, Matthew Coble<sup>a</sup>, Tingwei Tsai<sup>a</sup>, Zhuyun Li<sup>a</sup>, Gregory Molind<sup>a</sup>, Peixin Zhu<sup>a</sup> & Mark C. Fishman<sup>b‡</sup>

<sup>a</sup>Novartis Institutes for Biomedical Research, Chemical Biology & Therapeutics, 181 Massachusetts Avenue, Cambridge, MA 02139, U.S.A.

<sup>b</sup>Harvard University, Dept. of Stem Cell and Regenerative Biology, 7 Divinity Avenue, Cambridge, MA 02138, U.S.A.

\*These authors contributed equally to this work.

‡Corresponding author: M.C.F.: [Mark\\_fishman@harvard.edu](mailto:Mark_fishman@harvard.edu)

**Abstract** Collective behaviors of groups of animals, such as schooling and shoaling of fish, are central to species survival, but genes that regulate these activities are not known. Here we parsed collective behavior of groups of adult zebrafish using computer vision and unsupervised machine learning into a set of highly reproducible, unitary, several hundred millisecond states and transitions, which together can account for the entirety of relative positions and postures of groups of fish. Using CRISPR-Cas9 we then targeted for knockout 35 genes associated with autism and schizophrenia. We found mutations in three genes had distinctive effects on the amount of time spent in the specific states or transitions between states. Mutation in *immp2l* (inner mitochondrial membrane peptidase 2-like gene) enhances states of cohesion, so increases shoaling; mutation in the Nav1.1 sodium channel, *scn1lab*<sup>+/-</sup> causes the fish to remain scattered without evident social interaction; and mutation in the adrenergic receptor, *adra1aa*<sup>-/-</sup>, keeps fish close together and retards transitions between states, leaving fish motionless for long periods. Motor and visual functions seemed relatively well-preserved. This work shows that the behaviors of fish engaged in collective activities are built from a set of stereotypical states. Single gene mutations can alter propensities to collective actions by changing the proportion of time spent in these states or the tendency to transition between states. This provides an approach to begin dissection of the molecular pathways used to generate and guide collective actions of groups of animals.

## Introduction

Darwin recognized that survival depends not only upon the attributes of individuals but also upon coordination of larger groups, such as schools of fish, flocks of birds, and armies of ants (Darwin, 1871). The benefits of collective movement include improved predator avoidance (Ioannou, Guttal, & Couzin, 2012; Ioannou, Morrell, Ruxton, & Krause, 2009), foraging success (Krause, Hartmann, & Pritchard, 1999; Torney, Berdahl, & Couzin, 2011), and reduction in energy consumption due to favorable local currents for fish and birds (Krause,

41 1994; Spedding, 2011). It is not known whether and how genetic changes in  
42 individuals affect group dynamics.

43

44 The schooling, shoaling, and other collective dynamics of fish have been  
45 beautifully described (Jolles, Boogert, Sridhar, Couzin, & Manica; Katz,  
46 Tunstrom, Ioannou, Huepe, & Couzin, 2011; Tunstrom et al., 2013). It appears  
47 that the sometimes rapid changes in direction and mode result from propagation  
48 of local interactions (Katz et al., 2011). The dynamics can be mathematically modelled  
49 as self-propelled particles subjected to forces such as attraction, repulsion, and  
50 alignment (Katz et al., 2011; Lukeman, Li, & Edelstein-Keshet, 2010; Sumpter,  
51 2010). No genes regulating such forces have been identified, although QTL linkage  
52 analysis suggests that schooling at least is under genetic control (Greenwood,  
53 Wark, Yoshida, & Peichel, 2013).

54

55 Machine learning has begun to make more tractable the studies of complex  
56 behaviors (Anderson & Perona, 2014), such as *C. elegans* foraging (Greene,  
57 Brown, et al., 2016), hydra basal behaviors (Han, Taralova, Dupre, & Yuste,  
58 2018), *Drosophila* mating and aggression (Dankert, Wang, Hoopfer, Anderson, &  
59 Perona, 2009; Kabra, Robie, Rivera-Alba, Branson, & Branson, 2013; Kravitz &  
60 Huber, 2003), and mouse social behaviors (Hong et al., 2015; Kabra et al., 2013;  
61 Wiltschko et al., 2015). Unsupervised machine learning approaches, in particular,  
62 have the power to capture unknown patterns with as few *a priori* assumptions as  
63 possible (Todd, Kain, & de Bivort, 2017), and are widely used in pattern learning,  
64 (Feng et al., 2017; Todd et al., 2017) even in cases where data is dense and not  
65 readily separable (Chuang, Tzeng, Chen, Wu, & Chen, 2006; Siew, 2013).

66

67 Here we have found that unsupervised machine learning can describe fairly  
68 completely the collective motion of groups of adult zebrafish as a set of 17  
69 stereotypical states and transitions between states. (Although most studies of  
70 zebrafish behavior use larvae (Baier, 2000; Brockerhoff et al., 1995; Friedrich,  
71 Jacobson, & Zhu, 2010; Granato et al., 1996; Muto et al., 2005; Portugues & Engert,  
72 2009; Rihel et al., 2010; Zhu et al., 2009), we had to use adult fish because we found  
73 robust social behaviors developed late.) We mutated by CRISPR-Cas9 35 genes  
74 linked to human disorders of social behavior, such as autism and schizophrenia,  
75 with the hope that these genes might play a conserved social behavioral role  
76 through evolution. Overall these mutations did not completely add or delete states.  
77 Three mutations in particular, however, changed overall usage of states or  
78 transitions, with dramatic and consistent effects upon the collective group  
79 dynamics.

80

## 81 Results

82 We first defined patterns of wild-type behavior. We find that the collective activity  
83 became more robust and the behavioral repertoire expanded as the animals grew  
84 (Supplemental Figure 1), so it was essential for our studies to use adult fish, at  
85 least 3 months of age. We tracked groups of adult fish by continuous video  
86 monitoring over half hour assays in an environmentally sheltered tank. As shown  
87 in the video attached to Figure 1 (Supplemental Video 1), wild-type fish tend to  
88 swim continuously and dynamically in relatively tight groups.

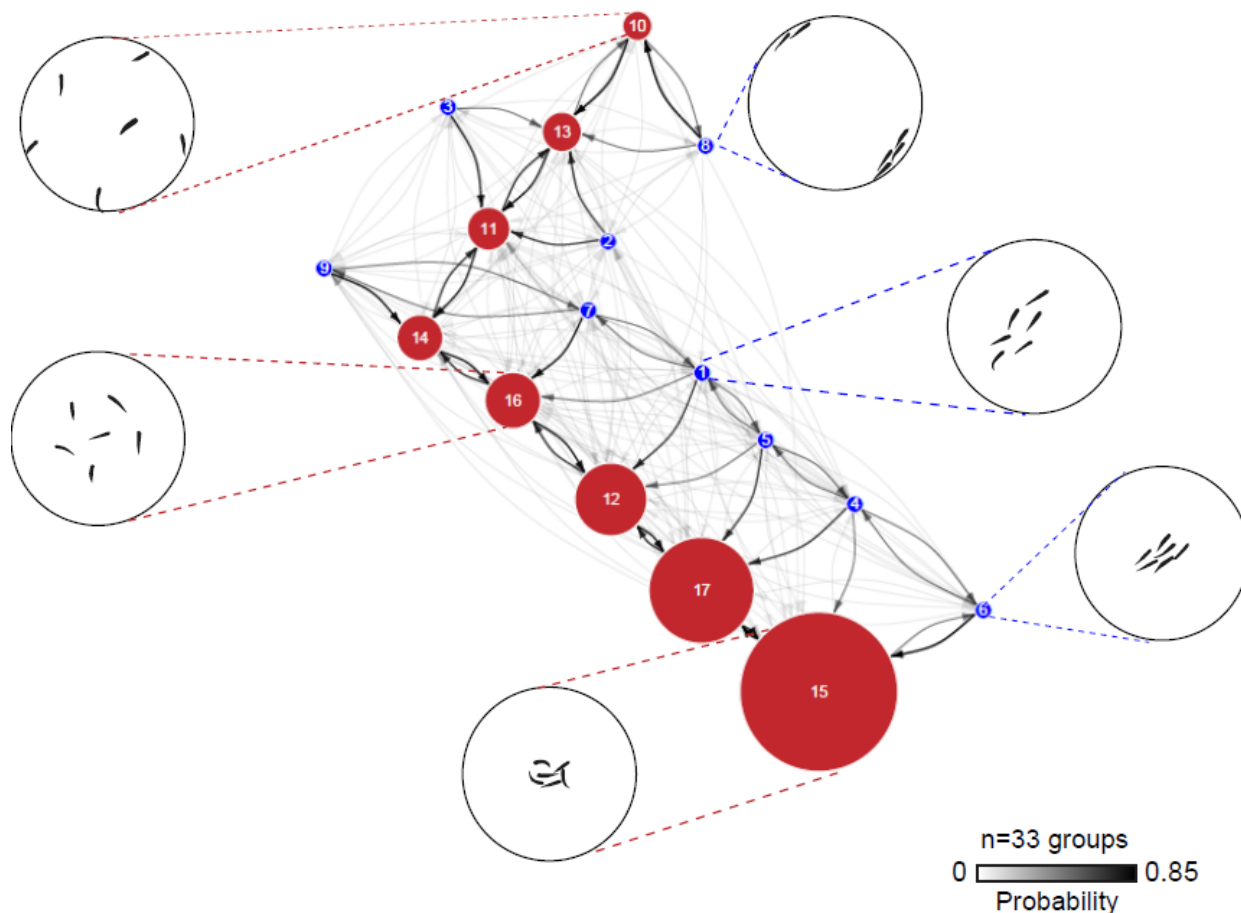

89

90 **Figure 1.** Ethogram of collective behavior in wild-type fish. Circle sizes  
91 correspond to state usage ratios, and density of arrows to transition probabilities,  
92 with polarized states in blue and unpolarized states in red (n= 33 groups).  
93 Dendrogram of state usage is shown in Supplemental Figure 2. Schematic  
94 representations (not to scale) of selected states from both categories are shown as  
95 blow-ups.

96

97 Description of collective activity

98 Ethograms are convenient ways to display the amount of time spent in each state as

99 well as the probability of transition between states (Anderson & Perona, 2014;  
100 Dankert et al., 2009). The ethogram of group behavior of wild-type fish is shown  
101 in Figure 1. Each circle represents a different state (with selected examples shown  
102 in blow-ups). For clarity, we have subdivided polarized (school) states (blue) from  
103 unpolarized (shoal) (red). The thickness of arrows shows transition probabilities  
104 between states. Certain states and transitions are used far more frequently than  
105 others (Supplemental Figures 2 and 3). The mean time spent in each state as a  
106 block is 0.78 seconds (Supplemental Figure 4). In this assay, fish spend far more  
107 time shoaling than schooling, and generally in more cohesive shoals, as shown by  
108 the prominence of states in the lower portion of the ethogram.

109

## 110 Mutations

111 For mutational analysis, we elected to mutate genes putatively related to autism or  
112 schizophrenia (Supplemental Table 1 and 2) because of the profound defects in  
113 social behavior that characterize these disorders, with the hope that their roles in  
114 social behaviors might be evolutionarily conserved, even if the behaviors  
115 themselves are species-specific. In order to provide sufficiently accurate  
116 information for design of effective CRISPR-Cas9 guide RNAs, we found it  
117 necessary to sequence and reassemble the complete genome of the AB strain (data  
118 available upon request).

119

120 We generated mutations in 35 genes (Supplemental file 1) and screened for  
121 changes to collective behavior in adult fish homozygous for the mutation (with the  
122 exception of *scn1lab* and *slc18a2* which were not viable as homozygous animals  
123 so were evaluated as heterozygous animals). Behavior for each mutation was  
124 quantified on ethograms generated as above, and then all 35 compared to wild  
125 type AB. Using the Kullback-Leibler divergence approach (Kullback & Leibler,  
126 1951) we identified three mutations with particularly distinctive behavioral  
127 changes. Differences from wild-type were cross-validated by multi-class Support  
128 Vector Machines (SVM) (Supplemental Figure 5), and finally assessed by human  
129 expert validation using double blinded datasets. The ethograms for these three  
130 mutant fish are shown in Figure 2 and 3, along with exemplary videos. Some other  
131 mutations changed state usage in manner similar to the three described, but to a  
132 lesser degree (Supplemental Figure 6).

133

134 *Enhanced cohesion* Fish mutant in the inner mitochondrial membrane peptidase 2-  
135 like gene, *immp2l*<sup>-/-</sup>, tend to aggregate tightly in small shoals, as shown in the  
136 video attached to Figure 2b (Supplemental Video 2). The increased shoaling is  
137 reflected in enhancement of two tight cohesion states in the lower part of the



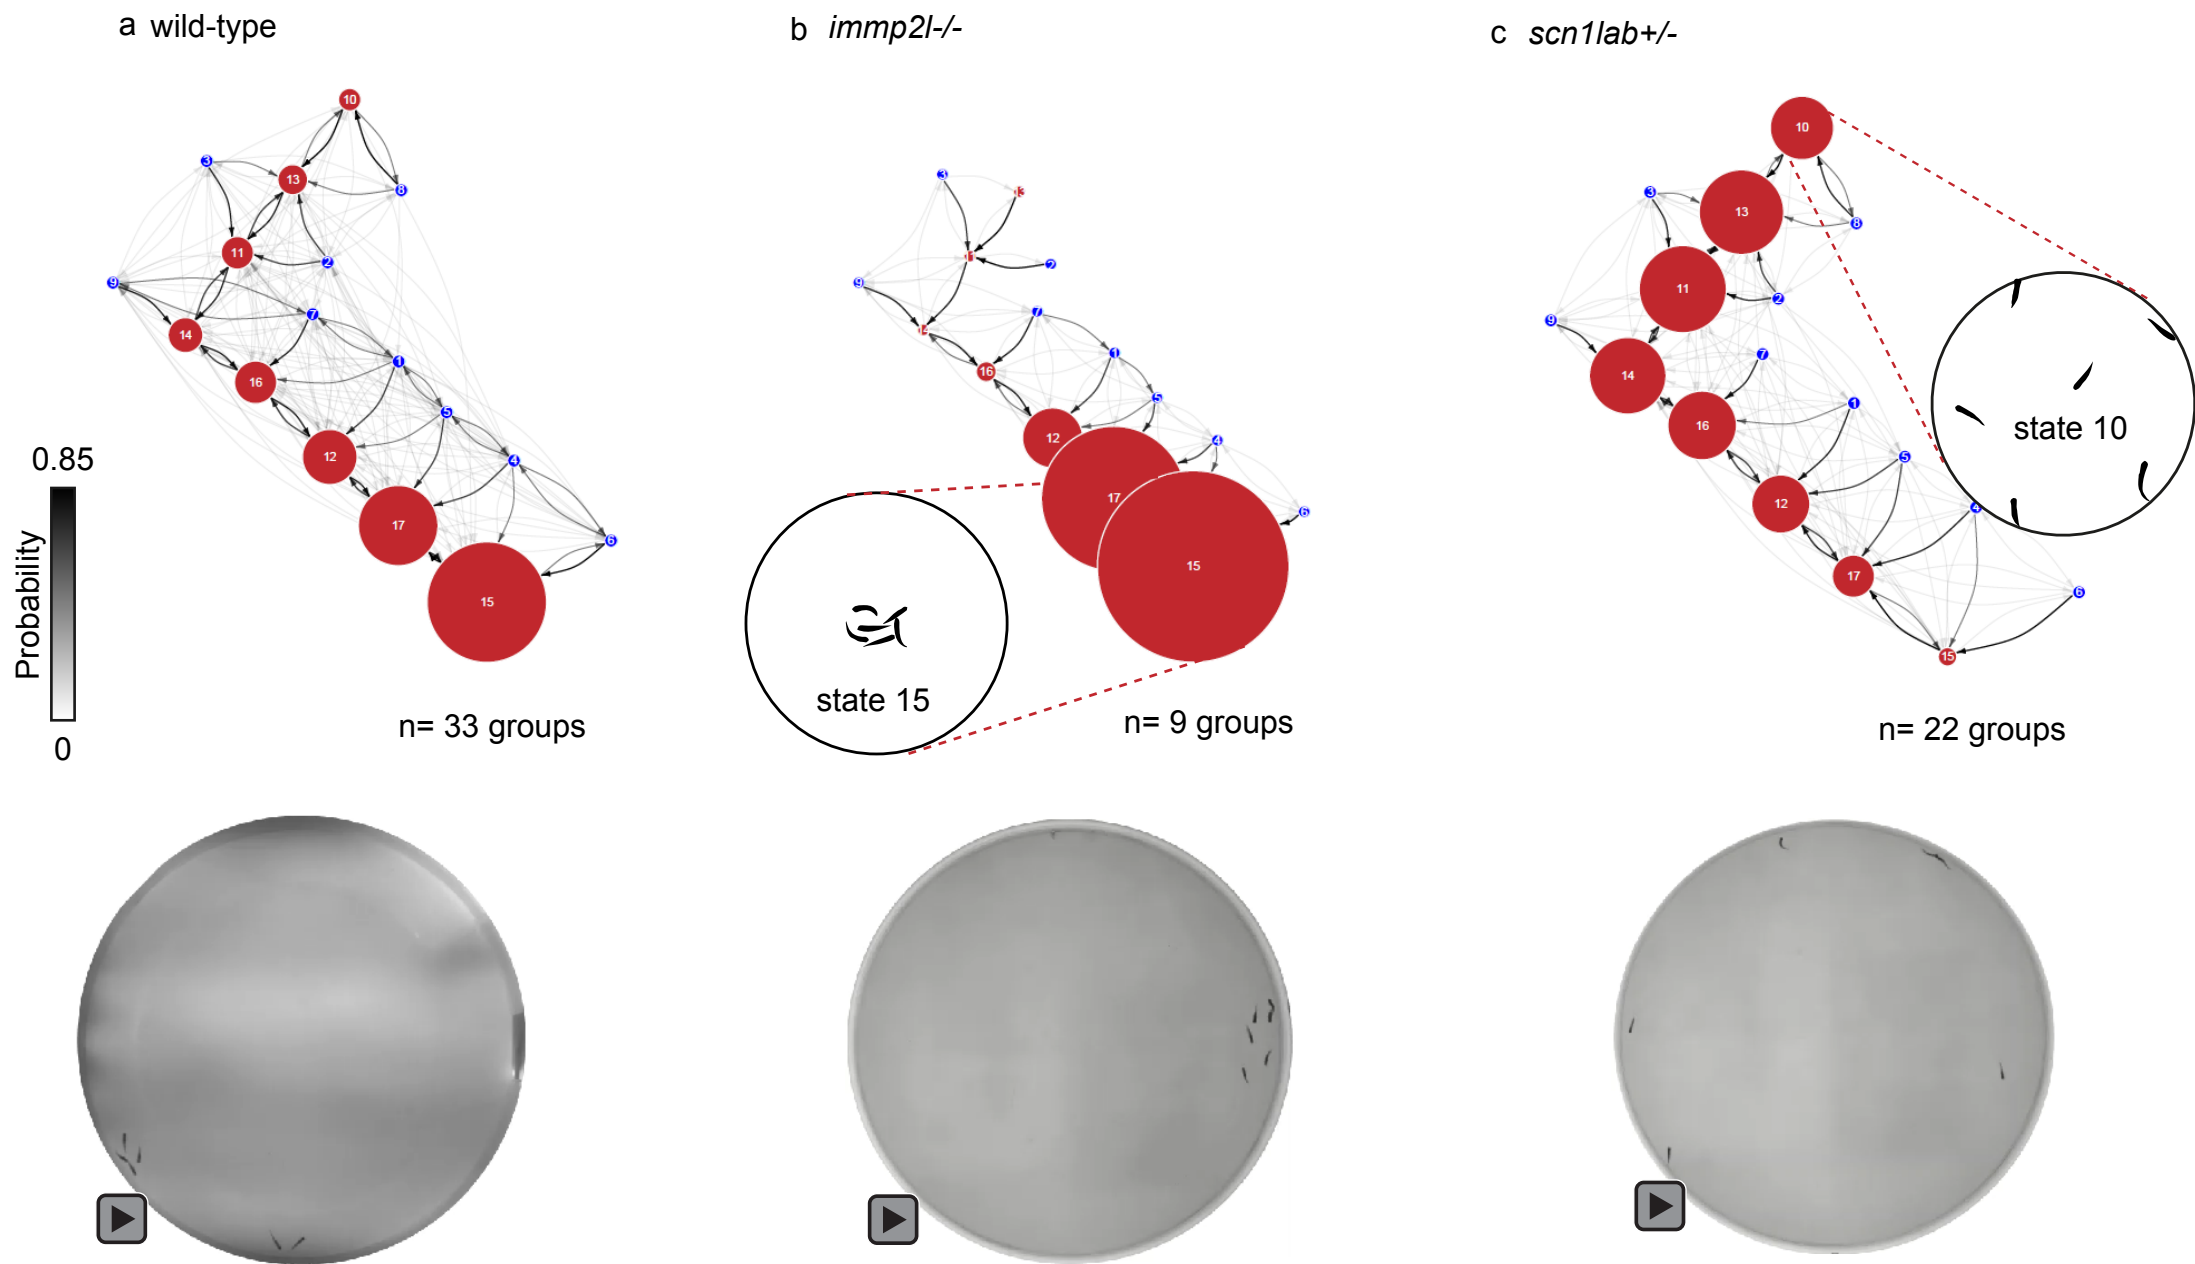

**Figure 2.** Ethograms of (a) wild-type fish; (b) *imp21*<sup>-/-</sup> mutant fish, showing enhanced cohesion (note that dispersed polarized state 8 and unpolarized state 10 are missing); (c) *scn1lab*<sup>+/-</sup> mutant fish, showing enhanced dispersion. Videos can be accessed by clicking where shown, or via Supplemental Video 1 (wild-type), Supplemental Video 2 (*imp21*<sup>-/-</sup>), and Supplemental Video 3 (*scn1lab*<sup>+/-</sup>). Usage ratios are quantified in Supplemental Figure 3 and 4. (wild-type, n=33 groups; *imp21*<sup>-/-</sup>, n=9 groups; *scn1lab*<sup>+/-</sup>, n=22 groups). Color bar indicates transition probability: [0 0.85].

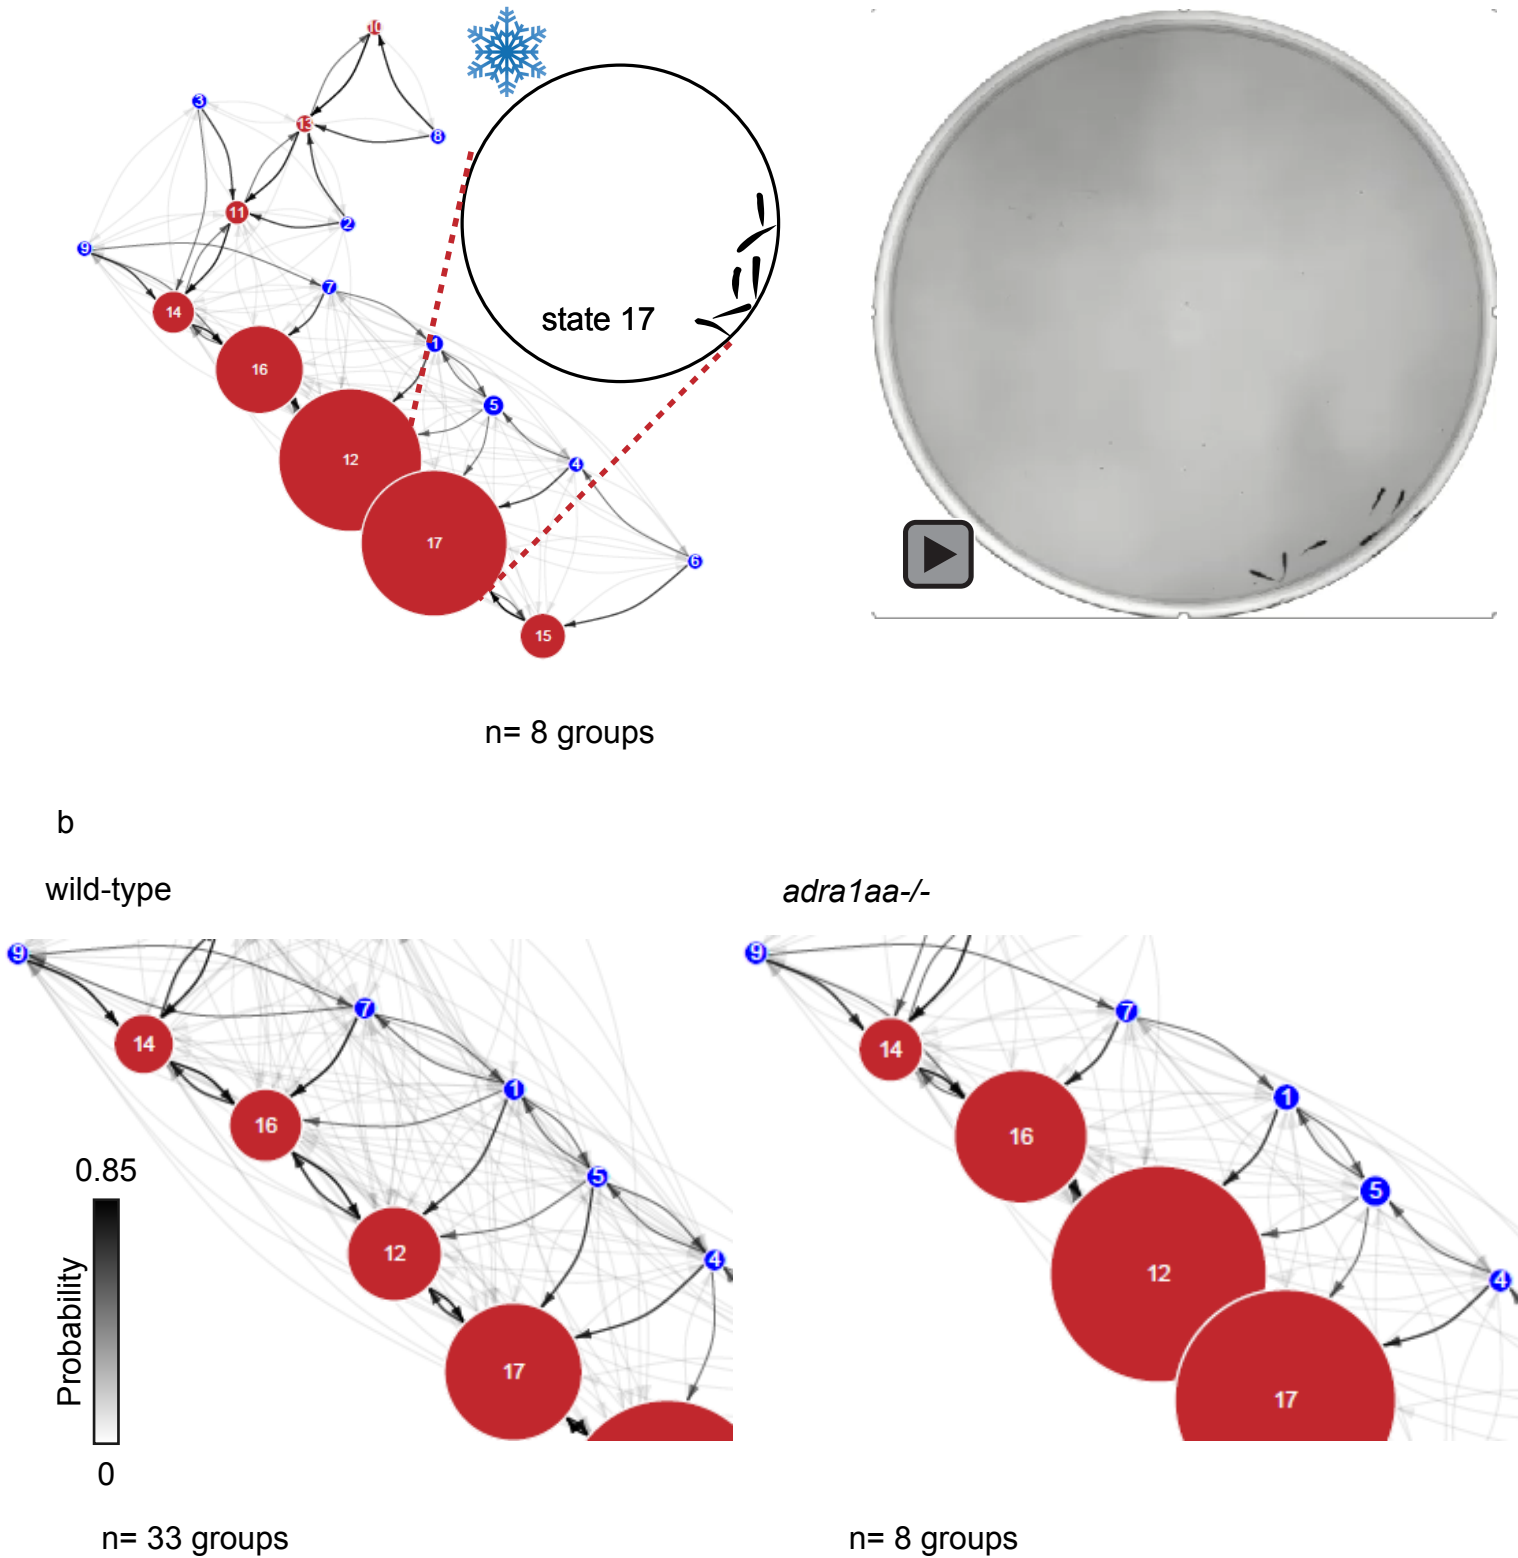

**Figure 3.** (a) Ethogram of *adra1aa*<sup>-/-</sup> mutant fish (n = 8 groups) showing reduced transitions. Video (Supplemental Video 4) is clickable, and shows bouts of "freezing". (b) blow-ups of the lower part of the ethograms, comparing wild-type to *adra1aa*<sup>-/-</sup> fish, to illustrate the relative paucity of transitions between states of *adra1aa*<sup>-/-</sup> fish. Color bar indicates transition probability: [0 0.85].

138 ethogram of Figure 2b (n=9 groups,  $p < 0.001$ ; Mann-Whitney U-test;  
139 Supplemental Figure 6a). This is the only mutation to completely abolish  
140 individual states (states 8 and 10 are missing). In the contrast with *scn1lab*<sup>+/-</sup>-the  
141 two missing states are the most dispersed polarized and unpolarized states. The  
142 fish can move dynamically between the limited states, and rarely polarize (usage  
143 ratios shown in Supplemental Figure 3). Cross validation of this robust phenotype  
144 was performed by multi-class SVM (Prediction Accuracy (PA) =0.95; Leave-One-  
145 Out; Supplemental Figure 5). These fish feed well and spawn (Figure 4), and in  
146 the home tank movements are indistinguishable from normal.

147  
148 *Enhanced dispersion* Fish mutant in the Nav1.1 sodium channel, *scn1lab*<sup>+/-</sup>,  
149 remain dispersed throughout the chamber, rarely aggregating, as shown in Figure  
150 2c and its attached video (Supplemental Video 3). This is represented by the shift  
151 in predominant states of the ethogram to states to the upper right compared to wild-  
152 type (n=22 groups;  $p < 0.001$ ; Mann-Whitney U-test; Supplemental Figure 6b). In  
153 fact, the states lost in *immp2l*<sup>-/-</sup> (states 8 and 10) are enhanced in *scn1lab*<sup>+/-</sup>.  
154 Cross validation of this robust phenotype was performed by multi-class SVM  
155 (PA=0.88; Leave-One-Out; Supplemental Figure 5). The group centroid speed,  
156 pairwise distance, and polarization have little correlation with each other  
157 (Supplemental Figure 7). The fish feed, spawn and grow normally.

158  
159 *Enhanced freezing* Fish mutant in the adrenergic receptor, *adralaa*<sup>-/-</sup>, have many  
160 more periods of inactivity than do wild-type, especially towards the end of the  
161 half hour test. The state usage of the selected top two states for each comparison  
162 is not very distinct from wild type (n=8 groups; Tight shoaling:  $p = 0.59$ ; Medium  
163 schooling:  $p = 0.86$  and Dispersion:  $p = 0.07$ ; Supplemental Figure 6a-b) as shown  
164 in Figure 3a. Compared to wild-type, *adralaa*<sup>-/-</sup> mutant fish tend to have  
165 significantly more “freeze” motifs in the last third of the recording time ( $p < 0.001$ ),  
166 as shown in Supplemental Figure 6c. . This difference in dynamics is shown by the  
167 relative paucity of arrows in the ethogram blow up of Figure 3b and the attached  
168 video (Supplemental video 4). Cross validation of this robust phenotype was  
169 performed by multi-class SVM (PA=0.92; Leave-One-Out; Supplemental Figure  
170 5). The fish feed and spawn normally, and their behavior in the home tank is  
171 indistinguishable from wild-type.

172  
173 *Effects on other behaviors*

174 We were curious as to whether the mutations that perturb collective activity also  
175 markedly affect motor control or vision. In terms of motor function, we measured  
176 speed, the frequency of acceleration, and turns of individual fish in mating

177 behavior. The three mutations with collective behavioral phenotypes noted above  
178 can reach the same level or even higher in all three motion measurements  
179 compared to wild type fish. We explored mating, another social behavior, a dance  
180 with strong and close proximate interactions, on the assumption that subtle visual or  
181 motor defects would perturb the effectiveness of this rapid and highly stereotyped  
182 interaction (Nasiadka & Clark, 2012; Spence, Gerlach, Lawrence, & Smith, 2008). It  
183 also has a quantitative output, i.e., number of fertilized eggs. The spawning  
184 consequences of the mutations were modest, *immp2l*<sup>-/-</sup> and *adra1aa*<sup>-/-</sup> slightly  
185 increasing and *scn1lab*<sup>+/-</sup> slightly reducing spawning (Figure 4). Hence the genes  
186 that dictate collective behavior have only modest effects on the individual  
187 behaviors or mating capabilities that we measured.

a

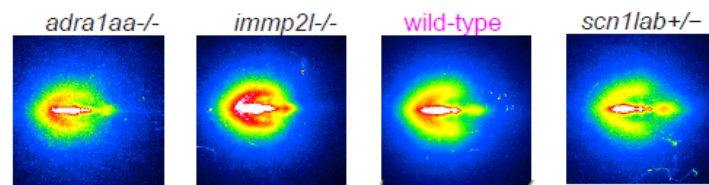

b

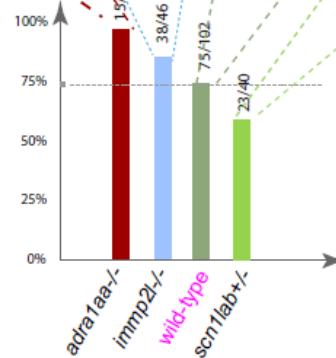

188 **Figure 4.** Courtship and spawning is relatively preserved in mutant fish. (a)  
189 Positional maps of chasing behavior, with female fish centered facing right and  
190 male fish chasing position frequency plotted as a heat map, shows chasing  
191 behavior is relatively retained in the mutations of interest. (b) Success of courtship  
192 behaviors from mutants and wild-type ranked by the ratio of pairs yielding  
193 fertilized embryos, showing modest effects on spawning of the mutations of  
194 interest.  
195

196

## 197 Discussion

198 Darwin (Darwin, 1871) and Tinbergen (Tinbergen, 1952) speculated as to why

199 some species live in groups and others as solitary animals. Presumably, the  
200 benefits of living and moving in a collective provide some advantages (Couzin,  
201 2009; Sumpter, 2010). It is believed that fish school and birds flock in part to help  
202 avoid or confuse predators, to improve foraging, and to reduce energy expenditure,  
203 especially during long haul migration. But such activities come at a cost to  
204 individuals, for example, the need to share food and the exposure of those  
205 positioned on the edge of the school to attack (Krause, 1994). Hence, how group  
206 activity has arisen through evolution, where selection acts on the genome of the  
207 individual, has been a source of intense debate.

208

209 Here we show that collective behavior is stereotypical and can be described as the  
210 consequence of time spent in, and transitions between, 17 different states, each lasting  
211 around. By clustering cost curve (Supplemental Figure 8b), we found these were the  
212 fewest number of states needed to define the full repertoire of collective actions for wild-  
213 type and mutant fish.

214

215 We found that single gene changes can modify collective activity in interpretable  
216 manner, using the same states. In other words, mutations did not add states. Mutation in  
217 the mitochondrial membrane peptidase 2-like gene *immp2l* increases the tendency  
218 to aggregate in tight cohesion, and caused the loss of two highly dispersed states.  
219 Mutation in the sodium channel Nav1.1 gene *scn1lab* appears to prevent any  
220 group interaction, abolishing cohesion and polarization. Mutation in the  
221 adrenergic receptor gene *adra1aa* reduces the transitions between states, and  
222 causes the animals often to freeze. Freezing and tight cohesion both are seen as  
223 responses to threat and conspecific injury (Chicoli & Paley, 2016; Faustino,  
224 Tacao-Monteiro, & Oliveira, 2017; Rennekamp et al., 2016).

225

226 It is noticeable that these effects correspond to some of the forces (repulsion,  
227 attraction, and spontaneity) applied to individual particles in mathematical models  
228 to generate coordinated movements of groups (Katz et al., 2011; Krause et al.,  
229 1999; Li & Xiao, 2010; Sumpter, 2010). (We have not seen, so far, mutations with  
230 selective effects on polarization, a fourth such force). In these models, individual  
231 fish need only to manifest these forces between immediate neighbors for the  
232 larger scale behavior to emerge as a consequence.

233

234 One might argue that widespread changes in neural function could affect a range  
235 of behaviors. Although we cannot rule out subtle changes in these parameters,  
236 these mutations did not dramatically affect vision or motor function. Of course,



237 other sensory cues might be changed, such as pheromones, so critical to mating  
238 (Spence et al., 2008; Yabuki et al., 2016) and to aggregation and dispersion of *C.*  
239 *elegans* (Greene, Dobosiewicz, Butcher, McGrath, & Bargmann, 2016). However,  
240 mating remains intact, in terms both of the ornate dance and number of fertilized  
241 eggs produced, and we noted no deficiencies in feeding. We also recognize that  
242 different environments will elicit distinct behaviors, as will other variables, such as  
243 numbers of fish participating (Tunstrom et al., 2013; Yates et al., 2009) and  
244 familiarity of the fish with the test chamber. In our studies, the assay was done on  
245 fish which had never experienced the test chamber before.

246  
247 To our knowledge these are the first genes shown to regulate group collective  
248 behavior in vertebrates. Some of these have been analyzed for effects in mice, but  
249 for other attributes. A mutation in the Inner Mitochondrial Membrane Peptidase  
250 2-Like Gene (*immp2l*) reduces fertility (Lu et al., 2008). One where there is some  
251 similarity is haploinsufficiency of the voltage-gated sodium channel, Nav1.1 (Han  
252 et al., 2012), which causes hyperactivity and loss of preference for another mouse  
253 over empty chambers and curiosity about a novel mouse.

254  
255 We selected these genes for mutation because they have been reported, with  
256 differing degrees of certainty, to have genetic association with autism and  
257 schizophrenia, disorders marked by impairments in social interaction. Rare  
258 genetic mutations of the *IMMP2L* gene have been identified in Tourette  
259 syndrome and autism spectrum disorders (ASD), and this gene is in the 7q31  
260 translocation region of a Tourette syndrome cohort (Bartnik et al., 2012; Petek et  
261 al., 2001). Haploinsufficiency of Nav1.1 in human causes Dravet syndrome, with  
262 autism preceded in infancy by seizures. The gene for the adrenergic receptor  
263 *ADRA1A* is in a large genomic region associated with autism, but no behavioral  
264 role has previously been speculated.

265  
266 Of course, whether these mutations are good models for behavioral deficits in  
267 humans remains to be seen. Heterozygous mutation of Nav1.1 in humans, fish,  
268 and mice all reduce social interactions. But with the exception of Nav1.1, we  
269 have evaluated homozygous effects of mutations, while in humans the mutations  
270 are studied in patients with heterozygous deficiencies. To the extent there is  
271 duplication of function that accompanies the duplication of many genes in teleost  
272 compared to humans or mice (Meyer & Schartl, 1999; Sztal, McKaige, Williams,  
273 Ruparelia, & Bryson-Richardson, 2018) certain effects may be compensated. In  
274 fact, *adra1a* is split into *adra1aa* and *adra1ab*, knockout of each which causes  
275 enhanced freezing, suggesting that there may be duplication of function and

276 compensation. This may also explain why certain candidate autism genes with  
277 striking behavioral disturbances when knocked out in mice, such as *dlg4a* and  
278 *shank3b* (Feyder et al., 2010; Peca et al., 2011), have less striking phenotypes in  
279 the fish. Additionally, our assays observe only a small biopsy of potential  
280 collective activities under specific controlled circumstances. Nonetheless,  
281 zebrafish are amenable to chemical screens for restoration of mutant to normal  
282 phenotype (Peterson et al., 2004),

283  
284 It seems remarkable that some of the genes we discovered here to regulate  
285 collective behavior of fish also have been proposed to affect social behavior of  
286 humans. This suggests that, perhaps, the role of genes for social behavior, writ  
287 large, is conserved through evolution, of course playing out distinctively in  
288 different species. The relative convenience of the fish for therapeutic compound  
289 screening (Peterson et al., 2004), may be used to advantage in phenotypic screens for  
290 reparative agents for disorders such as autism and schizophrenia.

## 291 **Materials and methods:**

292

### 293 **Animals**

294  
295 Zebrafish (*Danio rerio*; AB strain) were housed with mixed gender in 3L tanks on  
296 a recirculating Aquatic Habitats facility (Custom design, Pentair, USA). The fish  
297 were kept at a density of 12 fish per 3L tank. Facility water temperature was kept  
298 at  $28\pm 0.5^{\circ}\text{C}$ , and water sourced from deionized water conditioned with sodium  
299 bicarbonate (Catalog #SC12-Pentair, USA) and Instant Ocean sea salt (Catalog  
300 #IS160-Pentair, USA) to a pH of  $7.2\pm 0.5$  and conductivity of  $420\pm 50\ \mu\text{S}$ . Fish  
301 were maintained on a 14-hour light/10-hour dark cycle with light turning on at  
302 07:00 AM. Fish were fed a diet of brine shrimp (Catalog #BSEPCA-Brine Shrimp  
303 Direct, USA) twice daily and supplemented with flake fish food (Tetramin  
304 Catalog# 98525-Pentair, USA) every other day. All animals were maintained and  
305 procedures were performed in accordance with the Institutional Animal Care and  
306 Use Committees (IACUC) of NIBR.

307

### 308 **Genome-wide CRISPR-Cas9 sgRNA design**

309

310 Because the current work was carried out in the AB strain and the public genome  
311 assembly (GRCz11) is based on TU strain, we established a new genome  
312 assembly for the AB strain (unpublished, sequences available upon request). For  
313 designing CRISPR/Cas9 sgRNAs, we re-trained sgRNA-efficiency models using  
314 Random Forest and Naïve Bayes methods based on previously published  
315 sgRNAs. 1280 sgRNAs sequences and their editing efficiencies were obtained

316 from previous study in TU-strain by Moreno-Mateos, M. A. et al., (Moreno-  
317 Mateos et al., 2015), and mapped to the AB genomic sequence. About 150  
318 features were used to train the two Machine Learning models, Random Forest and  
319 Naïve Bayes, in classification mode, including genomic strand of sgRNA, GC%,  
320 identity of  $\pm 4$  bp of sgRNA targeting sequence, thermodynamics parameter,  $\Delta G$   
321 of sgRNA-genomic DNA heteroduplex for sliding windows of different sizes  
322 (Sugimoto, 1995), the free-energy of stem-loops 1, 2, and 3, tetraloop, repeat-anti  
323 repeat and linker structures of the full-length sgRNA predicted by UNA-fold  
324 (Hiroshi Nishimasu, 2014; Markham & Zuker, 2008) and etc. A training accuracy  
325 of  $> 0.7$  was achieved by both models, and the efficacies of all sgRNAs in the AB  
326 genomic sequence was predicted. Guide RNAs with high predicted efficacy were  
327 selected to target the 5' end of the coding exons or Pfam domains of the genes in  
328 current study (for the full gene list, citations for disease indications, please see  
329 Supplemental. Table 1 and for the guide RNA sequences used for CRISPR-cas9,  
330 please see Supplemental. Table 2).

331

### 332 **Micro-injections, CRISPR/Cas9 mutant founder identification**

333

334 sgRNAs were synthesized using T7 *in vitro* transcription using the  
335 MEGAshortscript™ T7 Transcription Kit (ThermoFisher, AM1354).  
336 Cas9/sgRNAs were co-injected into 1-cell stage fertilized zebrafish embryos.  
337 Conditions were optimized to maximize the CRISPR efficiency in our settings.  
338 High indel rates ( $>90\%$ ) were usually observed in fully developed embryos  
339 injected with 500 ng/ $\mu\text{L}$  Cas9 protein (PNABio, CP01) and 125 ng/ $\mu\text{L}$  sgRNA  
340 purified with MEGAclean™-96 Transcription Clean-Up Kit (ThermoFisher,  
341 AM1909).

342

343 Indel rate in the injected zebrafish were measured using NGS at 2 days post  
344 fertilization (dpf). PCR were performed on the genomic DNA extracted from  
345 zebrafish larvae using the HotSHOT method (Meeker, Hutchinson, Ho, & Trede,  
346 2007), and NGS libraries for PCR products were generated using Nextera DNA  
347 Library Preparation Kit (Illumina, FC-121-1031). Subsequently, Nextera libraries  
348 were sequenced on Illumina MiSeq, and  $> \text{avg. } 2000$  reads for each amplicon  
349 were obtained. Sequencing reads were mapped to the reference sequence using  
350 BLAT (Kent, 2002), and indels were extracted from the .psl file using a  
351 bioinformatic pipeline developed in-house (available upon request). The gene  
352 editing efficiency in the injected embryos were calculated as the maximum indel  
353 rate within the  $\pm 30$  bp regions of PAM sites.

354

355 We usually sequence five larvae per CRISPR injected clutch to confirm the gene

356 editing efficiency. The rest fish of the confirmed clutch were raised to adulthood  
357 and crossed with wild-type AB fish, and founder fish carrying the desired  
358 frameshift mutation were screened from the F1 generation. F1 heterozygotes were  
359 inter-crossed, and homozygotes, if viable, were identified and inter-crossed again  
360 to obtain sufficient gene knockout fish for behavioral assays. Each CRISPR line  
361 was at least an F2 stable line before being run in any assay. All founders and  
362 homozygote identification were carried out using fin-clipping PCR, and  
363 sequencing the PCR product using NGS as described above. The indel sequence  
364 of homozygous mutations and heterozygous mutations that could not be bred to  
365 homozygous (*scn11ab* and *slc18a2*) are illustrated in Supplementary File 1, and  
366 also the predicted protein sequence aligned with that of the wild-type fish.

367

### 368 **Experiment setup for behavioral assays**

369

370 Attention was paid to ensure fish gender balance and matching of size and age,  
371 and to conduct experiments at similar times of days and feeding cycle, and to  
372 monitor by video without human presence. All behavioral rooms were fed with  
373 water directly from the main fish facility and room temperature and light cycle  
374 was consistent with the main facility. The behavioral setups consisted of 20”  
375 diameter acrylic circular arena (Custom Design: Acrylic Tank – Clear – 20” OD x  
376 19.25” ID x 8” height – Open Top, Plastic Supply, Inc., USA) filled to a depth of  
377 1 3/4” (~9 L total volume) with system water fed directly from the main housing  
378 unit to ensure all water parameters were identical to the housing conditions. The  
379 circular arenas were coated on the outside (I00810, Frosted Glass Finish, Krylon,  
380 USA) to prevent the fish from being able to see outside of the arenas but to allow  
381 IR light transfer. Underneath the tanks were 24 inch adjustable IR panels (with  
382 940 nm IR LEDs made by Shenzhen VICO). Basler Ace 2040-90um Near  
383 Infrared (NIR) cameras (Order#-106541, Graftek Imaging, USA) were mounted  
384 23 inches above the arena to collect a dorsal view of the fish. Infrared long pass  
385 filters (Midopt LP780-62, Graftek Imaging, USA) were attached to the lens  
386 (Scheider Cinegon 1.9, Graftek Imaging, USA) and were set to an aperture of 6  
387 (Supplemental Figure 9a). All trials were recorded after 10 minutes habituation to  
388 allow recovery from any stress due to netting. Briefly, shoaling assays were run  
389 with six fish (3 males and 3 females), which were randomly combined from  
390 multiple tanks of siblings (with the exception of *chd8*<sup>-/-</sup> which had only male  
391 homozygous animals so were paired with 3 AB females) (Supplemental Figure  
392 9c). Each trial was a recording of 30 min at 60 fps. Arenas were rinsed clean with  
393 system water at the end of the day and put through a cabinet washer (Type:  
394 9LAV65, IWT Tecniplast Inc., Italy) once a week on a hot water only cycle.

395

396 Courtship assays (1 male and 1 female) were all conducted in Aquatic Habitat 2L  
397 group mating tanks (Catalog# Breeder2-Pentair, USA) positioned carefully within  
398 arenas used for the above shoaling assays (Supplemental Figure 9b). The main  
399 arena was still filled with water to ensure all fish's safety as they infrequently  
400 escape the mating tanks, which remain lidless due the need to eliminate optical  
401 obstructions. Image size was fitted to exactly cover the two tanks in the overnight  
402 assays (Supplemental Figure 9d). Three 30-min videos were recorded for each  
403 pair of animals: the first recording was initiated at 16:00 PM while fish were  
404 separated by a clear divider; the second recording at 22:00 PM while the lights  
405 were off and divider still in place; the third recording was done at 08:00 AM (the  
406 following day) with the divider removed. After each recording, spawning records  
407 were documented and confirmed only if more than 10 embryos survive till 1 dpf  
408 with normal course. All mating tanks used in assays were washed daily in under  
409 counter washers (Type: GG05/Model PG 8583; Miele AG, Germany).

410

### 411 **Automated data collection**

412

413 We used a virtual instrument console designed within LabVIEW (National  
414 Instruments, USA) to control all cameras. The acquisition software was designed  
415 with four prioritized functions: 1) Saving the recorded video; 2) Logging all  
416 relevant metadata accurately and automatically; 3) Enabling real time user  
417 visualization, verification and modification; 4) Generating associated files to  
418 streamline downstream analysis.

419

420 Non-default parameters were set within the NI-MAX (Measurement and  
421 Automation Explorer) including dimensions and offsets for centering (1880x1880  
422 pixels (offset 84/84) for Shoaling assays, 1000x1000 pixels (offset 420/600) for  
423 Courtship assays) and frame rate (60 fps). One workstation (X2D65UT#ABA,  
424 Z440, Hewlett Packard Inc., USA) was dedicated for simultaneous recordings of  
425 two USB3.0 Basler ACE cameras. The resulting videos which are approximately  
426 360 GB each for Shoaling assays, and 108 GB each for Courtship assays are  
427 saved on a local 4x2 TB SSD RAID0 (Samsung EVO 850, B&H Photos Inc.,  
428 USA). All cameras were named uniquely to allow us to trace back which videos  
429 are generated by corresponding setups.

430

431 Relevant metadata includes time of trial, user, and fish information (genetic  
432 background, age, genetic knockouts, genotype, compound treatment  
433 (concentration/duration) and other manipulations), and assay information  
434 (duration, fps, number of male and female fish). All software developed in house  
435 is available upon request, excluding licenses.



436

## 437 **Data preprocessing**

438

439 The processing involved building of fingerprint libraries to distinguish fish  
440 accurately even after repeated crossings, using locomotion quantifications such as  
441 trajectory, angles, speeds, pairwise distances, and convex hull area. (software  
442 based on MATLAB 2013a; MathWorks, U.S.A.) inspired by Perez-Escudero *et*  
443 *al.* (Perez-Escudero, Vicente-Page, Hinz, Arganda, & de Polavieja, 2014). In  
444 addition, we used supervised behavioral annotation of simple motifs, such as  
445 nonsocial turn, dive, rest, and cruise, or social chase, cross, and parallel rotation,  
446 with previously trained classifiers as described by Kabra *et al.* (Kabra et al., 2013).  
447 These processing procedures are integrated into an overarching program that  
448 manages data dependencies to automatically start the next stages when ready  
449 without needing additional user inputs (scripts available upon request).

450

## 451 **Unsupervised collective behavior state hierarchical structure clustering**

452

453 For this analysis we used 5 frame epochs. Polarization was determined by the  
454 swimming direction angle. For the  $i^{th}$  fish in epoch  $n$ , this was represented by the  
455 tangent angle of the  $i^{th}$  fish's trajectory from the 1<sup>st</sup> frame of the  $n^{th}$  epoch to the  
456 1<sup>st</sup> frame of the  $n+1^{th}$  epoch in the Cartesian coordinates where the trajectory was  
457 represented. If the standard deviation of the angles of the six fish in an epoch was  
458 lower than the threshold 0.6 radians and the minimum swimming speed of the 6  
459 fish in the epoch faster than 1 inch per second, the epoch was classified as  
460 "polarized swimming"; otherwise the epoch will be classified as "unpolarized  
461 swimming".

462

463 The pairwise distances among the six fish's centroids was calculated from the 1<sup>st</sup>  
464 frame to represent the pairwise distances in each epoch. The pairwise distances  
465 within each epoch was ranked in a descend order. A principle component analysis  
466 (PCA) dimension reduction was applied to the ranked pairwise distance matrices  
467 (with a dimension of  $C_6^2$  by number of epochs) in polarized swimming and un-  
468 polarized swimming epochs, respectively. The top 2 components that capture  
469 more than 95% of variance were kept and *fuzzy C*-means clustering was  
470 implemented on the top 2 PCA components with  $k=9$  states, for polarized  
471 swimming and  $k=8$  for unpolarized swimming components, respectively. The  
472 flow chart of the unsupervised learning approach we performed is shown in  
473 Supplemental Figure 9a. A majority filter is applied to the clustered labels to  
474 eliminate cases that only a single epoch has a different label from previous epoch  
475 labels and post epoch labels, since there is less interest in super short states with

476 duration less than 1/6 seconds. Change points identified state block duration  
477 distribution is shown in Supplemental Figure 9. The mean of block duration is  
478 0.78 seconds with a standard deviation of 0.96 seconds.

479  
480 A t-distributed stochastic neighbor embedding (t-SNE) (Laurens van der Maaten,  
481 2008) plot was used to visualize the high dimensional data in a two dimensional  
482 space for the wild-type fish collective behavior (Supplemental Figure 10a-b). The  
483 collective behavior pattern is shown by clickable videos for the selected states.

484  
485 The  $k$  values were determined by optimizing the clustering cost (D T Pham, 2005)  
486 (Supplemental Figure 9b). Moreover, to increase the resolution of the state  
487 quantification, the state number was pushed to  $k=50$  for both polarized and  
488 unpolarized swimming. The overall results remain consistent.

489  
490 Self-Organizing map (SOM) clustering and k means were applied as orthogonal  
491 approaches to *fuzzy C-means*. The performance of SOM and k means is  
492 equivalent to *fuzzy C-means* (data not shown). All the quantifications are  
493 implemented in Matlab R2014a (Mathworks. Inc, U.S.A.). Figure 1 to 3 and  
494 supplementary figure 1, 2, 3, 5, and 10 were plotted in R 3.4.1, the rest figures  
495 were plotted in Matlab. Silhouette analysis was performed for both polarized and  
496 un-polarized swimming to ensure no significant over classification (data not  
497 shown). The Matlab and R codes to replot all the figures in this manuscript are  
498 available upon request.

## 499 **Ethogram visualizations**

501  
502 Ethograms are used to represent the different states that occur during collective  
503 behaviors. The ethogram indicates the frequency and transition probability with  
504 which one state is followed by another state (Anderson & Perona, 2014; Dankert  
505 et al., 2009). To represent the relationship among behavioral states and probability  
506 distribution of states using the ethogram, two type of analysis were performed.  
507 First, we computed the one-step transition probability which is the conditional  
508 distribution of the current state given by the previous state (Bishop, 2006).  
509 Second, we computed the probability distribution of states which is the frequency  
510 of the occurrence. In practice, The ethogram is generated by *igraph R* package  
511 (Csardi, 2006). In the ethogram, the edge and vertex are corresponding to the one-  
512 step transition probability and probability distribution of states, respectively. The  
513 thicker and darker the edge is, the higher transition probability is; and the bigger  
514 the vertex is, the higher the state appearance probability is. All attributes (e.g.,  
515 vertex color, vertex size, arrow size, edge size, and edge curvature, provided in

516 the scripts) were adjusted by parameters of the package to generate current  
517 figures.

518

### 519 **Kullback-Leibler divergence**

520 Kullback–Leibler divergence (relative entropy) (Kullback & Leibler, 1951) is a  
521 mathematical method to measure the differences of two probability distributions.  
522 The difference  $D$  is a function of the two discrete probability distributions  $P$  and  
523  $Q$  as shown in the following equation (1):

524

$$525 \quad D(P||Q) = \sum_i P(i) \log \frac{P(i)}{Q(i)} \quad (1)$$

526 Kullback–Leibler divergence was applied to the polarized and unpolarized state  
527 usages, respectively. The differences between each mutation and wild type were  
528 ranked in descending order (Supplementary File 2) and the top ranked mutations  
529 were selected.

530

### 531 **Supervised behavioral phenotype category classification**

532

#### 533 **Feature extraction**

534 State usage, transition matrix and swimming speed in each trial are employed as  
535 features (also called measurements or attributes), including the averaged  
536 aggregation (unpolarized) state usages, dispersion (unpolarized) state usages,  
537 schooling (polarized) state usages, overall state usages, and transition matrix.  
538 Speed features include mean speed of all the 6 fish each trial in the last 10  
539 minutes of the recording, number of stop epochs from all 6 fish in each trial. PCA  
540 then is implemented to reduce the dimensionality of the feature space. Top 12 PCs  
541 are kept capturing above 95% of the variance. In addition, an alternative feature  
542 pool is tested, including only swimming speed distribution in each unpolarized  
543 state from all the trials. PCA dimensional reduction is followed and 3 top PCs are  
544 selected to capture 95% variance of the data.

#### 545 **Support vector machine**

546 The classifier we implement is the support vector machine (SVM) (Vapnick,  
547 1995), which is widely used for pattern classification (Ma, Randolph, & Drish,  
548 2001). For the classical binary formulation of SVM classification, the output of an  
549 SVM classifier yields:

$$550 \quad y = \text{sign}(f(x)), \quad (2)$$

$$551 \quad f(x) = \sum_{i=1}^{N_{SV}} \alpha_i y_i k(x, x_i) + b, \quad (3)$$

552 where  $\alpha_i$  are the Lagrange multipliers from solving the quadratic optimization

553 problem,  $y_i$  are the class targets,  $x_i$  are the input data points,  $k(x, x_i)$  is a kernel  
554 function (Chang, 2011),  $b$  is the bias, and  $N_{SV}$  is the number of support vectors.  
555 Linear kernel is used here since it is more capable of avoiding possible overfitting  
556 in the classification than other kernels (Keerthi & Lin, 2003).

557  
558 To extend a binary classification to a multi-class classification problem such as the  
559 problem at hand, several binary SVM classifiers need to be utilized. One-against-  
560 one classification method trains  $k(k-1)/2$  binary classifiers (where  $k$  is the number  
561 of classes) to solve  $k$  class classification problem. During prediction the class  
562 with the most votes becomes the winner. One-against-one outperforms other  
563 multi-class SVM classification methods (Hsu & Lin, 2002) and is the default  
564 choice in the libSVM package (Chang, 2011) that has been utilized in this study.

### 565 **Leave-one-out**

566 The Leave-One-Out (LOO) (Efron, 1993) validation method is used to evaluate  
567 the performance of the classifiers described in this study. Random one trial from  
568 each category is taken as the testing data and the remaining as the training data to  
569 train SVM multi-class classifiers. This procedure was applied for 100 times (most  
570 trial numbers are less than 10) by randomly choosing training and testing trials.  
571 All the test results are then combined into a cumulative confusion matrix.

572

### 573 **Acknowledgements**

574 We thank Ricardo Dolmetsch, Rainer Friedrich, Joseph Loureiro, Mark  
575 Borowsky, Brant Peterson, Gerald Sun, Lingling Shen, Ajeet Singh, Vibhas  
576 Aravamuthan, Stephen Litster, Guangliang Wang, and Jian Fang for discussion.  
577 We also want to thank Gerlinde Wussler, Kara Moloney, Meghan Aguirre, Franki  
578 Vetrano-Olsen, KarenJ Lee, Haley Clark, Johnathan Tobin, and Joseph Beaton for  
579 their support in the fish facility, also Stacey Gearin, Stephanie Wiessner, and  
580 Jessica Garver for CRISPR injection work, Caroline Fawcett for fish database  
581 management; thank Michael Steeves and Michael Derby for their help in  
582 computation resource; thank Michael Paolucci and Aaron Bickel for their help in  
583 hardware customizing; thank Andrea Schwarz and Lauren Goldfinger for project  
584 coordination. X.X. is supported by NIBR postdoctoral scholar program. Funding  
585 is provided by the Novartis Institutes for Biomedical Research (NIBR).

586

### 587 **Competing interests**

588 MCF: Consultant to NIBR; Boards of Directors of Semma Therapeutics and Beam  
589 Therapeutics; SAB of Tenaya Therapeutics.

## 590 Reference

- 591 Anderson, D. J., & Perona, P. (2014). Toward a science of computational ethology. *Neuron*, *84*(1), 18-31.  
592 doi:10.1016/j.neuron.2014.09.005
- 593 Baier, H. (2000). Zebrafish on the move: towards a behavior-genetic analysis of vertebrate vision. *Curr*  
594 *Opin Neurobiol*, *10*(4), 451-455.
- 595 Bartnik, M., Szczepanik, E., Derwinska, K., Wisniowiecka-Kowalnik, B., Gambin, T., Sykulski, M., . . .  
596 Stankiewicz, P. (2012). Application of array comparative genomic hybridization in 102 patients  
597 with epilepsy and additional neurodevelopmental disorders. *Am J Med Genet B Neuropsychiatr*  
598 *Genet*, *159b*(7), 760-771. doi:10.1002/ajmg.b.32081
- 599 Bishop, Christopher (2006). *Pattern Recognition and Machine Learning*: Springer.
- 600 Brockerhoff, S. E., Hurley, J. B., Janssen-Bienhold, U., Neuhauss, S. C., Driever, W., & Dowling, J. E.  
601 (1995). A behavioral screen for isolating zebrafish mutants with visual system defects. *Proc Natl*  
602 *Acad Sci U S A*, *92*(23), 10545-10549.
- 603 Chang, Chih-Chung, Lin, Chih-Jen. (2011). LIBSVM: A library for support vector machines. *ACM Trans.*  
604 *Intell. Syst. Technol*, *2*(3), 1-27.
- 605 Chicoli, Amanda, & Paley, Derek A. (2016). Probabilistic information transmission in a network of  
606 coupled oscillators reveals speed-accuracy trade-off in responding to threats. *Chaos*, *26*(11),  
607 116311. doi:10.1063/1.4966682
- 608 Chuang, K. S., Tzeng, H. L., Chen, S., Wu, J., & Chen, T. J. (2006). Fuzzy c-means clustering with spatial  
609 information for image segmentation. *Comput Med Imaging Graph*, *30*(1), 9-15.  
610 doi:10.1016/j.compmedimag.2005.10.001
- 611 Couzin, I. D. (2009). Collective cognition in animal groups. *Trends Cogn Sci*, *13*(1), 36-43.  
612 doi:10.1016/j.tics.2008.10.002
- 613 Csardi, Gabor, & Nepusz, Tamas. (2006). The igraph software package for complex network research.  
614 *InterJournal, Complex Systems*, *1695*(5), 1-9.
- 615 D T Pham, S S Dimov, C D Nguyen. (2005). Selection of K in K-means clustering *Journal of Mechanical*  
616 *Engineering Science*, *219*(1), 103-119.
- 617 Dankert, H., Wang, L., Hoopfer, E. D., Anderson, D. J., & Perona, P. (2009). Automated monitoring and  
618 analysis of social behavior in *Drosophila*. *Nat Methods*, *6*(4), 297-303. doi:10.1038/nmeth.1310
- 619 Darwin, Charles. (1871). *The Descent of Man, and Selection in Relation to Sex* United Kingdom: John  
620 Murray.
- 621 Efron, B., Tibshirani, R.J. . (1993). *An introduction to the bootstrap*: Chapman&Hall.
- 622 Faustino, A. I., Tacao-Monteiro, A., & Oliveira, R. F. (2017). Mechanisms of social buffering of fear in  
623 zebrafish. *Sci Rep*, *7*, 44329. doi:10.1038/srep44329
- 624 Feng, Y., Dong, F., Xia, X., Hu, C. H., Fan, Q., Hu, Y., . . . Mutic, S. (2017). An adaptive Fuzzy C-means  
625 method utilizing neighboring information for breast tumor segmentation in ultrasound images.  
626 *Med Phys*, *44*(7), 3752-3760. doi:10.1002/mp.12350
- 627 Feyder, M., Karlsson, R. M., Mathur, P., Lyman, M., Bock, R., Momenan, R., . . . Holmes, A. (2010).  
628 Association of mouse *Dlg4* (PSD-95) gene deletion and human *DLG4* gene variation with  
629 phenotypes relevant to autism spectrum disorders and Williams' syndrome. *Am J Psychiatry*,  
630 *167*(12), 1508-1517. doi:10.1176/appi.ajp.2010.10040484
- 631 Friedrich, R. W., Jacobson, G. A., & Zhu, P. (2010). Circuit neuroscience in zebrafish. *Curr Biol*, *20*(8),  
632 R371-381. doi:10.1016/j.cub.2010.02.039



- 633 Granato, M., van Eeden, F. J., Schach, U., Trowe, T., Brand, M., Furutani-Seiki, M., . . . Nusslein-Volhard,  
634 C. (1996). Genes controlling and mediating locomotion behavior of the zebrafish embryo and  
635 larva. *Development*, *123*, 399-413.
- 636 Greene, J. S., Brown, M., Dobosiewicz, M., Ishida, I. G., Macosko, E. Z., Zhang, X., . . . Bargmann, C. I.  
637 (2016). Balancing selection shapes density-dependent foraging behaviour. *Nature*, *539*(7628),  
638 254-258. doi:10.1038/nature19848
- 639 Greene, J. S., Dobosiewicz, M., Butcher, R. A., McGrath, P. T., & Bargmann, C. I. (2016). Regulatory  
640 changes in two chemoreceptor genes contribute to a *Caenorhabditis elegans* QTL for foraging  
641 behavior. *Elife*, *5*. doi:10.7554/eLife.21454
- 642 Greenwood, A. K., Wark, A. R., Yoshida, K., & Peichel, C. L. (2013). Genetic and neural modularity  
643 underlie the evolution of schooling behavior in threespine sticklebacks. *Curr Biol*, *23*(19), 1884-  
644 1888. doi:10.1016/j.cub.2013.07.058
- 645 Han, S., Tai, C., Westenbroek, R. E., Yu, F. H., Cheah, C. S., Potter, G. B., . . . Catterall, W. A. (2012).  
646 Autistic-like behaviour in *Scn1a*+/- mice and rescue by enhanced GABA-mediated  
647 neurotransmission. *Nature*, *489*(7416), 385-390. doi:10.1038/nature11356
- 648 Han, S., Taralova, E., Dupre, C., & Yuste, R. (2018). Comprehensive machine learning analysis of Hydra  
649 behavior reveals a stable basal behavioral repertoire. *Elife*, *7*. doi:10.7554/eLife.32605
- 650 Hiroshi Nishimasu, F. Ann Ran, Patrick D. Hsu, Silvana Konermann, Soraya Shehata, Naoshi Dohmae,  
651 Ryuichiro Ishitani, Feng Zhang, and Osamu Nureki. (2014). Crystal Structure of Cas9 in Complex  
652 with Guide RNA and Target DNA. *Cell*, *156*(5), 935-949.
- 653 Hong, W., Kennedy, A., Burgos-Artizzu, X. P., Zelikowsky, M., Navonne, S. G., Perona, P., & Anderson, D.  
654 J. (2015). Automated measurement of mouse social behaviors using depth sensing, video  
655 tracking, and machine learning. *Proc Natl Acad Sci U S A*, *112*(38), E5351-5360.  
656 doi:10.1073/pnas.1515982112
- 657 Hsu, C. W., & Lin, C. J. (2002). A comparison of methods for multiclass support vector machines. *IEEE*  
658 *Trans Neural Netw*, *13*(2), 415-425. doi:10.1109/72.991427
- 659 Ioannou, C. C., Guttal, V., & Couzin, I. D. (2012). Predatory fish select for coordinated collective motion  
660 in virtual prey. *Science*, *337*(6099), 1212-1215. doi:10.1126/science.1218919
- 661 Ioannou, C. C., Morrell, L. J., Ruxton, G. D., & Krause, J. (2009). The effect of prey density on predators:  
662 conspicuousness and attack success are sensitive to spatial scale. *Am Nat*, *173*(4), 499-506.  
663 doi:10.1086/597219
- 664 Jolles, Jolle W., Boogert, Neeltje J., Sridhar, Vivek H., Couzin, Iain D., & Manica, Andrea. (2017).  
665 Consistent Individual Differences Drive Collective Behavior and Group Functioning of Schooling  
666 Fish. *Current Biology*, *27*(18), 2862-2868.e2867. doi:10.1016/j.cub.2017.08.004
- 667 Kabra, M., Robie, A. A., Rivera-Alba, M., Branson, S., & Branson, K. (2013). JAABA: interactive machine  
668 learning for automatic annotation of animal behavior. *Nat Methods*, *10*(1), 64-67.  
669 doi:10.1038/nmeth.2281
- 670 Katz, Y., Tunstrom, K., Ioannou, C. C., Huepe, C., & Couzin, I. D. (2011). Inferring the structure and  
671 dynamics of interactions in schooling fish. *Proc Natl Acad Sci U S A*, *108*(46), 18720-18725.  
672 doi:10.1073/pnas.1107583108
- 673 Keerthi, S. S., & Lin, C. J. (2003). Asymptotic behaviors of support vector machines with Gaussian kernel.  
674 *Neural Comput*, *15*(7), 1667-1689. doi:10.1162/089976603321891855
- 675 Kent, W. J. (2002). BLAT--the BLAST-like alignment tool. *Genome Res*, *12*(4), 656-664.  
676 doi:10.1101/gr.229202
- 677 Krause, J. (1994). Differential fitness returns in relation to spatial position in groups. *Biol Rev Camb*  
678 *Philos Soc*, *69*(2), 187-206.
- 679 Krause, J., Hartmann, N., & Pritchard, V. L. (1999). The influence of nutritional state on shoal choice in  
680 zebrafish, *Danio rerio*. *Anim Behav*, *57*(4), 771-775. doi:10.1006/anbe.1998.1010

- 681 Kravitz, E. A., & Huber, R. (2003). Aggression in invertebrates. *Curr Opin Neurobiol*, 13(6), 736-743.
- 682 Kullback, S., & Leibler, R. A. (1951). On Information and Sufficiency. *The Annals of Mathematical*
- 683 *Statistics*, 22(1), 79-86.
- 684 Laurens van der Maaten, Geoffrey Hinton. (2008). Visualizing High-Dimensional Data Using t-SNE.
- 685 *Journal of Machine Learning Research*, 9, 2579–2605.
- 686 Li, X., & Xiao, J. (2010). Swarming in homogeneous environments: a social interaction based framework.
- 687 *J Theor Biol*, 264(3), 747-759. doi:10.1016/j.jtbi.2010.02.016
- 688 Lu, B., Poirier, C., Gaspar, T., Gratzke, C., Harrison, W., Busija, D., . . . Bishop, C. E. (2008). A mutation in
- 689 the inner mitochondrial membrane peptidase 2-like gene (*Immp2l*) affects mitochondrial
- 690 function and impairs fertility in mice. *Biol Reprod*, 78(4), 601-610.
- 691 doi:10.1095/biolreprod.107.065987
- 692 Lukeman, R., Li, Y. X., & Edelstein-Keshet, L. (2010). Inferring individual rules from collective behavior.
- 693 *Proc Natl Acad Sci U S A*, 107(28), 12576-12580. doi:10.1073/pnas.1001763107
- 694 Ma, Changxue, Randolph, M. A., & Drish, J. (2001). *A support vector machines-based rejection technique*
- 695 *for speech recognition*. Paper presented at the Acoustics, Speech, and Signal Processing,
- 696 Proceedings. (ICASSP '01). 2001 IEEE International Conference on.
- 697 Markham, N. R., & Zuker, M. (2008). UNAFold: software for nucleic acid folding and hybridization.
- 698 *Methods Mol Biol*, 453, 3-31. doi:10.1007/978-1-60327-429-6\_1
- 699 Meeker, N. D., Hutchinson, S. A., Ho, L., & Trede, N. S. (2007). Method for isolation of PCR-ready
- 700 genomic DNA from zebrafish tissues. *Biotechniques*, 43(5), 610, 612, 614.
- 701 Meyer, A., & Schartl, M. (1999). Gene and genome duplications in vertebrates: the one-to-four (-to-eight
- 702 in fish) rule and the evolution of novel gene functions. *Curr Opin Cell Biol*, 11(6), 699-704.
- 703 Moreno-Mateos, M. A., Vejnar, C. E., Beaudoin, J. D., Fernandez, J. P., Mis, E. K., Khokha, M. K., &
- 704 Giraldez, A. J. (2015). CRISPRscan: designing highly efficient sgRNAs for CRISPR-Cas9 targeting in
- 705 vivo. *Nat Methods*, 12(10), 982-988. doi:10.1038/nmeth.3543
- 706 Muto, A., Orger, M. B., Wehman, A. M., Smear, M. C., Kay, J. N., Page-McCaw, P. S., . . . Baier, H. (2005).
- 707 Forward genetic analysis of visual behavior in zebrafish. *PLoS Genet*, 1(5), e66.
- 708 doi:10.1371/journal.pgen.0010066
- 709 Nasiadka, A., & Clark, M. D. (2012). Zebrafish breeding in the laboratory environment. *Ilar j*, 53(2), 161-
- 710 168. doi:10.1093/ilar.53.2.161
- 711 Peca, J., Feliciano, C., Ting, J. T., Wang, W., Wells, M. F., Venkatraman, T. N., . . . Feng, G. (2011). Shank3
- 712 mutant mice display autistic-like behaviours and striatal dysfunction. *Nature*, 472(7344), 437-
- 713 442. doi:10.1038/nature09965
- 714 Perez-Escudero, Alfonso, Vicente-Page, Julian, Hinz, Robert C., Arganda, Sara, & de Polavieja, Gonzalo G.
- 715 (2014). idTracker: tracking individuals in a group by automatic identification of unmarked
- 716 animals. *Nat Meth*, 11(7), 743-748. doi:10.1038/nmeth.2994
- 717 <http://www.nature.com/nmeth/journal/v11/n7/abs/nmeth.2994.html#supplementary-information>
- 718 Petek, E., Windpassinger, C., Vincent, J. B., Cheung, J., Boright, A. P., Scherer, S. W., . . . Wagner, K.
- 719 (2001). Disruption of a novel gene (*IMMP2L*) by a breakpoint in 7q31 associated with Tourette
- 720 syndrome. *Am J Hum Genet*, 68(4), 848-858. doi:10.1086/319523
- 721 Peterson, R. T., Shaw, S. Y., Peterson, T. A., Milan, D. J., Zhong, T. P., Schreiber, S. L., . . . Fishman, M. C.
- 722 (2004). Chemical suppression of a genetic mutation in a zebrafish model of aortic coarctation.
- 723 *Nat Biotechnol*, 22(5), 595-599. doi:10.1038/nbt963
- 724 Portugues, R., & Engert, F. (2009). The neural basis of visual behaviors in the larval zebrafish. *Curr Opin*
- 725 *Neurobiol*, 19(6), 644-647. doi:10.1016/j.conb.2009.10.007
- 726 Rennekamp, Andrew J., Huang, Xi-Ping, Wang, You, Patel, Samir, Lorello, Paul J., Cade, Lindsay, . . .
- 727 Peterson, Randall T. (2016). Sigma-1 receptor ligands control a switch between passive and
- 728 active threat responses. *Nature chemical biology*, 12(7), 552-558. doi:10.1038/nchembio.2089

- 729 Rihel, J., Prober, D. A., Arvanites, A., Lam, K., Zimmerman, S., Jang, S., . . . Schier, A. F. (2010). Zebrafish  
730 behavioral profiling links drugs to biological targets and rest/wake regulation. *Science*,  
731 327(5963), 348-351. doi:10.1126/science.1183090
- 732 Siew, Xiaosheng Peng ; Chengke Zhou ; Donald M. Hepburn ; Martin D. Judd;W. H. (2013). Application of  
733 K-Means method to pattern recognition in on-line cable partial discharge monitoring *IEEE*  
734 *Transactions on Dielectrics and Electrical Insulation*, 20(3), 754 - 761
- 735 Spedding, G. (2011). Aerodynamics: The cost of flight in flocks. *Nature*, 474(7352), 458-459.  
736 doi:10.1038/474458a
- 737 Spence, R., Gerlach, G., Lawrence, C., & Smith, C. (2008). The behaviour and ecology of the zebrafish,  
738 *Danio rerio*. *Biol Rev Camb Philos Soc*, 83(1), 13-34. doi:10.1111/j.1469-185X.2007.00030.x
- 739 Sumpter, David J. T. (2010). *Collective Animal Behavior*: Princeton University Press.
- 740 Sztal, T. E., McKaige, E. A., Williams, C., Ruparelia, A. A., & Bryson-Richardson, R. J. (2018). Genetic  
741 compensation triggered by actin mutation prevents the muscle damage caused by loss of actin  
742 protein. *PLoS Genet*, 14(2), e1007212. doi:10.1371/journal.pgen.1007212
- 743 Tinbergen, N. (1952). *The Study of Instinct*. Oxford, ISBN-0198577222.
- 744 Todd, J. G., Kain, J. S., & de Bivort, B. L. (2017). Systematic exploration of unsupervised methods for  
745 mapping behavior. *Phys Biol*, 14(1), 015002. doi:10.1088/1478-3975/14/1/015002
- 746 Torney, C. J., Berdahl, A., & Couzin, I. D. (2011). Signalling and the evolution of cooperative foraging in  
747 dynamic environments. *PLoS Comput Biol*, 7(9), e1002194. doi:10.1371/journal.pcbi.1002194
- 748 Tunstrom, K., Katz, Y., Ioannou, C. C., Huepe, C., Lutz, M. J., & Couzin, I. D. (2013). Collective states,  
749 multistability and transitional behavior in schooling fish. *PLoS Comput Biol*, 9(2), e1002915.  
750 doi:10.1371/journal.pcbi.1002915
- 751 Vapnick, V. (1995). *The Nature of Statistical Learning Theory*. New York: Springer-Verlag.
- 752 Wiltschko, A. B., Johnson, M. J., Iurilli, G., Peterson, R. E., Katon, J. M., Pashkovski, S. L., . . . Datta, S. R.  
753 (2015). Mapping Sub-Second Structure in Mouse Behavior. *Neuron*, 88(6), 1121-1135.  
754 doi:10.1016/j.neuron.2015.11.031
- 755 Yabuki, Y., Koide, T., Miyasaka, N., Wakisaka, N., Masuda, M., Ohkura, M., . . . Yoshihara, Y. (2016).  
756 Olfactory receptor for prostaglandin F2alpha mediates male fish courtship behavior. *Nat*  
757 *Neurosci*, 19(7), 897-904. doi:10.1038/nn.4314
- 758 Yates, C. A., Erban, R., Escudero, C., Couzin, I. D., Buhl, J., Kevrekidis, I. G., . . . Sumpter, D. J. (2009).  
759 Inherent noise can facilitate coherence in collective swarm motion. *Proc Natl Acad Sci U S A*,  
760 106(14), 5464-5469. doi:10.1073/pnas.0811195106
- 761 Zhu, P., Narita, Y., Bundschuh, S. T., Fajardo, O., Scharer, Y. P., Chattopadhyaya, B., . . . Friedrich, R. W.  
762 (2009). Optogenetic Dissection of Neuronal Circuits in Zebrafish using Viral Gene Transfer and  
763 the Tet System. *Front Neural Circuits*, 3, 21. doi:10.3389/neuro.04.021.2009
- 764

a 36 dpf

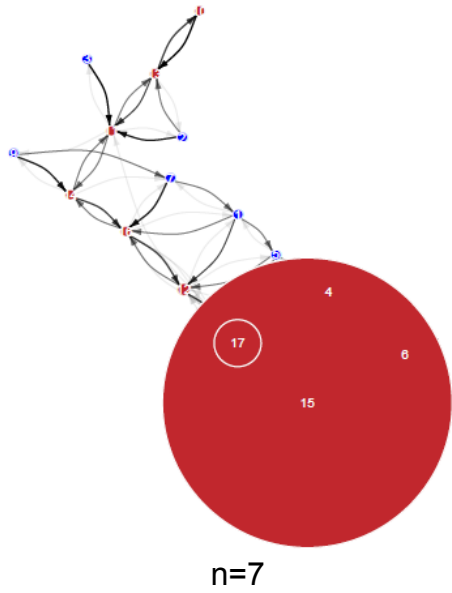

b 50 dpf

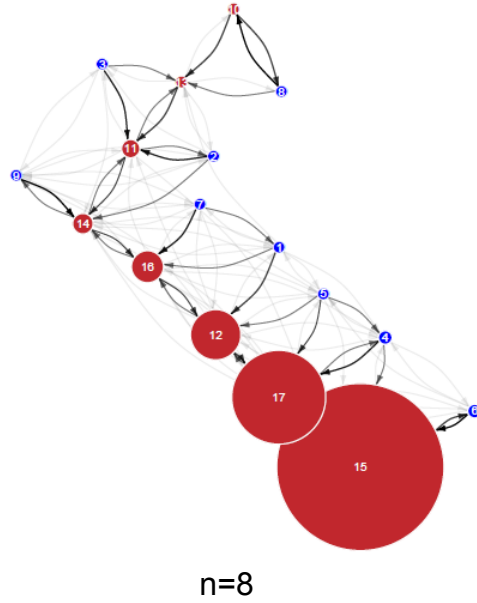

c 66 dpf

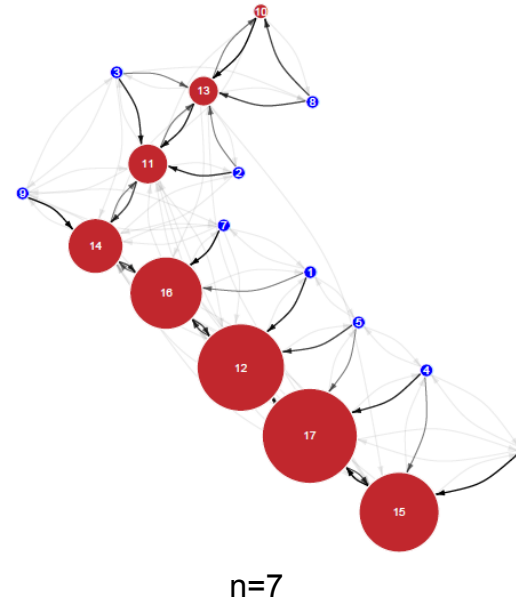

d >90 dpf

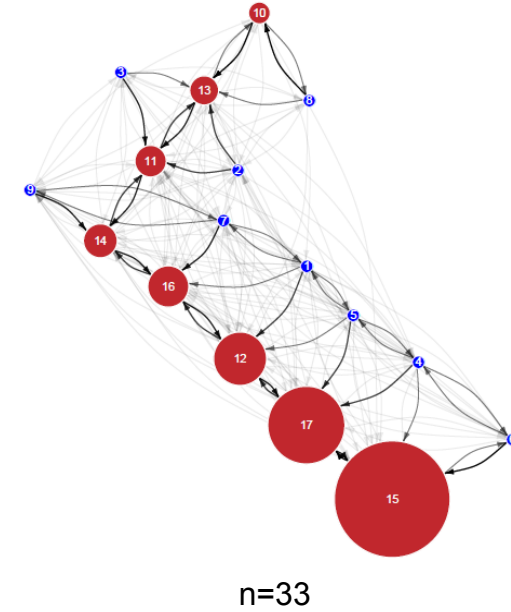

Supplemental Figure 1 Development of collective behavior, showing ethograms of wild-type fish (a) 36 dpf (note that most of the usage concentrates in state 15, the tightest cohesion state, and that the dispersed schooling state 8 is missing); (b) 50 dpf (tight cohesion states 15 and 17 are still the majority of state usage); (c) 66 dpf (the collective behavior state usage is similar to adult fish, although the transitions between states are less dense); (d) adult fish. Collective behavior is not mature until the fish are about 3 months old.

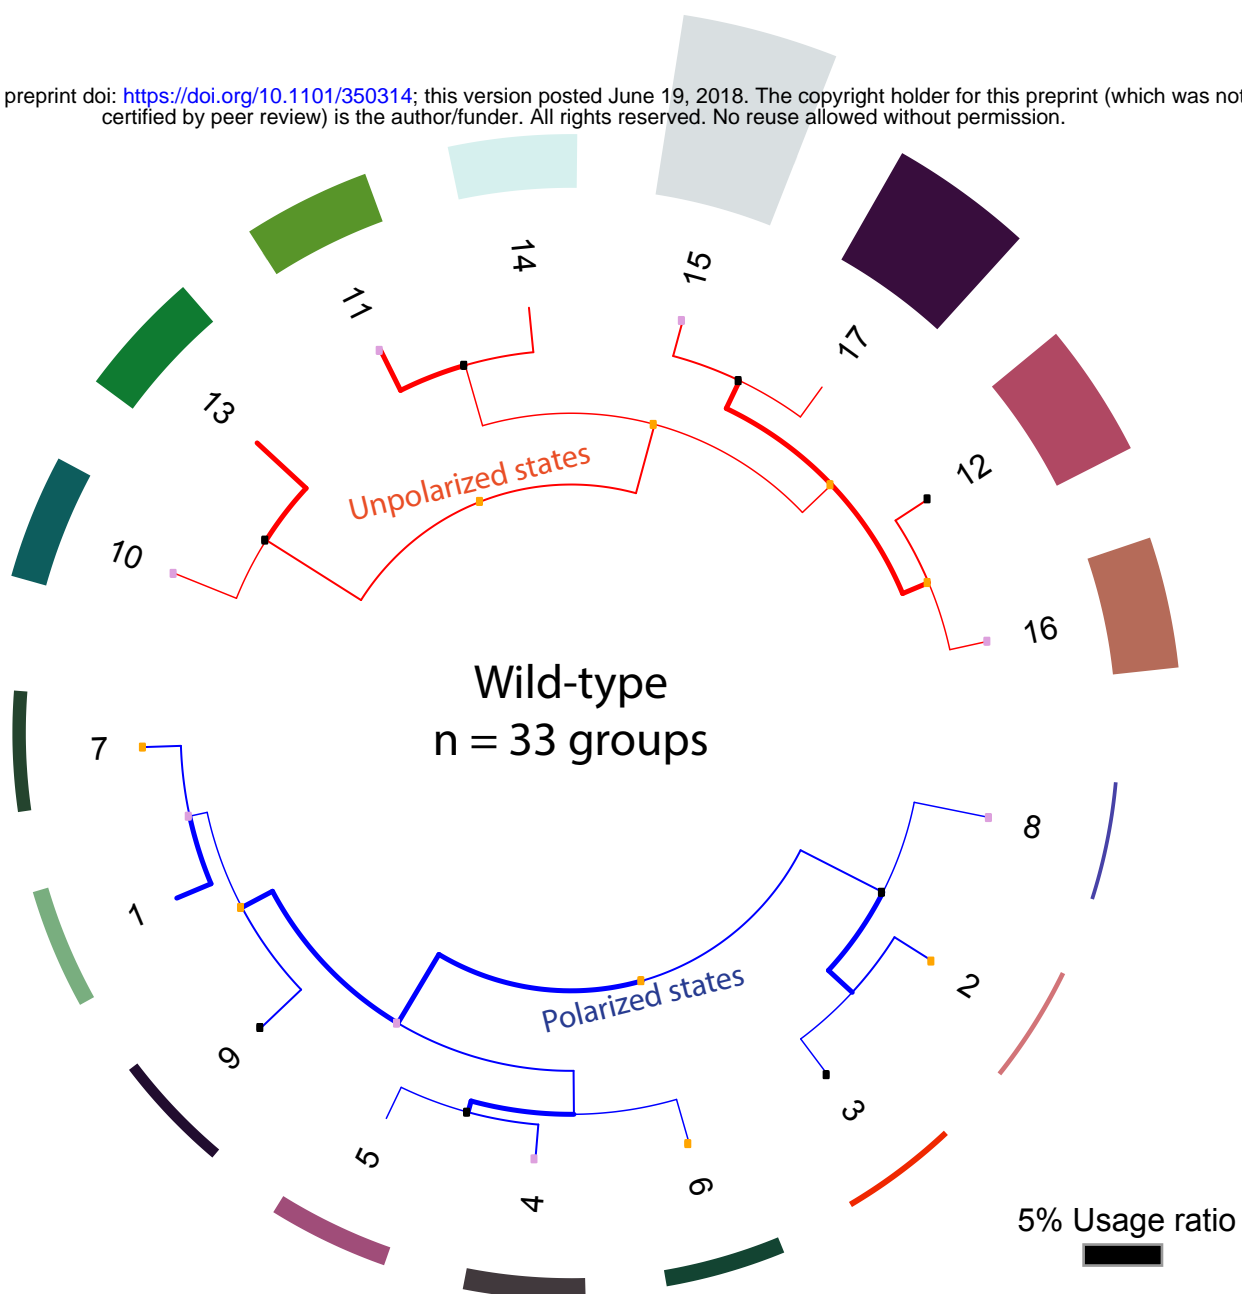

Supplemental Figure 2 Dendrogram of wild-type fish collective behavioral states defined using hierarchical clustering.



a Polarized states

b Unpolarized states

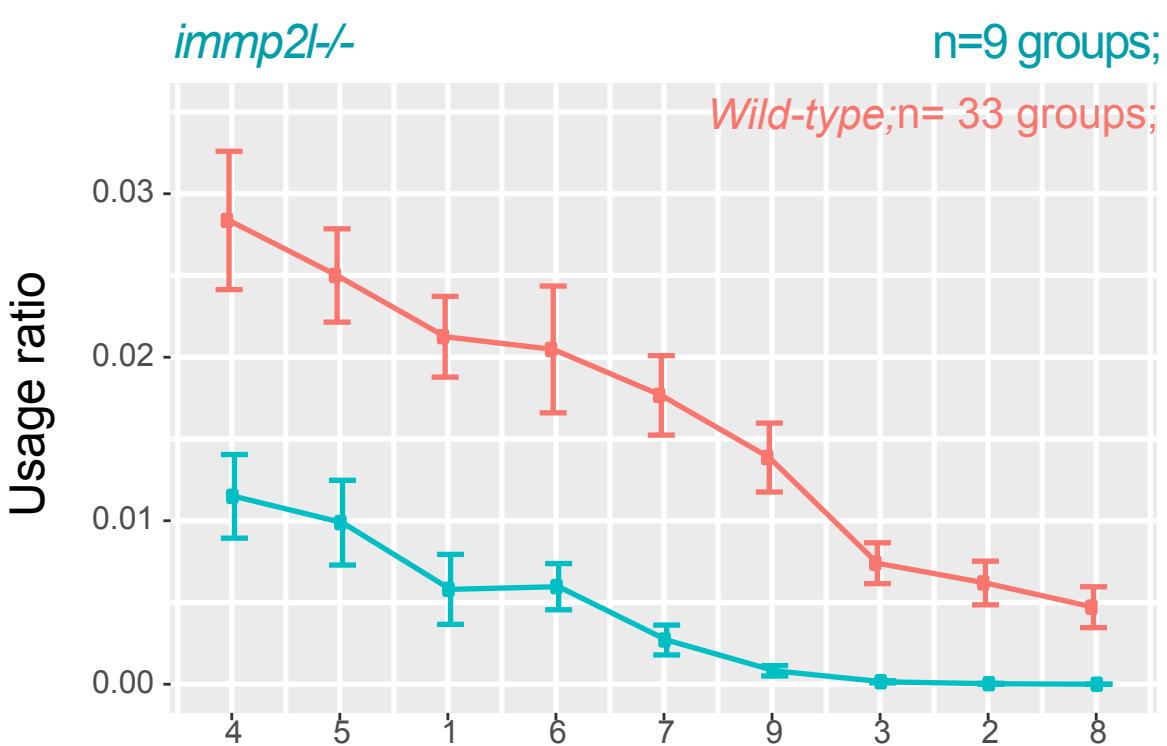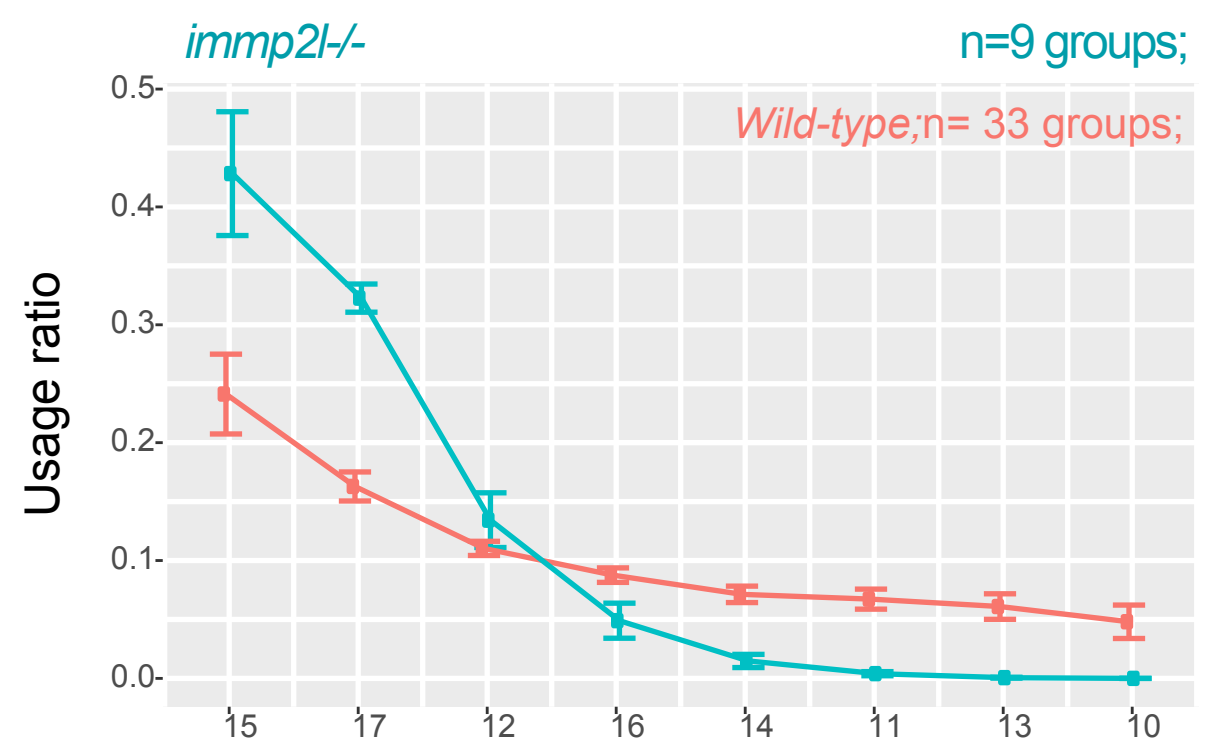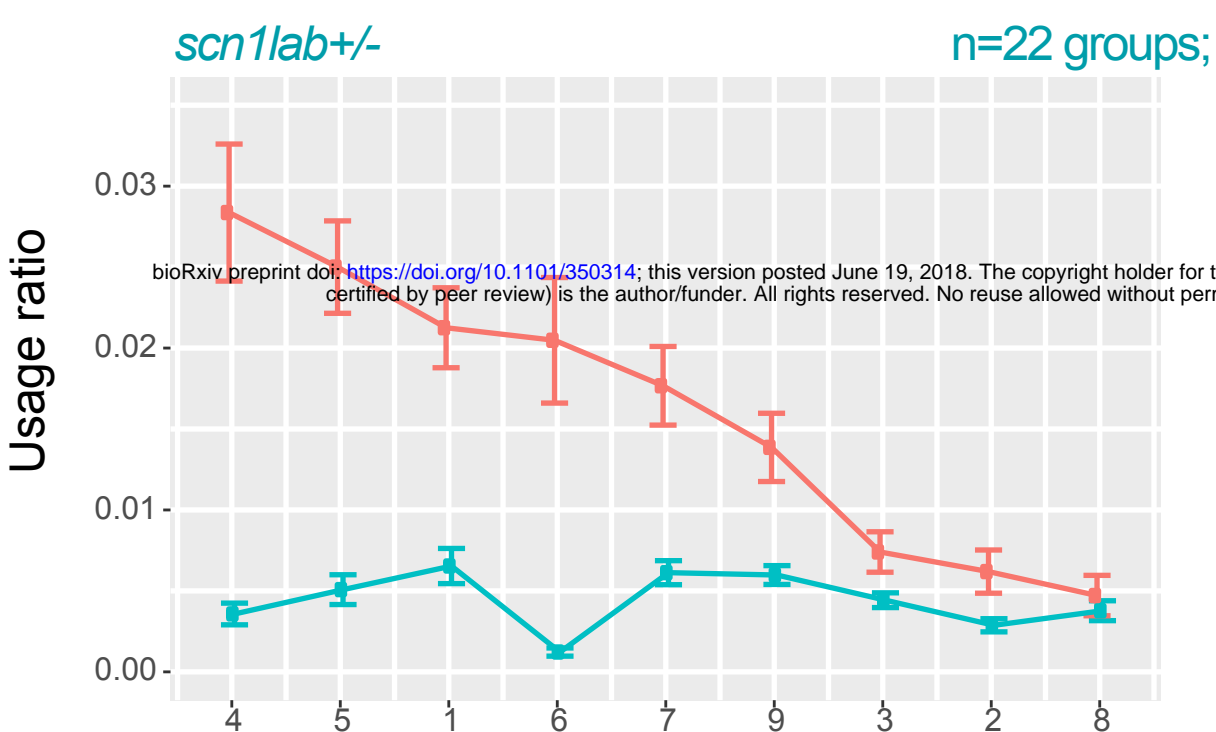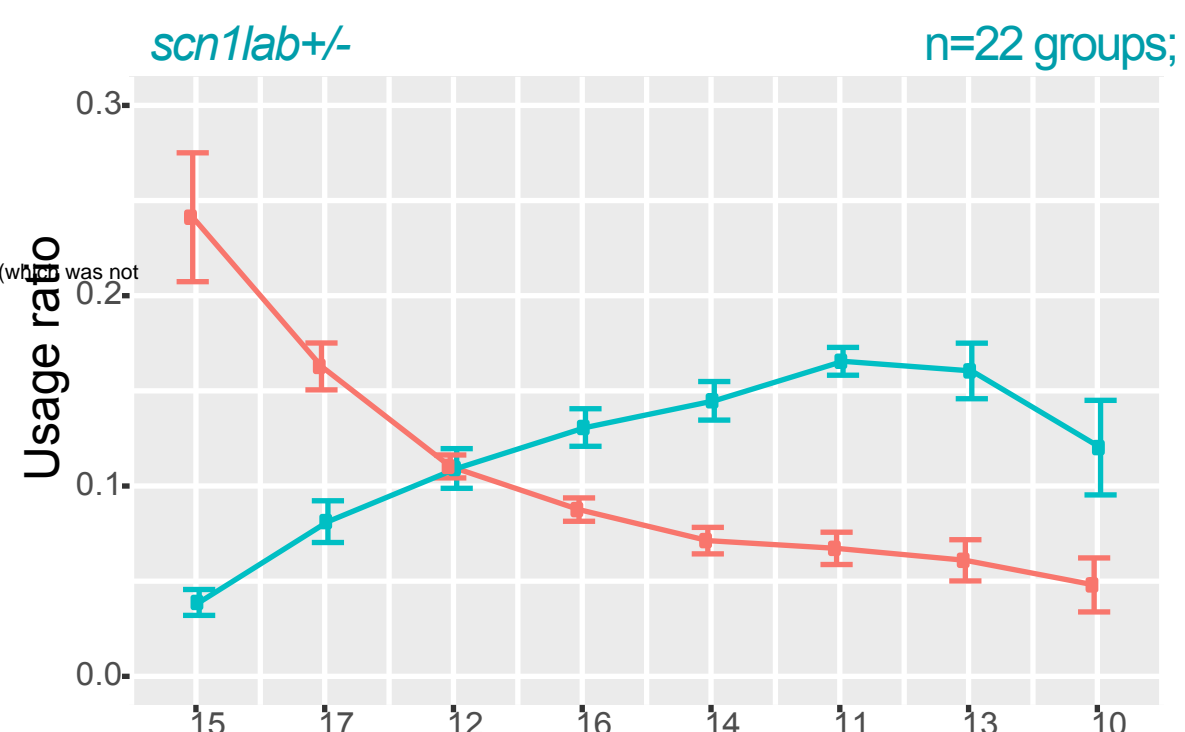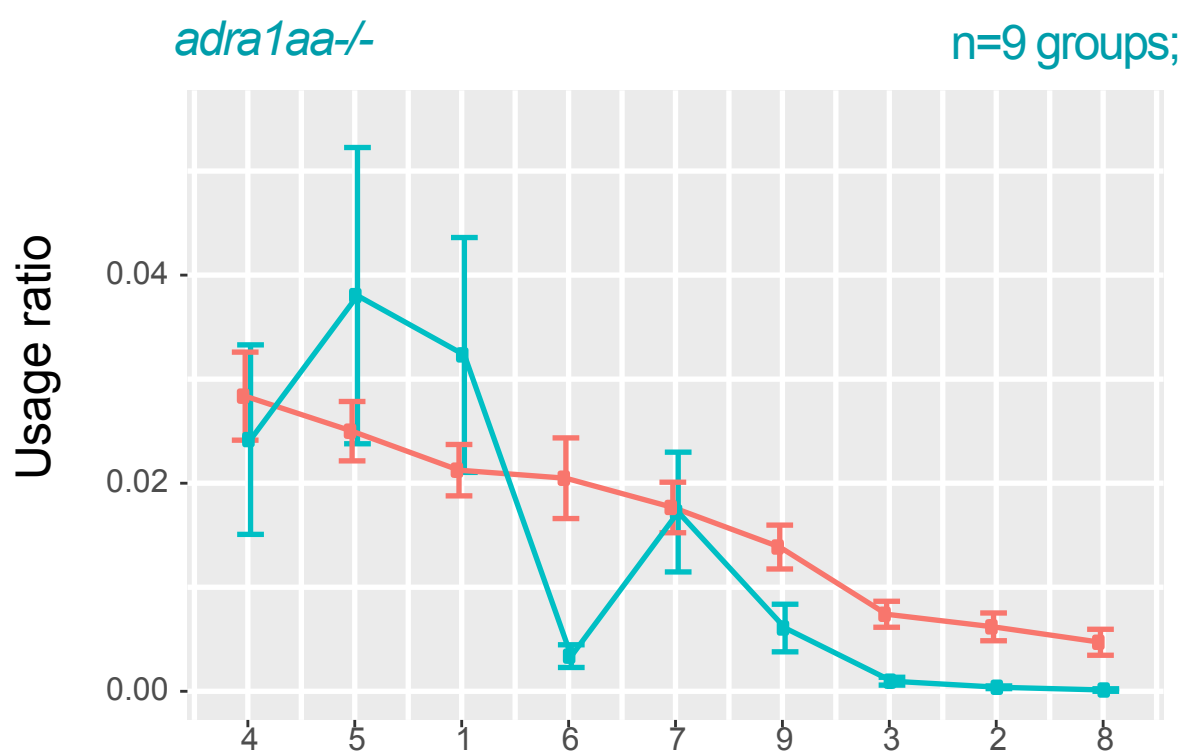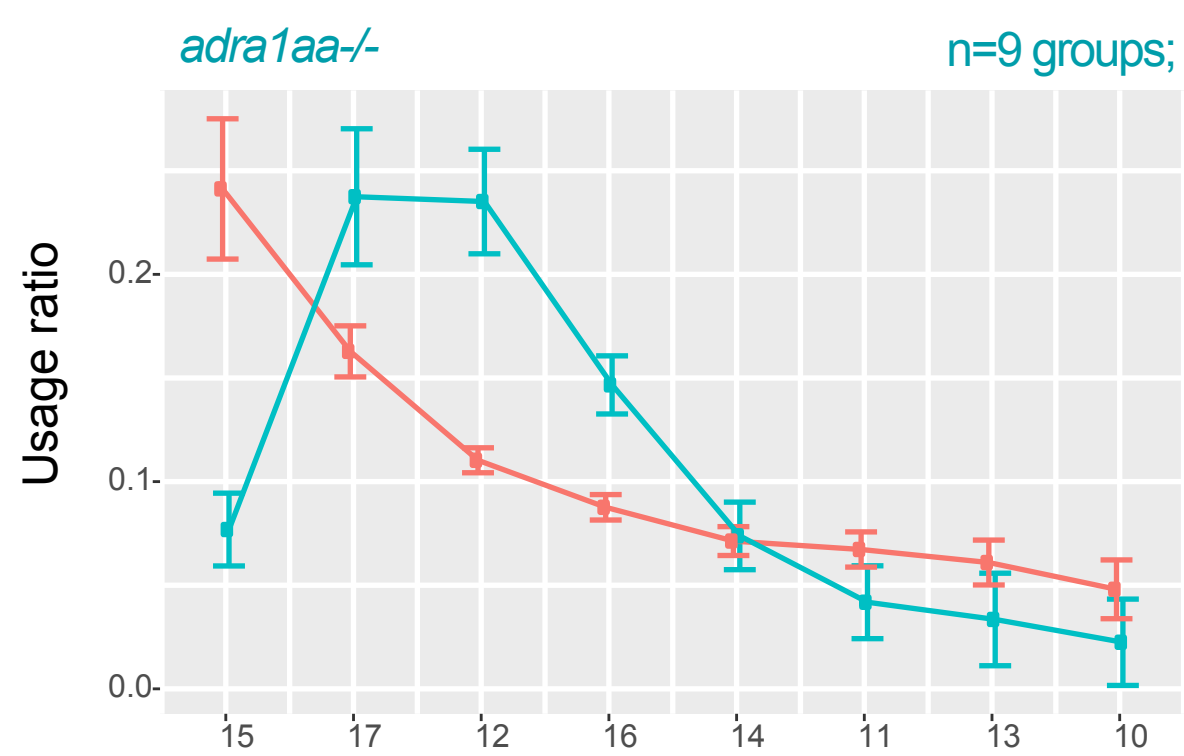

Polarized states (ranked by usage ratio of wt)

Unpolarized states (ranked by usage ratio of wt)

Supplemental Figure 3 Usage ratios of mutant states. Usage ratios of all (a) polarized and (b) unpolarized states are compared to corresponding states in wild-type (error bars indicate  $\pm$ SEM). The usage ratios are compatible with observations described in the text for the ethograms of Figure 2, and with significance test in Supplemental Figure 6.

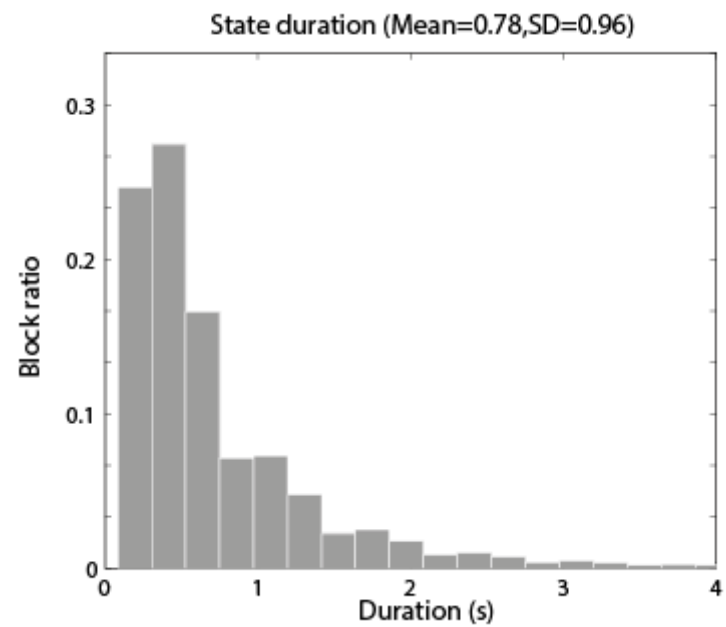

Supplemental Figure 4 Block duration of states (Fewer than 1.2% last longer than 4 seconds). The mean is  $0.78 \pm 0.96$  seconds.

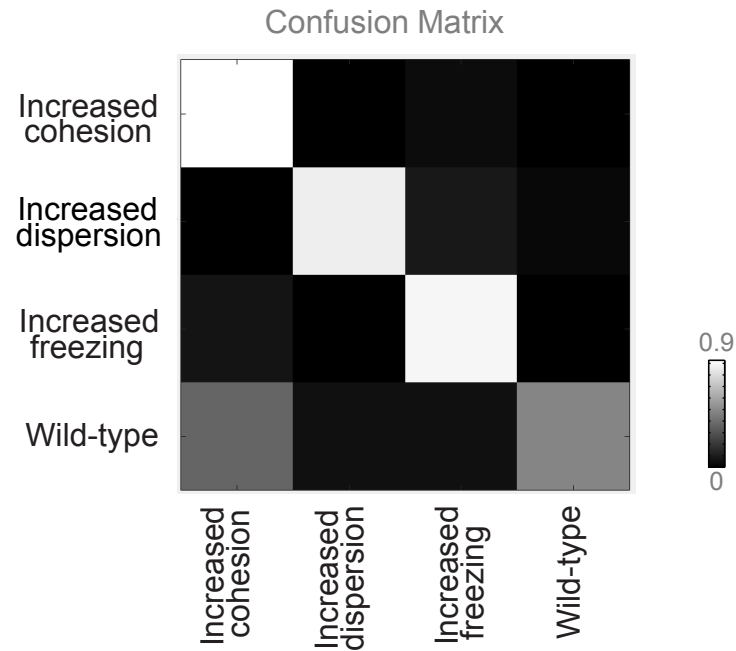

Supplemental Figure 5 Cross-validation by multi-class Support Vector Machines confirms robust phenotypes revealed in highlighted mutants. Confusion matrix computed using features, including state usage ratios, transitions, *etc.* *immp2l*<sup>-/-</sup> (n=9 groups, Prediction Accuracy (PA) = 0.95; Leave-One-Out); *scn1lab*<sup>+/-</sup> (n=22 groups, PA= 0.88; Leave-One-Out); *adra1aa*<sup>-/-</sup> (n=8 groups, PA= 0.92; Leave-One-Out).

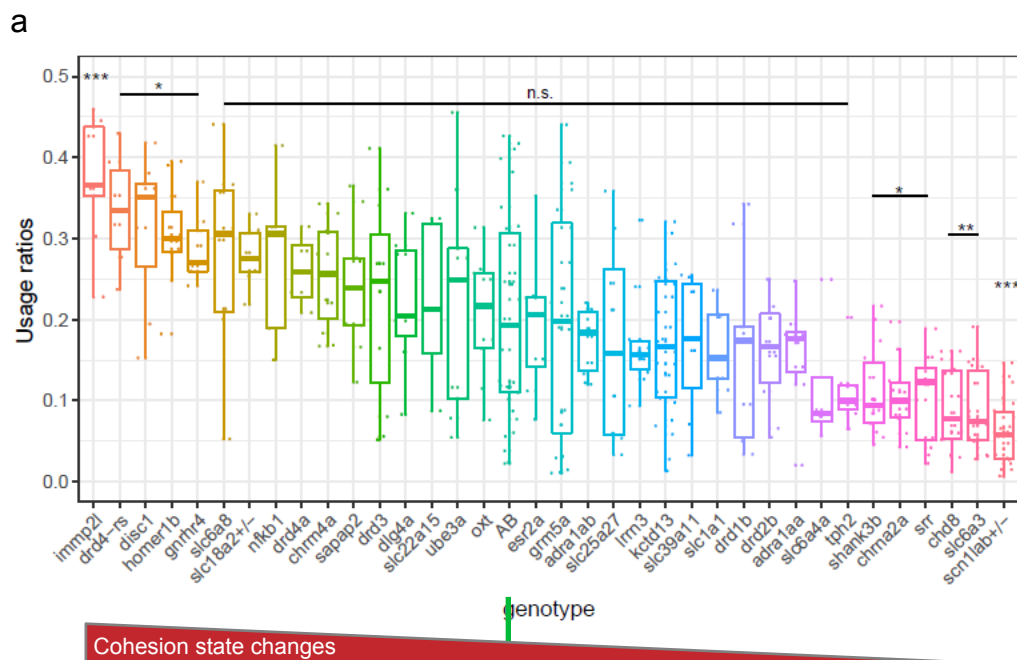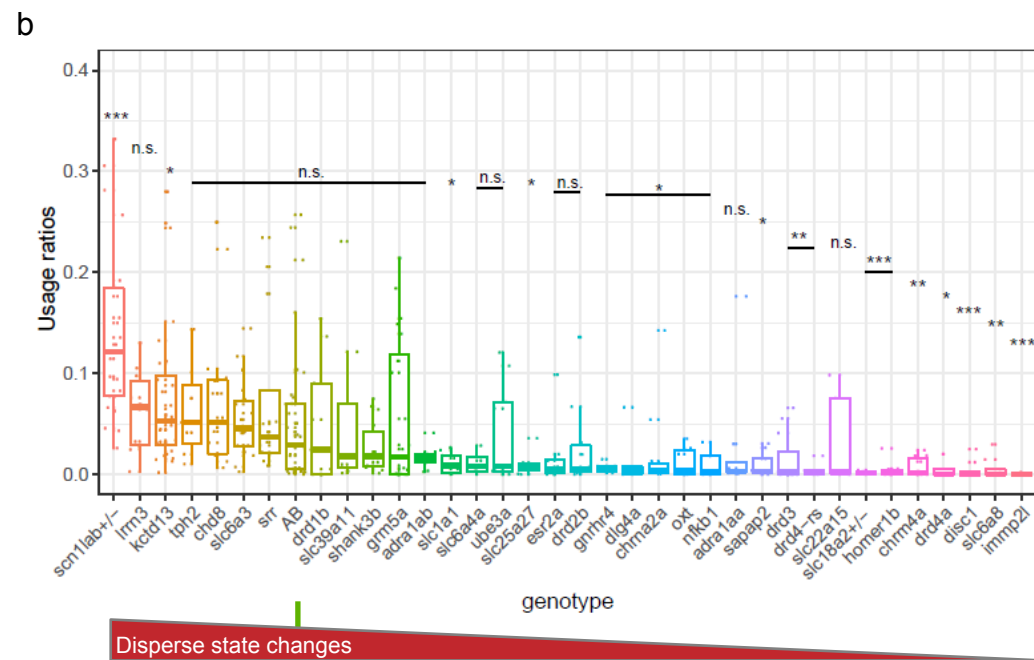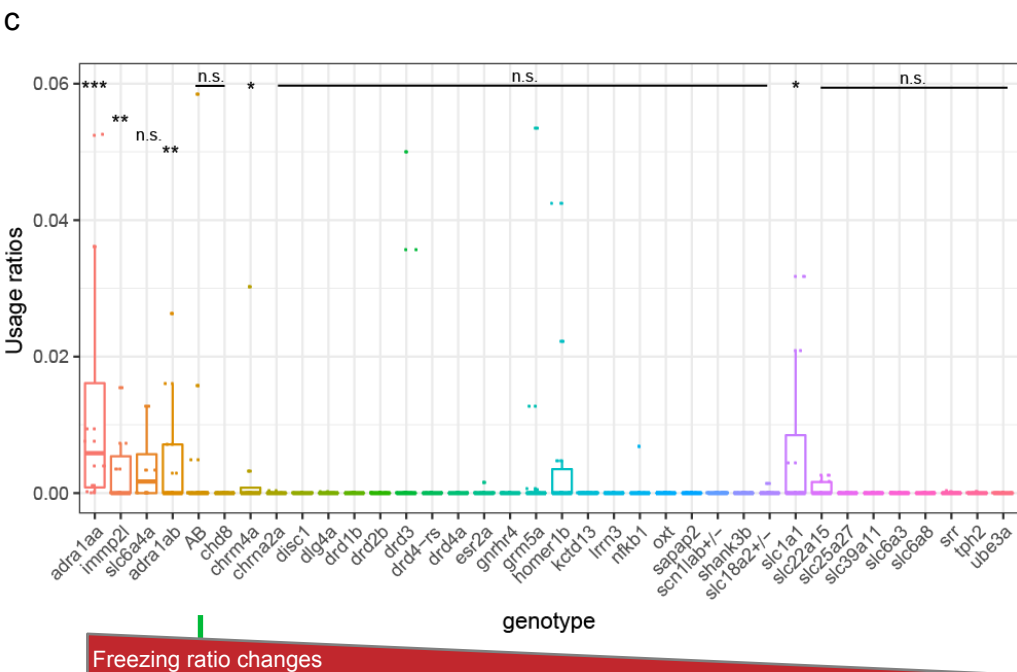

Supplemental Figure 6 Ranked usage ratios of fish having each mutation, compared to: (a) *immp2l*<sup>-/-</sup>'s tendency to cohesion; using the usage ratios of the top two tight cohesion sites which are significantly enhanced in *immp2l*<sup>-/-</sup> compared to wild-type (n=9 groups, p<0.001; Mann-Whitney U-test). By this comparison, significantly more cohesion is also demonstrated by *drd4-rs*<sup>-/-</sup> (n=6 groups; p<0.05; Mann-Whitney U-test), *disc1*<sup>-/-</sup> (n=9 groups; p<0.05; Mann-Whitney U-test), *homer1b*<sup>-/-</sup> (n=11 groups; p<0.05; Mann-Whitney U-test), and *gnhr4*<sup>-/-</sup> (n=9 groups; p<0.05; Mann-Whitney U-test). (b) *scn1lab*<sup>+/-</sup>'s tendency to disperse, using the usage ratios of the top two dispersed states significantly enhanced in *scn1lab*<sup>+/-</sup> compared to wild-type (n=22 groups; p<0.001; Mann-Whitney U-test). By this comparison significantly more dispersion also is shown by *kctd13*<sup>-/-</sup> (n=28 groups; p<0.05; Mann-Whitney U-test). (c) *adra1aa*<sup>-/-</sup>'s tendency to freeze; the ratio is calculated from the duration of simultaneous freezing of 3 fish in the last 10 minutes of the recording (n=8 groups; p<0.001; Mann-Whitney U-test). This tendency also is shown by, *immp2l*<sup>-/-</sup> (n=9 groups; p<0.01; Mann-Whitney U-test) and *adra1ab*<sup>-/-</sup> (n=10 groups, p<0.01; Mann-Whitney U-test).

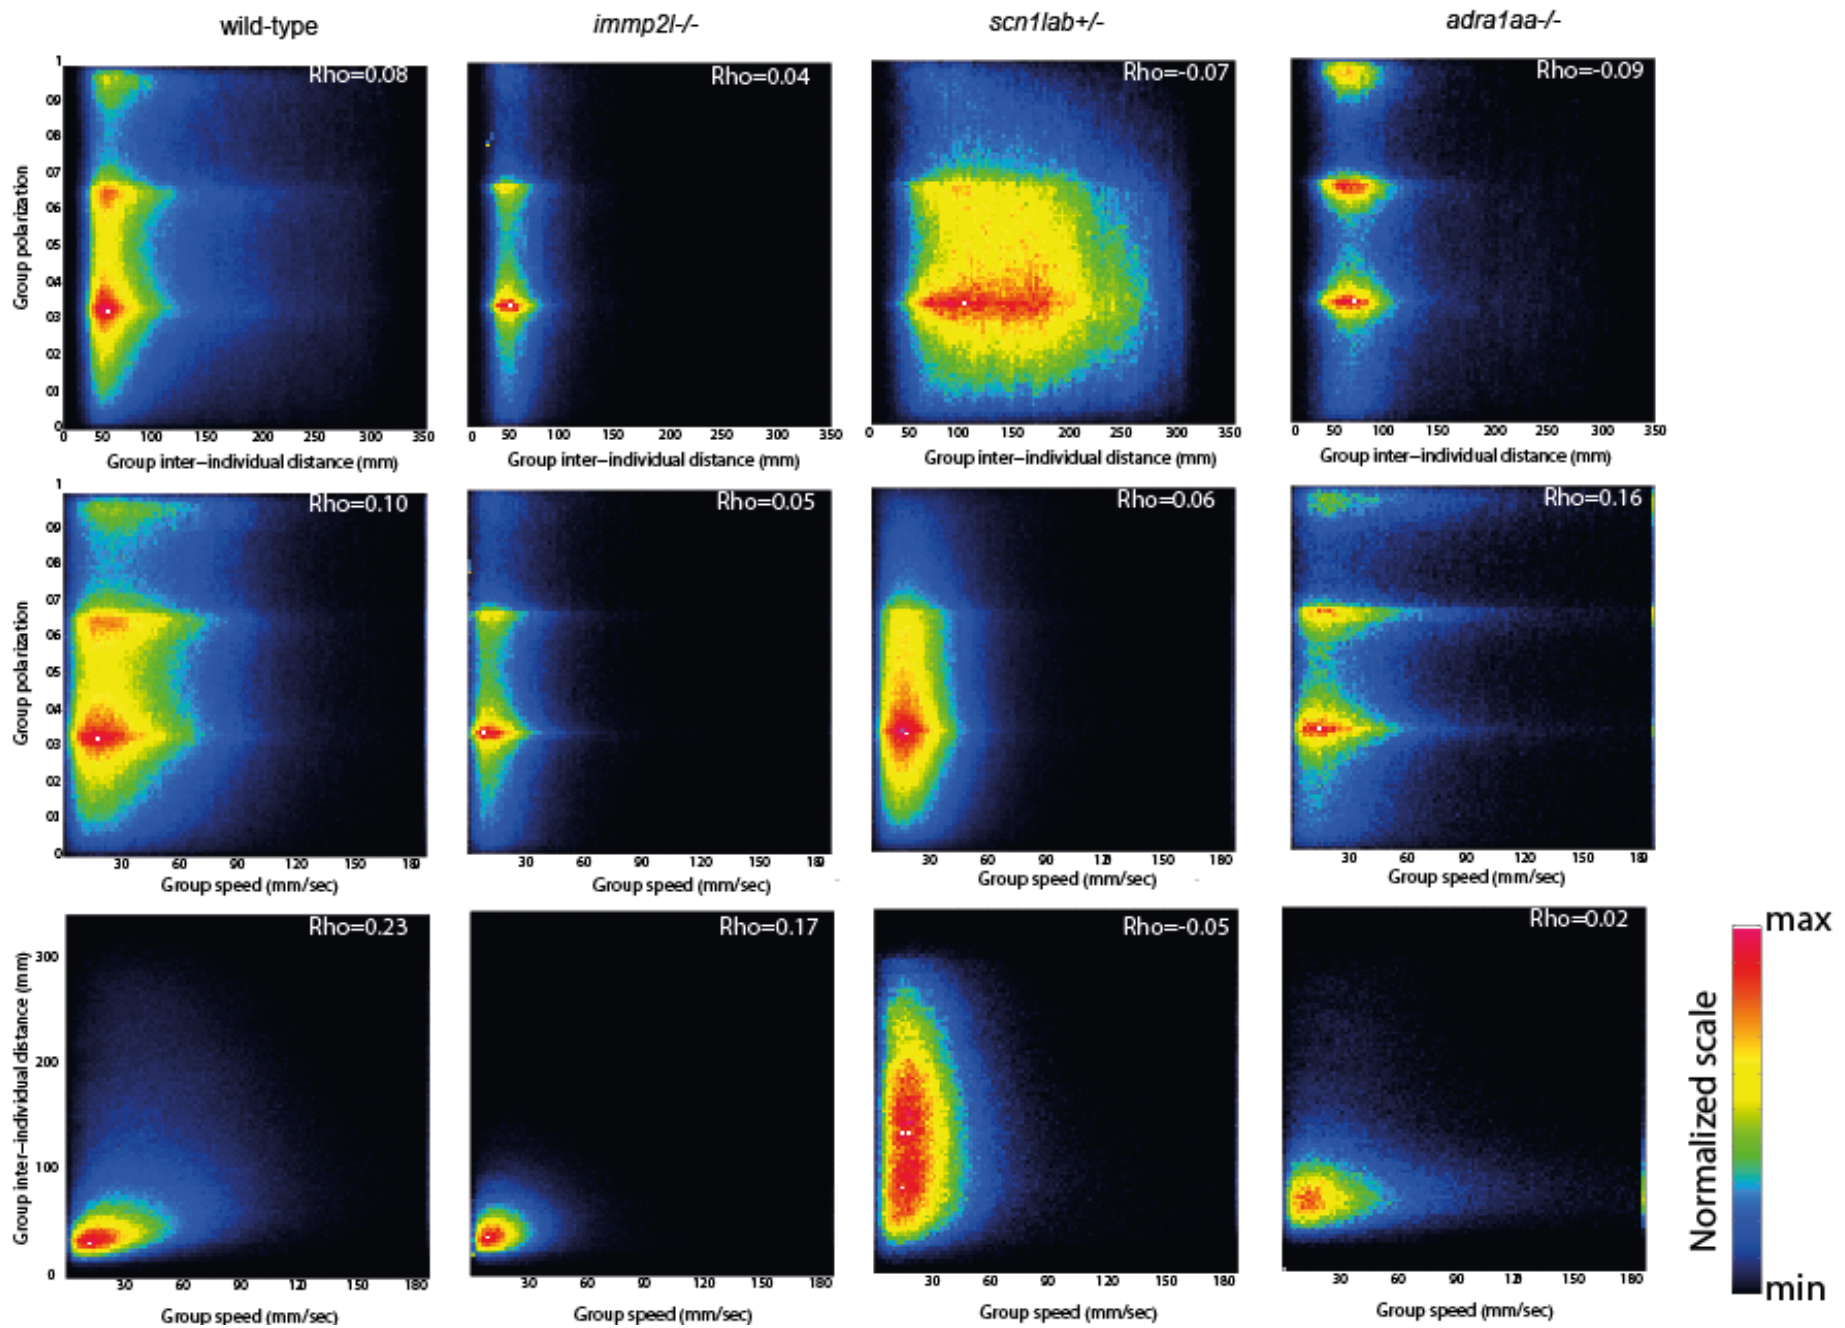

Supplemental Figure 7 Lack of relationship between group polarization and inter-individual distance (top panels) and speed (middle panels) or between inter-individual distance and speed (bottom panels), for the mutations discussed. The colors indicate the number of frames in each bin (100 bins in each dimension).



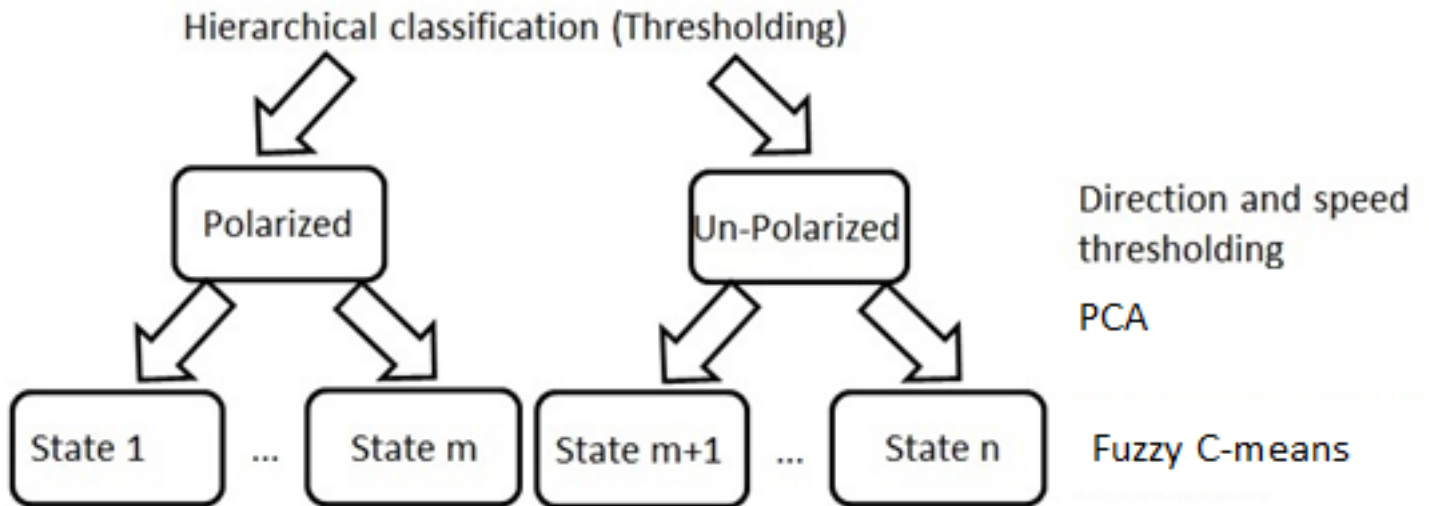

b

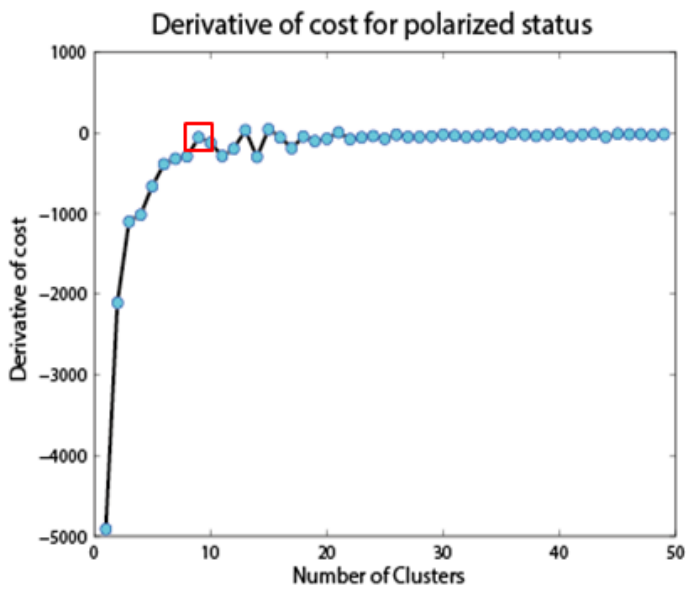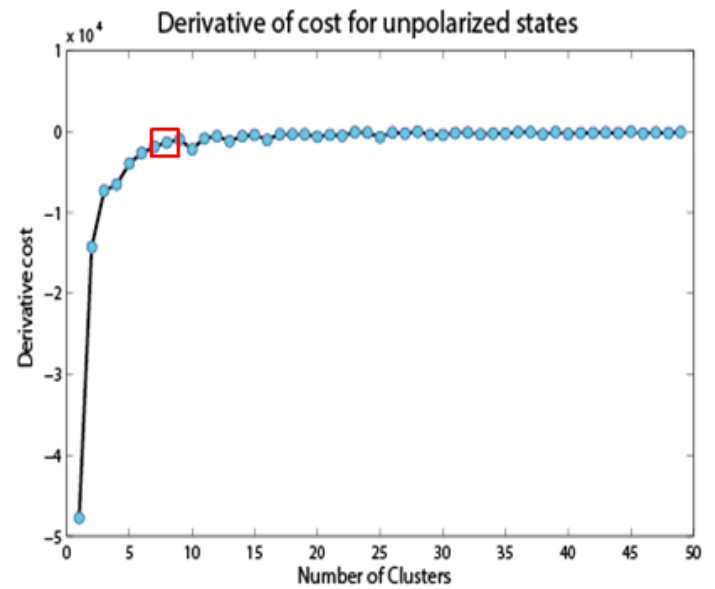

Supplemental Figure 8 (a) Hierarchical clustering flow chart of collective behavior unsupervised learning (b) The derivative of cost of the clustering for polarized and unpolarized states, respectively. The red square boxed mark the cluster number we chose.

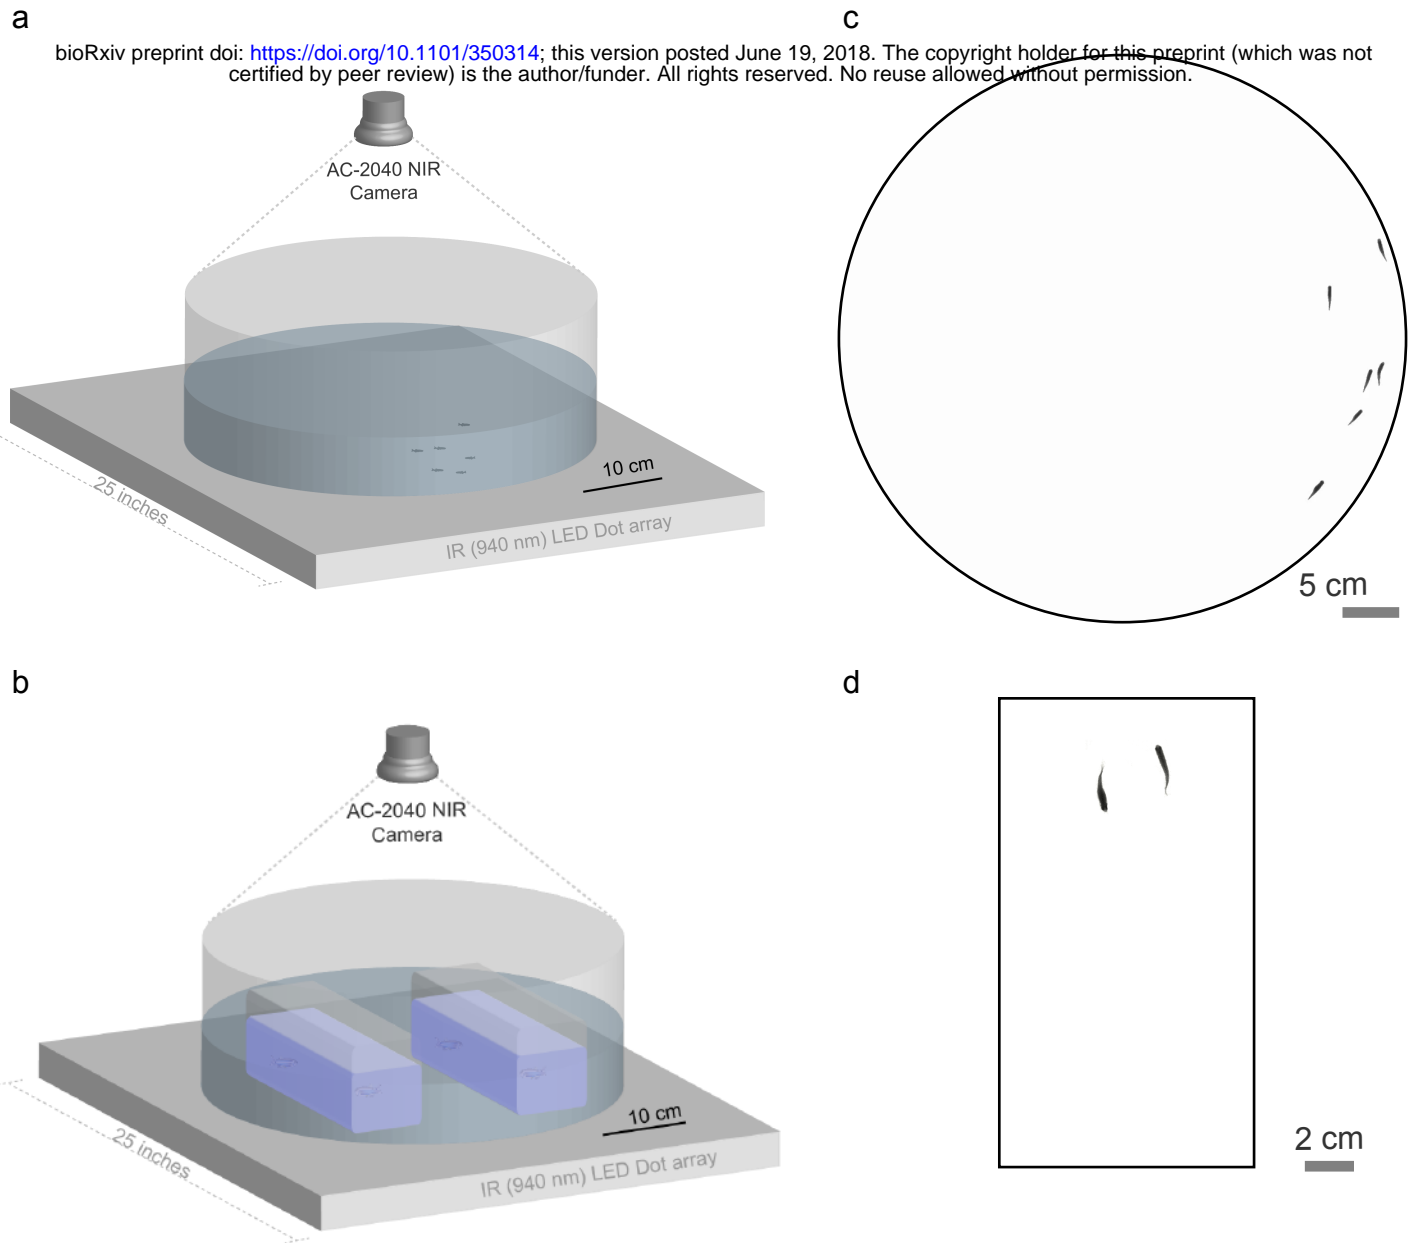

Supplemental Figure 9 Behavioral assay setup (a) Collective behavior assays and (b) courtship behavior assays were recorded from Top View, with bottom IR (940 nm) illumination. Examples of background removed images are shown for (c) collective behavior assays and (d) courtship behavior assays.

a t-SNE plot for polarized states

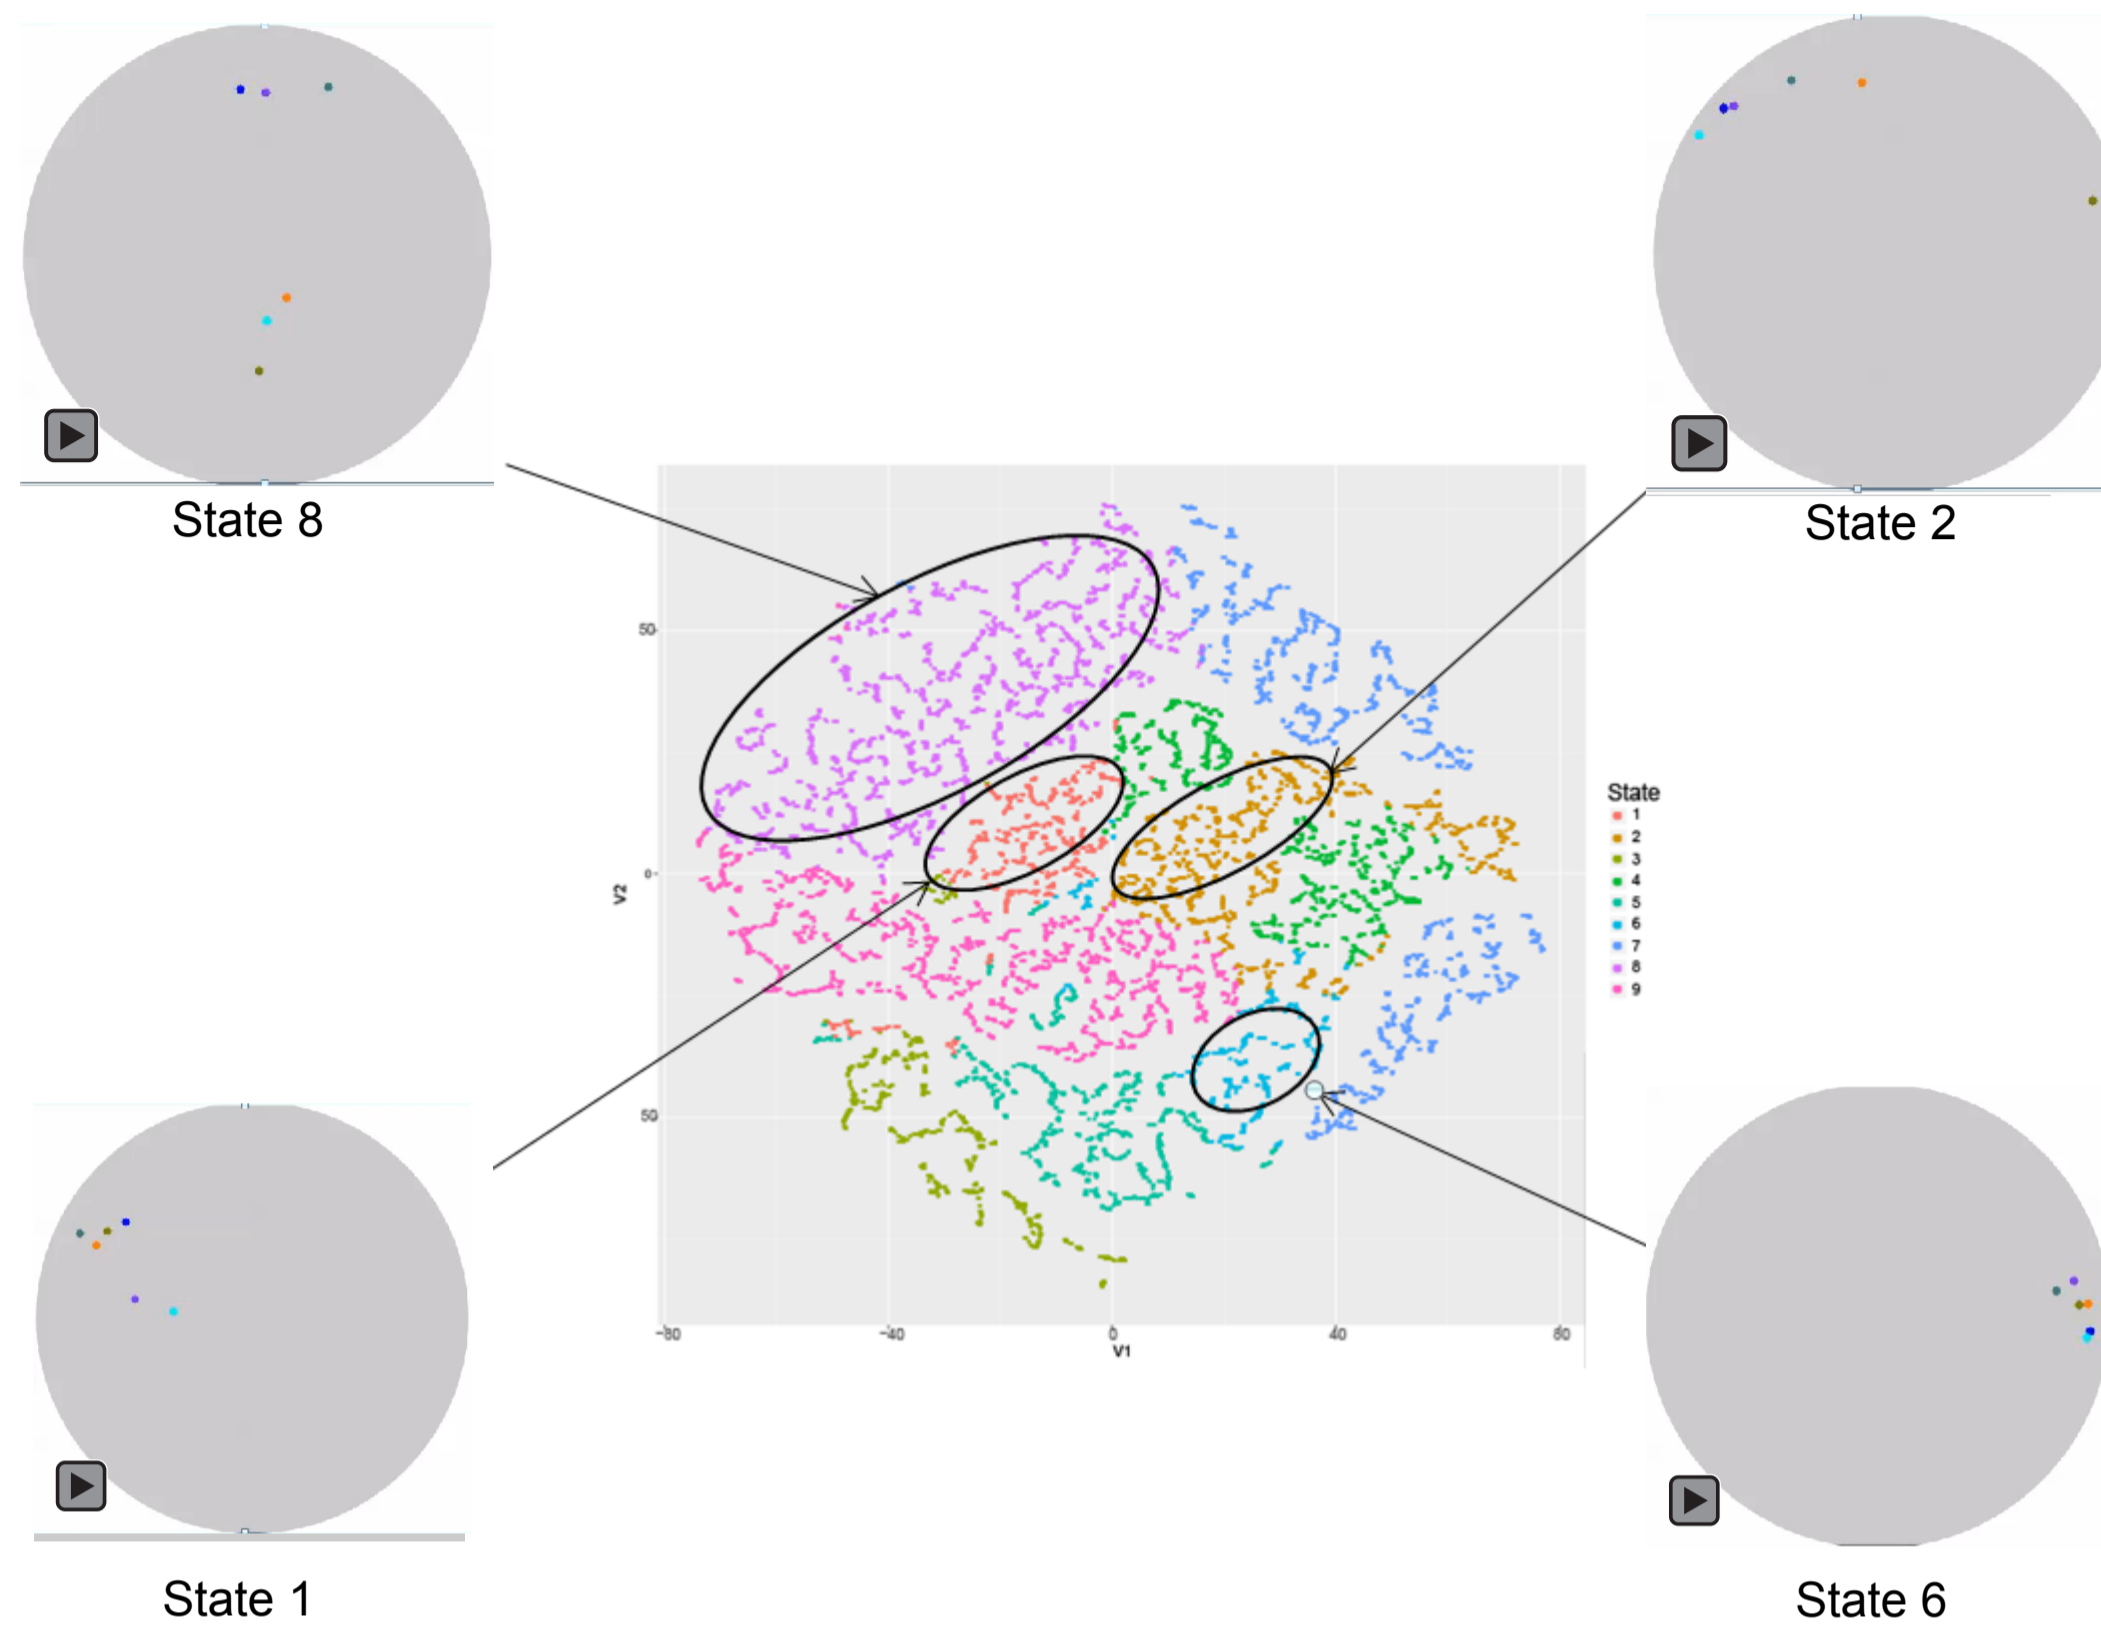

bioRxiv preprint doi: <https://doi.org/10.1101/350314>; this version posted June 19, 2018. The copyright holder for this preprint (which was not certified by peer review) is the author/funder. All rights reserved. No reuse allowed without permission.

b t-SNE plot for unpolarized states

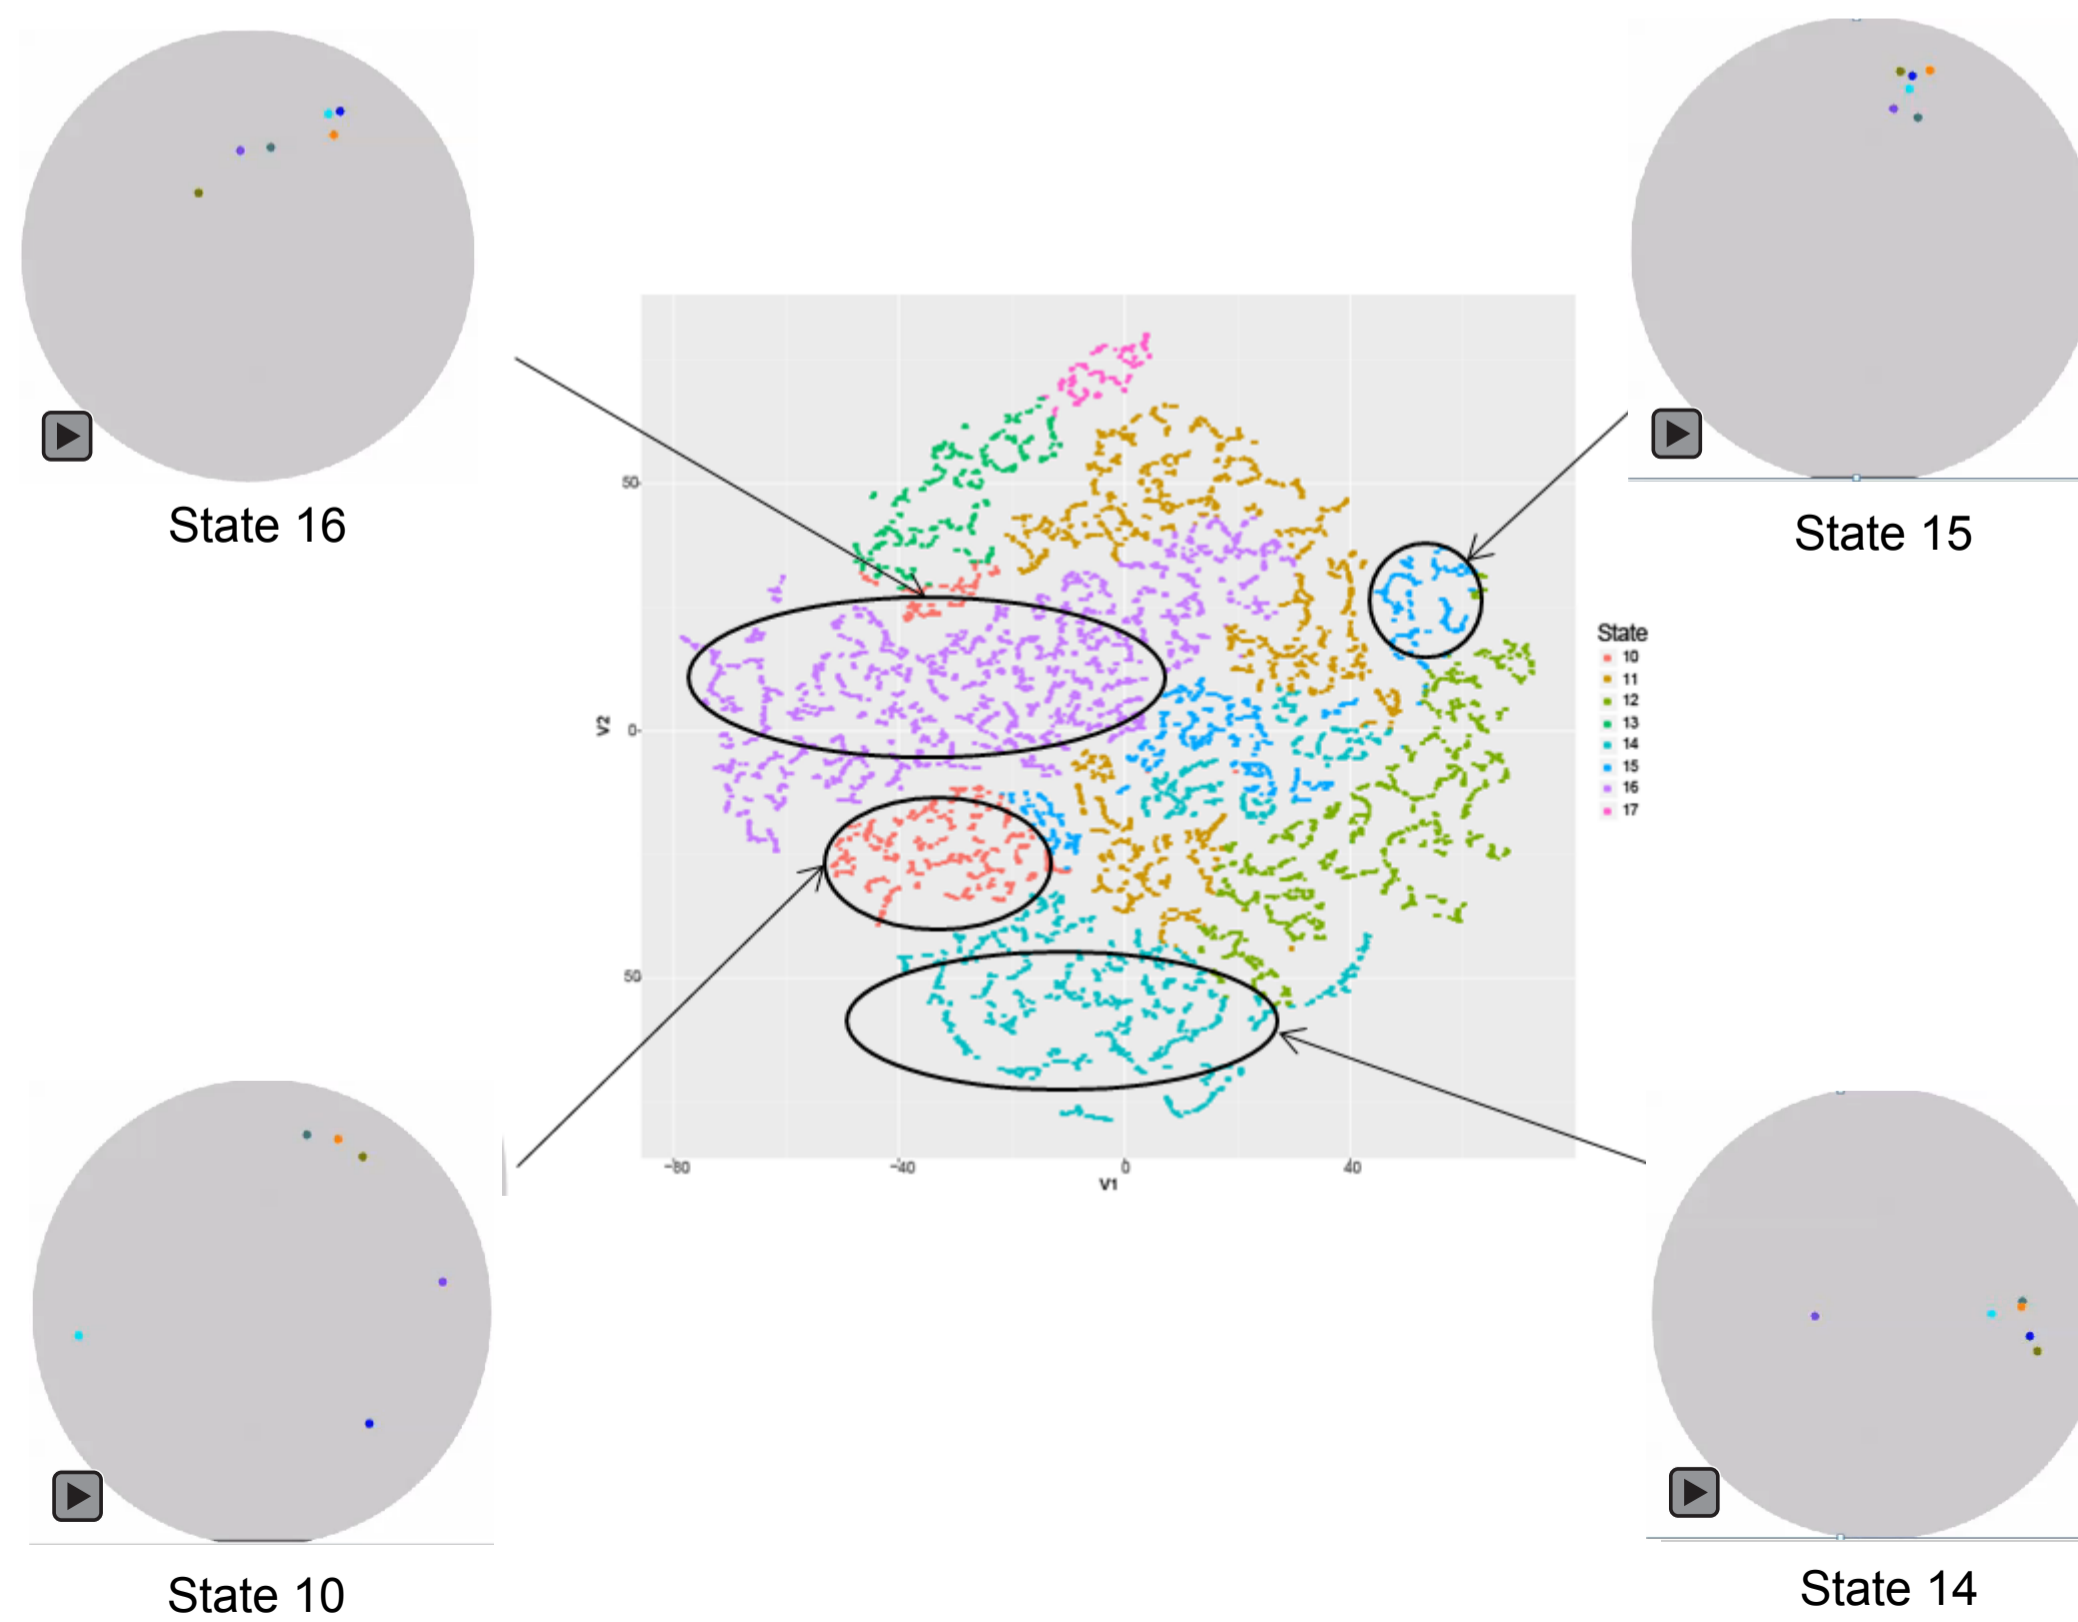

Supplemental Figure 10 t-SNE plots for (a) 9 polarized collective behavior states and (b) 8 unpolarized collective behavior states. Different colors in the plot represent different state clouds. Each plot shows the clustering of 5000 epochs (1 epoch=5 frames of recorded images) from polarized and unpolarized states, respectively. Videos show the collective behavior pattern of each corresponding state and can be accessed by clicking where shown. The colored dots in each video represent the centroid location of each individual fish.

| Zebrafish gene         | Human gene      | Description                                                    |
|------------------------|-----------------|----------------------------------------------------------------|
| <i>adra1aa</i>         | <i>ADRA1A</i>   | Adrenoceptor Alpha 1A                                          |
| <i>adra1ab</i>         | <i>ADRA1A</i>   | Adrenoceptor Alpha 1A                                          |
| <i>chd8</i>            | <i>CHD8</i>     | Chromodomain Helicase DNA Binding Protein 8                    |
| <i>chrm4a</i>          | <i>CHRM4</i>    | Cholinergic Receptor Muscarinic 4                              |
| <i>chrna2a</i>         | <i>CHRNA2</i>   | Cholinergic Receptor Nicotinic Alpha 2 Subunit                 |
| <i>disc1</i>           | <i>DISC1</i>    | Disrupted In Schizophrenia 1                                   |
| <i>dlg4a</i>           | <i>DLG4</i>     | Discs Large MAGUK Scaffold Protein 4                           |
| <i>drd1b</i>           | <i>DRD1</i>     | Dopamine Receptor D1                                           |
| <i>drd2b</i>           | <i>DRD2</i>     | Dopamine Receptor D2                                           |
| <i>drd3</i>            | <i>DRD3</i>     | Dopamine Receptor D3                                           |
| <i>drd4-rs</i>         | <i>DRD4</i>     | Dopamine Receptor D4                                           |
| <i>drd4a</i>           | <i>DRD4</i>     | Dopamine Receptor D4                                           |
| <i>esr2a</i>           | <i>ESR2</i>     | Estrogen Receptor 2                                            |
| <i>gnrhr4</i>          | <i>GPR150</i>   | gonadotropin releasing hormone receptor 4                      |
| <i>grm5a</i>           | <i>GRM5</i>     | Glutamate Metabotropic Receptor 5                              |
| <i>homer1b</i>         | <i>HOMER1</i>   | Homer Scaffolding Protein 1                                    |
| <i>immp2l</i>          | <i>IMMP2L</i>   | Inner Mitochondrial Membrane Peptidase Subunit 2               |
| <i>kctd13</i>          | <i>KCTD13</i>   | Potassium Channel Tetramerization Domain Containing 1          |
| <i>lrrn3</i>           | <i>LRRN3</i>    | Leucine Rich Repeat Neuronal 3                                 |
| <i>nfk1</i>            | <i>NFKB1</i>    | Nuclear Factor Kappa B Subunit 1                               |
| <i>oxt</i>             | <i>OXT</i>      | Oxytocin/Neurophysin I Prepropeptide                           |
| <i>sapap2(dlgap2a)</i> | <i>DLGAP2</i>   | DLG Associated Protein 2                                       |
| <i>scn1lab</i>         | <i>SCN1A</i>    | Sodium Voltage-Gated Channel Alpha Subunit 1                   |
| <i>shank3b</i>         | <i>SHANK3</i>   | SH3 And Multiple Ankyrin Repeat Domains 3                      |
| <i>slc18a2</i>         | <i>SLC18A2</i>  | Solute Carrier Family 18 Member A2, Vesicular Monoamine        |
| <i>slc1a1</i>          | <i>SLC1A1</i>   | Solute Carrier Family 1 Member 1, Sodium-Dependent Glutamate   |
| <i>slc22a15</i>        | <i>SLC22A15</i> | Solute Carrier Family 22 Member 15, Organic Cation Transporter |
| <i>slc25a27</i>        | <i>SLC25A27</i> | Solute Carrier Family 25 Member 27, Mitochondrial Uncoupler    |
| <i>slc39a11</i>        | <i>SLC39A11</i> | Solute Carrier Family 39 Member 11, Metal Ion Transporter      |
| <i>slc6a3</i>          | <i>SLC6A3</i>   | Solute Carrier Family 6 Member 3, Neurotransmitter Transporter |
| <i>slc6a4a</i>         | <i>SLC6A4</i>   | Solute Carrier Family 6 Member 4, Neurotransmitter Transporter |
| <i>slc6a8</i>          | <i>SLC6A8</i>   | Solute Carrier Family 6 Member 8, Neurotransmitter Transporter |
| <i>srr</i>             | <i>SRR</i>      | Serine Racemase                                                |
| <i>tph2</i>            | <i>TPH2</i>     | Tryptophan Hydroxylase 2                                       |
| <i>ube3a</i>           | <i>UBE3A</i>    | Ubiquitin Protein Ligase E3A                                   |

| <b>Associated psychiatric disease</b>           | <b>Rererence PubMed ID</b>   |
|-------------------------------------------------|------------------------------|
| autism, schizophrenia, ADHD                     | 19204725, 22037178, 19918262 |
| autism, schizophrenia, ADHD                     | 19204725, 22037178, 19918262 |
| autism                                          | 22495309, 22495311, 24998929 |
| autism, schizophrenia                           | 23490763, 14606695           |
| autism, epilepsy                                | 19204725                     |
| autism, schizophrenia, asperger syndrome, psy   | 15386212, 17579608           |
| autism, schizophrenia, cerebral degeneration, r | 25549968                     |
| autism, schizophrenia                           | 18205172                     |
| autism, schizophrenia                           | 22559203                     |
| autism, schizophrenia                           | 25224105, 19897343           |
| autism, ADHD                                    | 15892149                     |
| autism, ADHD                                    | 15892149                     |
| autism, asperger syndrome                       | 19598235                     |
| autism, fragile X syndrome, epilepsy            | 22542183                     |
| autism                                          | 22558107                     |
| autism and Tourette syndrome                    | 17043892                     |
| autism, schizophrenia                           | 22596160                     |
| autism                                          | 20678249                     |
| schizophrenia                                   | 27992301, 27759212, 22479419 |
| autism, asperger syndrome                       | 27242401                     |
| autism, schizophrenia                           | 27271353                     |
| autism, epilepsy                                | 12610651                     |
| autism                                          | 26886798                     |
| schizophrenia                                   | 28094812                     |
| autism, schizophrenia, OCD                      | 19360657                     |
| autism                                          | 22843504                     |
| autism                                          | 23116158                     |
| autism                                          | 22843504                     |
| autism, ADHD, epilepsy                          | 23979605                     |
| autism, schizophrenia                           | 23583772                     |
| autism, epilepsy, dystonia                      | 16601898                     |
| schizophrenia                                   | 19483194                     |
| autism, schizophrenia                           | 15768392                     |
| autism, epilepsy                                | 11543639                     |



## Supplemental Table 2

| <b>Zebrafish gene</b>  | <b>guide RNA 1</b>       |
|------------------------|--------------------------|
| <i>adra1aa</i>         | GGTTCCTTCCAGCCGAATAGAGG  |
| <i>adra1ab</i>         | GCAGCACAAACACGTCAAGAGCGG |
| <i>chd8</i>            | GGATGTTGATGAAGGCAAAGTGG  |
| <i>chrm4a</i>          | GCCAACTTCAGCTGTGACAGTGG  |
| <i>chrna2a</i>         | GTTCCAGCAGGAGACTGGAGTGG  |
| <i>disc1</i>           | GATTGTTTGTGTTTCAGTTCTGGG |
| <i>dlg4a</i>           | GGATGTGATGCATGAGGATGCGG  |
| <i>drd1b</i>           | TGGTCAGAATGAGGAGTGAGAGG  |
| <i>drd2b</i>           | GTCATAATAAGTGTCATTGTAGG  |
| <i>drd3</i>            | GCTAAACATTGCCATAAGTGTGG  |
| <i>drd4-rs</i>         | GCCCAGTATAGACCCAACGGCGG  |
| <i>drd4a</i>           | GTCGCTGGTCCACGTGTTTGCGG  |
| <i>esr2a</i>           | GGAAGTGGACTCAGGCCGTGTGG  |
| <i>gnrhr4</i>          | TGGCAGCCCACAACACGCCGAGG  |
| <i>grm5a</i>           | CCATCAGCCGCCAGCAGACAAGG  |
| <i>homer1b</i>         | AGAAGCAGCCAGAATAGCCAAGG  |
| <i>immp2l</i>          | AGATCATCAAACGGGTCATCGGG  |
| <i>kctd13</i>          | GGGTGGTGTGGACCGATGCGGG   |
| <i>lrrn3</i>           | GGAAAGTCGGGGGTTGTTTGTGG  |
| <i>nfk1</i>            | GGGGCTTCAGGTTCCGCTATGGG  |
| <i>oxt</i>             | GGAAAGGCCTGCGGTTATGAGGG  |
| <i>sapap2(dlgap2a)</i> | GGAGACTCTCGCTCAGACAGCGG  |
| <i>scn1lab</i>         | GGTTAATCTCATCCTGGCTGTGG  |
| <i>shank3b</i>         | AGGAGCCCCGGGCCAGATGG     |
| <i>slc18a2</i>         | GGACGACGAGGCTGCTCAGATGG  |
| <i>slc1a1</i>          | AGATGCTGGGGAAGAAAGAGCGG  |
| <i>slc22a15</i>        | GTCTGGAATGGATTTAGAGGAGG  |
| <i>slc25a27</i>        | TGGTTTTGGTAAGATCCAGGGGG  |
| <i>slc39a11</i>        | GCCTGGAAACATGCTGTCTGTGG  |
| <i>slc6a3</i>          | GGAGTACTAATTGAGGCCATCGG  |
| <i>slc6a4a</i>         | GATGATGAATCAAGAGTACGGGG  |
| <i>slc6a8</i>          | CGCCCTGAATATGGTCCTGGTGG  |
| <i>srr</i>             | TGTCGTACCCTATCCAGATGTGG  |
| <i>tph2</i>            | GGTGAGAGATATCCAGCCACAGG  |
| <i>ube3a</i>           | GGACCTGCCACCCACAAGGGAGG  |

| <b>guide RNA 2</b>      | <b>guide RNA 3</b>      |
|-------------------------|-------------------------|
| AGAGAATCACCCTAGAGGGAGG  | GTATTGTCGTGTGTATGTTGTGG |
| GATCCACAGAGATTACGCAGAGG | GCAAAGGAAGGGTATTGCAGCGG |
| TGGCTCATGTGCAGCGGTTGAGG | CGAGAGCCCGTACAAGACGGTGG |
| GGATGGAGAGGAGATGGATGTGG | AGACAAATGCAGAGAGGTTGCGG |
| TGTCCTCCTCATCATGCAAATGG | TGGCGAGAAATGGCTGACAGAGG |
| GATGCCATGGAAAGCCGCCACGG | GACGCACAGATTCAAGATGGAGG |
| GGCAATGTGTTGGTGTGTATGG  | GACAATGAGGTAATTAGTGGTGG |
| TGAGCATTCAATCACCCCTGGGG | GACCACCACCAACTACCTGGTGG |
| AGACCCAACGGCGGCCACGAGG  | AGCGTTCGGTCAGCACACTGAGG |
| GGCTAAGGCCAGGATCCACGTGG | TGTTGATGCCGAACATCACGGGG |
| AGAGGATGAGTTGAAGATGGGGG | AGGGCGATGGGATGCAGATGGGG |
| CGGCGCCACACTTGCGCTCGTGG | GCAGTATGGCATCCAGCGGGTGG |
| GTCTCTAGAAAAGATGGAGCTGG |                         |
| GGGTGTGAGGGCCCGTCTCACGG | GGAATTGCGGTTCTTCTCGCTGG |
| GGTGCTCGATGGAGAAAGAGGGG | GCTGAAGCCTGTACACGTGTGG  |
| GCGGAGAAGCAGAGATGTGAAGG | AGGGTTTGCTGAAGAGGAACTGG |
| GAGGAGGCTTTCCAGGTGGTTGG | TGCATGTATCATTAGTTACCTGG |
| GGCAGATCTGGAAAGAATGGTGG | GCCCTTGAAACTGTGGCAAGGGG |
| GGGCCTGAACCAGCGGACTGAGG | GGAGAAGATGAAGACCAGTGCGG |
| AGAGAACGGCAGGCTGGTTGTGG | TGGAACATTTAGGACTCTGGTGG |
| GTCAACGGGACCCTCAACGGGGG | TGGGTTTTGCAGTGGGGCTGGGG |
| CGTACCCTATCCAGATGTGGTGG | GATGTGGTGGTTGTTTGCTGTGG |

| <b>guide RNA 4</b>      | <b>guide RNA 5</b>        |
|-------------------------|---------------------------|
| GAAACGCGAGGACTGATCAGCGG | CGCCAAGACTTTGGGTATCGTGG   |
| GGTTCCCTCCATCCAAATAGTGG | GTA CTGTAGGGTGTATGTAGTGG  |
| GCCCAGTGGTGTGTGACCTGTGG | GAAGGACAGGATCCAGGCAGAGG   |
| TGAGTCAGACAAATGCAGAGAGG | GCTCCAGCATTGTTGGGACATGTGG |
| GTTCTCCACAGCAGGCGACTTGG | GTCTGAGCCGATTAACCAGCTGG   |
| GCGAAAGATGACACCCAAGGTGG |                           |
| TGGCCACATTAGTTATGCCCTGG |                           |
| TGCCCAAGGCATGACCAGTGAGG |                           |
| GCCGCTTTATGTCTACTCTGAGG |                           |
| GGGCCTGAGGAACTGGGAAGAGG |                           |
| AGGGCAGAGTGCTGAAGTCGTGG | TGTGCTGTACCCAGCAGAGCGG    |
| TGAGCGGGTCTGCGTTGATGCGG | GGACTCTGGTCTCAGCCGAGG     |
| GCACTTGTGGGTAGGACTTGCGG |                           |
| GGACAGTCGGACTGGTTTTGAGG |                           |
| GTGGTGGTTGTTTGCTGTGGTGG | GTTGTTTGCTGTGGTGGTGGAGG   |

| <b>PCR primer F</b>         | <b>PCR primer R</b>          |
|-----------------------------|------------------------------|
| TATGAGCTTGTGCGTGATTTCT      | TCCCAACATTGACAGGTATTGA       |
| ATCCTCCTTCCTGGTGTCATT       | CCTTCGATCCGTGACTCATTAT       |
| TGTTCTACTGTACGTTGCCAGC      | CAGGCCGAGGCTGATGGAAGAGC      |
| GGTTGGAAGGAAGTGGATGTAAC     | TCATAATGAATGTCATGCTGTTCC     |
| AAAGTCTTCATCCTCAGCCCT       | TCCATTGTCATTACCGTTTTTG       |
| TGCATTTCTCATTGCAAGTTGG      | GCTTGATTTTGATTGGCTTACC       |
| CTATGACGATTGTTTCAGCCCAA     | TGCAAGATCCAGCAGTTCTAGAAA     |
| AGGAGGAGATGGCGTATGTC        | CAGCATAACTACGGACAAACCA       |
| TATTTGCATACTCACAGGCTGGG     | AATGACAACCTCAAGATATGATGG     |
| CTCAAGTCACCAAGCAAGCA        | TTGCAACATAGGTCAAATGGTC       |
| TGAGGGCGCTTGTTTCATATT       | GCTGCCATGAATCCATCTTT         |
| AAGGGGCAAACCTGAAGGACT       | CCAACATGGACACAGGATCA         |
| AAGGCTTGTGAAGGGTGAGTAAAC    | GAAGTTCACCATGACACACATCAAC    |
| CCAGAGGGTTGAGAATGGCCGAC     | CCTCACTGTACAGCAGGGTGTCTG     |
| GGTTTTTCATTTGCTGGTGTTT      | GGATGGCCACAGAGCTGGAT         |
| CACAAAAAGAGAGTCAGAGGCAAATAC | ATTTGCAAAGGTAATCAGGGTGTT     |
| CCTCCAATAGATAAGACCCATCTGG   | TTTCAAGCTTTATTTTTATGGTGA     |
| TGTAATCCACCAATCATGCTTCTT    | AAACATAGTAAGTCTAAGGGTACACGCC |
| TCAAGCTGCTCTCAGACAAGTGC     | CCATTTCTCGTGAATGCACCTGC      |
| CCGAGTTCAGAATACACGTTTAC     | CCATATCAGTGCATCCCTAGCAT      |
| AGGAACGGTCATAATAGGTTTCCC    | TATCTAGCGCCTTTACAAAGTTGG     |
| ATGCACTACAGTTCACATCAGGAC    | AGTGAGTGATATGATCTCCGTGGT     |
| AAACTCTTCCTCTTTCTGTTGAGC    | TAGGCAAGTCTTCATCACTGACTC     |
| TTTGTCTTCAGAGAGCACAGACTC    | TATGGAAAGGCAGTTTAACCAGAT     |
| TTTTCAGCACGGTGGTTATG        | TTAAACTAGCGGCTGTACCTG        |
| CCTAAAGATGGGCTATGTCTGAA     | GGGATTTTACAGTGTACTACTGG      |
| CAGTCTCATCAAACAACCTTCG      | AAGACAACGTTTGACCCTCAAT       |
| CTGGCCATGACTCACCATTAT       | AAGTTCACCTTTATCAGCCTGTGC     |
| TGACACCAAATACTCCTCAAAA      | CTGTGGTGTTTCATTGTCCTGT       |
| CACTGTAATGATGGAGACGAGTGG    | ACTTGGGGAAATGTTTCATCGTAGG    |
| ACTCTGTTCCACCCCTTAACC       | ATTTGACCTTACCCCTCCAT         |
| GTTCTCCACCGTGTCTGTGAC       | AGATCCCTCGCACCTGAAGA         |
| TACCTCCTTCTGGTTCAACTCC      | TTACTCTGACTGTGCTGGTGCT       |
| CAGAAGTGGTGAAGGACAATGACA    | ACAGGTGTAAAGCCAAGTCAAACCT    |
| ATGTCTGATACAGGAAGCGAGCG     | CTGCTGGCCTCACTAACACCACT      |

## Reference sequence

TATGAGCTTGTGCGTGATTTCTGTGGACCGATATATCGGCGTTAGCTATCCTCTACA  
ATCCTCCTTCTGGTGTATTCTGGGCTTTTCGACAGTGGATACGTAGAGTCATTCC  
TGTTCTACTGTACGTTGCCAGCAAAGTGTGTGTGGATGTTTGTGGTATAACCG  
GGTTGGAAGGAAGTGGATGTAACATTCCCCAGGTGCTACGGTTCGGGCTCCGACG  
AAAGTCTTCATCCTCAGCCCTCAGATGATCAGCGATGTACCGCACCCCTTCCAGAGC  
TGCATTTCTCATTGCAAGTTGGTTTCATTTCTCAACAGCTGTATTGCACGGATCAC  
CTATGACGATTGTTTCAGCCCCAAGTTCAGACACGCTTTCCGTCAAGCATTGACGCT  
AGGAGGAGATGGCGTATGTCCGATTAAGGCTGGAGTCGCAGTTATCTGGGGGAAGT  
TATTTGCATACTCACAGGCTGGGGTGGGGTGTGCTCAATGCTGTGTTCTTTTCTT  
CTCAAGTCACCAAGCAAGCAGCATGTCATCTTGAGCAGTGAATTGTTTACCGAGAAT  
TGAGGGCGCTTGTTTCATATTTATGGCTTCATCTTGTCATAATTCCTCTTCTGTAACA  
AAGGGGCAAAGTGAAGGACTACCATAAAATATGGGTACAAACAGTTTAAATTCATGT  
AAGGCTTGTGAAGGGTGAAGTAAACAGTGGCAGAAATTAATTATGTGAAGTATTCCT  
CCAGAGGGTGAAGTGGCCGACTGTCTGTCTAGGCTTATGACCACGGTCACAAATC  
GGTTTTTCATTTGCTGGTGTGTTGTGCTGATTGGGAACAGATTGGGTCCTACCCGGAT  
CACAAAAGAGAGTCAGAGGCAAATACTTTTTCACAAATGCATCATTGTCAGCTC  
CCTCCAATAGATAAGACCCATCTGGTCTCTGAAACTGTCCCTAATGCCCCATAATCC  
TGAAATCCACCAATCATGCTTCTTAATTTGATGTAGCGGTTAGCTAACTGAACTAAC  
TCAAGCTGCTCTCAGACAAGTGCGGAACCTCAAATTTCTGGACCTTAACAAGAATCC  
CCGAGTTCAGAATACACGTTACACTAGCTAAACGTACCATACTATGACGTCAAACG  
AGGAACGGTCATAATAGGTTTCCCTTACCATCTGCAGTGTATGCCGTGTGGCCCCGC  
ATGCACTACAGTTCACATCAGGACAGCTTGCGGGACGACGGCTCCACTTCTCATGG  
AACTCTTCTCTTTCTGTTGAGCCTCCTCTATAGTGGCCTGGTTCTGCTCATCATAC  
TTTGTCTTCAGAGAGCACAGACTCCGCTCATGCAAGCAAACCACGTTGTGGGGTGG  
TTTTCAGCACGGTGGTTATGTTGTTTCTCTATTTTCATCTCTCTAGTGCCTATTATCC  
CCTAAAGATGGGCTATGTCTGAATTCAAACACACTAAAATGTGTTGTATTAACCCAAC  
CAGTCTCATCAAACAAGTTCGTCCTTTGTATCACGTGGTTTCATTCCACGTCTGCGA  
CTGGCCATGACTCACCATTATAACAGTATTCATACTGAATAATTACTAATTTAGCT  
TGACACCAAATACTCCTCAAATATCTTCTTAATTCCTCTAAAGAAACGAGCAGATTT  
CACTGTAATGATGGAGACGAGTGGCTGGTCACACTGTCTGAAAACACATCAGTCTCT  
ACTCTGTTCCACCCCTTAACCCCTTCTCCAGGCTCTCTATCCCCTCATGGGCACGA  
AGATCCCTCGCACCTGAAGAGGAACAAAAGGGACATCTTGGTGTGAAAAAAACTC  
TACCTCCTTCTGGTTCAACTCCATAGATCTTTGTGTCTTACAACCAGACAGTTTGAT  
CAGAAGTGGTGAAGGACAATGACAGGATTGTGTGTGTGCTAGTACTCACGGCTCTG  
ATGTCTGATACAGGAAGCGAGCGGCTGCAAAGCATTTAATTGAGCGCTACTACCACC



3TACCCATCTATTGTGACAGAGCGACGTGCATTGCTTGCGCTCATAGCTTTATGGG'  
CTGCTCACTTAACCCATTTCGTCTCCCTGCTCTTACTCATTGCACGAGTCTTGTGTCC  
3TTTTACATCACATTTTATTTCAACTGCACACAAGCAACAAAAGCACAGATTCTGAAT  
;ATAAACTGCCAGAACAGGATAGCGGGAGCCCACAGGATGAAGGACAGGATCCAGC  
;TCGCAGGACACACGGTGAAAACAGCAGACCAGGCTCTGACACCAGGTTACCAAGC  
ACTAATTTTATTGCTCAGTCACATGAATGCAGCTGTCATGGGTCATTATTTGTTTAC/  
GAAGCCCCGTGTGAATGGGGCGTTAGACCAAAAAGCGTGGAGATGAATGTGTGCA  
TCGCCATAGGTACCGTTAAGCTCTGTATAACTAGTCGTCTGGGCTTTGTGCCAATT  
TTGTTTGCATGTTTTTGTAAAGCTTTTGTGCATATCAGAATATTTATTCTGGTATTTGG(  
TTTGCAGAATATAAAATTCAGAGATGTCAGTAGACAAACACAAGGATTCAAACAGAT  
TATGGGCAAGAACACAAACACGTATTAGCATATATTACACACACAAAGAGCCATCCA  
TAAATTTTCAAGTCTTTGTTACAGTAAAATATTAATAATAATAATCACCTCATCTTTTTG  
TTAAGAACATTCCATATGGAGTATTAAGCTTAAACCTACCTGTTTTCTCTTCAACAT  
3CACAGGAGTACATAGCCACGAGCTTCAGAAACATTAACAATCTGCAAGCCAGATC'  
TTTAGCCGAGGCCAGGCTAGTGAGCGACGAGTTTTGGCCCACATTCCTGGAGAC  
3CAAAAATTACAATGGACGCGAATCACATTTAATCTTTTCTCTTCTCAGTTCGCAGA/  
3ACTGAGCTCAGCAGCATCCTCAAATAAACCGCTAGCAGGTCTGTCATCACTATGC/  
AGATGCAGAACTAGCTCAGAGATGCACATTTAAACATGTGTCCATTTGTATTGAAC  
CATCGAGAGGATCCAAAGGGGTGACTTTGTGACATGATCCATTTGAAAGAACTTG  
AACCCGGGTGCGGACCAAAAGTGCTAGTATGAAAGCACCCCTAAATGAATGAACAAA  
3GGACCGCGGACGCTGTTTCGGCCCCAGTATCTGCTGTGGTGAAGGCATCGGCTG  
TGGAGGAGGTGGCGGAGGAGGGGTTAGCATTGTTAGCGGGGGTGGCGGATCCGC  
;GCCATGGCCACCACAGCCAGGATGAGATTAACCAGATAGAAGGAGCCCAGGAAG/  
3GCGTGGTCGCCCCCGCCATCTCAGGGACCCACTGCTTAAACAGTCATCAGACAG'  
3AAGTTACCTGTACACGGTGGACGACGAGGCTGCTCAGATGGTTAAGAATCACTCC  
;AATGAGTCAATAATGGGCAATAATTACAATTCTTTTACCCAACTGTTGGGTTTATC/  
VAGGGAAGCCAGATTTACAGCGGAGCATCTGAAACCTCGACTGCTATCAAACCCCA.  
TTTTTTTTGCACATGCAGCTAAAGATTAAGTTAATTTAGATTTTGGTTTGTGCATTGA1  
3AGTGAACATTCTCATTTCTCAGAGTCTCTGCATGATATTAATGTGCATCAGCACAG  
'AACGCAGCATCAGCTTGCTGGAGAAAATGCTGCAGCTCACCGTAAAACCAGGCGA  
TATCAGTCAGTGCAAGAGGACCACCATCTCAACCCTAACAGCAGTCCTCACCATGG  
3ACTTAATCCAAAAACAATAAGAGATCAAATATTTATTTTTGACTGCTGATTGAAGAA(  
GGCAGCGGCCACACCAGAAAGTAACCCTCCACCACCACAGCAAACAACCACCACA'  
3TGTATAGAGAGGGTCTGTGCTGTGACGTATACTGAGTGCAATTAACACTCGA'  
3AGTTAACAGAGGGCTGTGGAAATGAGGCCTGCACGAATGAGGCTTGTGGCTCTTC

TACTGTCCATCACTATTTCCATCGGACCTCTATTCGGCTGGAAGGAACCGGCACCG  
GGCCACTACATACACCCTACAGTACATTGCCAGAATGACTGCCAACGGAACATAG/  
TCTATTTTTCTTTTTACAGCCAGTTGTGTACTACCTGGTGAAGTGGTGTCTCTAC  
CAGAGGCAATCATGAGGCCGGCCATCTTGGTGGTTCTGCGTGTGGGGTAGCTCA  
TTAGCAGGATGCTGACAAAGATTCACCACATGTCCCAAATGCTGGAGCTCATACTT  
AAAAATGCCATTGTGAAAGTTTGCATGTCGGATATCCAGCTATAAATTACTTCTCAC/  
CATGTTGTACTCACTGCTGGTGAGGTCTGGTGGGTTGTAGTTGTTGGTAAGGTACA/  
TAGCTGCACAGGGATGAAGGAGATAAGGATGGACAGCGTCCATGCCACGCTTATC  
GATTATTTAAGTCTGCTTGATGACCAAATAAACTTATTTGACAAAAAAGTAACATA  
GTACAAAGATGTTACACTGCATGTTGTCAAGCATTTATTTGCAAAAGTCAAAATCT  
TCTCCATAAACAGCCCCCTCTGTGTCAATCTTTCCATCTCGCAGATGTTGAATCCG/  
TCTCCAGGTTTCATCGCCGTCTCCATCCCTCTAAATTACAACCGCAAACACGTGGAC/  
GATCATGTGGTGTATGTTCTGTCCAAGTCCCAGTACTAGCATGGTTCTGTTGAAGT/  
TCCCGCCAGCCACTGAACTGTGATGTTCCAAGCTGCATCCACTGGCATCACGATGA  
ATCATTATCGGGGCACTTTTCTCCGTCCACCATCAGCCGCCAGCAGACAAGGTCCA  
TAAATTTGCAGAGTACAAAGAAGCAGCCAGAATAGCCAAGGAGAAGTCTCTAGAA/  
AAATGTACAATCTCATATCTCTTACAGGAGCCCAAAGAACCCTCAGCAGAAGATCA  
GGCTGGGTGGTGGTGGACCGATGCGGGAGACACTTTTCCCTGGTGTGAACTTCCT  
GTATTAACAGCATGCCAGAGTTAGTTTCAATCGACAGCTTCGCCTTGCATAACCTAC  
TGAATGAATGAATGTGTGATTTACTGAATGAATGAGTCATTAACGAGTAAATGAGT  
CTTGGTTCGGCTCTCCAGAAACCCTGCGCTGCCTGGAGGAGGATTTTCTCCCTTCTC  
GAAGATGAACCGTATTCCTGCGAACCTCCTTGACCAGTTCGAGAAGCAGCTACCG/  
ATCACAAGAAACAAAGAAGATCATATAGGGCTTTCCAGCTGCACGCAGAGTCTGTAAC  
TGAGCTGCTTCCACACCCACCCAGCACAGGCCCCAGCCGTCTCGCTACCTATTCC  
ATGACCCCTCTTTCTCCATCGAGCACCTTTCAGAGCATTGTGTCTTTGTATGACAAC  
CACATCTGACCCAACGTTTTGGTTAAAACAACCTCATTTTTTGTTCATGTGAGGAGGCC  
ATTTAAAGATGAAAATATCCAGTCCGGTGTTCATGCAGTTGGATGAATTGAGTCTGGA/  
GTAGTTGTGAATAAAGTTCATAACACATTACCTATATGTCTGTAGATAGCTGGTGTG  
CTGTGGAGATCAGGATCTCCTCACCTGTCTGCTGGAGAAGATGAAGACCAGTGCG/  
TGCCGATGGCCTCAATTAGTACTCCAAAGAGAATTGACGTCCCCGCAGCGAAGTG/  
ATATGAAAGAGTCGATGATGATGAATCAAGAGTACGGGGGAGAGCAGCAGAAAGT  
GTCCTTCTTCTCGAGTCTCGTGAGGAGGTTTCGTATTTGCTTTGTTTACACGAGAG/  
TCTGGATAGGGTACGACATCCAGGATCTCAAACCTAAGCTACAATTGGATTAAT/  
TAAGCCAGTCCAGCCAGGAAGTCTCGTGGTGGAGAGATATCCAGCCACAGGCCTTAC  
TCCGGGTTTCCAGCGCATGGATAACAATGCAGCAGCCATCAAGGCCCTGGAGTTA

GATGATGAATCCATATGCAAGATAACTGAGGAACCCGGTTATGCCATTTTCTCAGC  
AAGGAGCATGCAGCAGAGAAGATGGCGTATCCTGGATCTTCGTTAACTCTGCACAC  
CCTATGAAGATGCTACTTGGGAGCTGAAGGAGGATGTTGATGAAGGCAAAGTGGA  
AGGGTTTGGTCACACAGAAGTATCGGTCTGAAGCTGATGATTAGCAGGTTTCATGACT  
CTGGAGTAAAGGCTCTGAGTCAGACAAATGCAGAGAGGTTGCGGATGGAGAGGAC  
AGTTGGTTATTGAGACTAAGAAGTTTAATCTGTAATCTGTGCTCAACAGGTGGTGTG  
AGGTTATTTGGCTTGGCCACTCTGAGGTAGACCACCTCTGCTGTGTTTTTCAGCGCT  
ATGATGAACGCCACCTTGGGTGTCATCTTTCGCTCATAGCGAAACGGGCTTGAAT  
CTATAACAGGCATATTGGGATGCAGCAACAGTCTGTGGTTACTTCTAGCAACCCC  
GTCCACCCTCTCCAGATCTTCCACACTTATGGCAATGTTTAGCAGTGGTGAATGGC  
GGTTGGCAGCTGATCTTTGGGGCATCATGGTCAATGTGACGCCCAGTATAGACCC/  
CAGCGACAGATTGTCCTGCTCTCCGCCACGTGGATCCTGGCCTTAGCCGTGGCCT/  
CGACTCTGTTGTTGCAATGTGAGTGAGGAAACATGGCTGTGAGGTGGCCAAAATAA  
AAGTCACCAGCAGGTCGGCAACGGTGAGGTTTCATGATTAATAATTCGTACATGGGA/  
ACGAGCGCAAGTGTGGCGCCGTCCGAGAGCAGTATGGCATCCAGCGGGTGGAGG/  
AAGATGGAGCTGGCAAGTTCGCCCTCTCAGGTAAGTCGTGAAATGTCCTGCTACTT/  
TCAAACGGGTTCATCGGGATCGAAGGGGACTTCATTAAGTAAGTTTGTGAACAATT  
GCGGGACGGGACAGTTCCTTTGCCAGATAGCACGAGGGAGCTGGAGGAGGTGTT  
CAGAGCTTACCAAATCGAAGCCACAAACAACCCCCGACTTTCCTATATTCACCCA  
TTGATGAATGAGTGAATGATTAATGAATGAGTCAATCAATAACAACTAAATAAATC  
CCGTGTGAGATGTCTGGAAAGGCCTGCGGTTATGAGGGACGCTGCGCTGCTCCTG  
ATTCATAGGGATGGTTTCCACACGCTGCAGTACCAGCGCACGTCTGCCACCACCAC  
BAGACACAACGCACATACATAAAACAAACCAAATTAACAGTTTGTATCGTGCTTTA/  
CAAAGACGTTCCAACTGTGGGGGGAGGAGCCCCGGGCCAGATGGGGTCATCAC  
CACCACACGTGTGACAGGCTTCAGCCCGCAGATGAGCACAGCTGGTCCAATGAGC/  
BAAATGAAGAAAAAGAAATGAATATAAACGACCGAGCAAAGGTTATCAAGAAAAGAG  
ATGGATTTAGAGGAGGCTTTCCAGGTGGTTGGAGAGTTCGGAAGTCACCAGAAGCC  
BACCCCTTGCCACAGTTTCAAGGGCCCCTCTTCTCGCACTATACCTGCAGCTGTGC/  
GCTCCAGCTGCAGTCAGCGCCAGGTGAACAGAGTCCCCAGCAGGGCCTGAACC/  
BTCCAACAGCGTAAACACATAGATTCCACCCTACAAAGAGAGCAGCAGAGTAAACA/  
GCCGGAGTCTCAAGAGAACGGCAGGCTGGTTGTGGATAGCGTTCCGGAGAAGGA/  
ATGGAGAAATCCTCTCTGGACGCAGACTGCTGCGCCCTGAATATGGTCCTGGTGG/  
ACATTACATTATTTGTGTTCAATATATTGCAAAAATGGATCAAAGCTGTTTCAAAA/  
CGGTAAACCCTGACCTCTCTGTAAAGAGTCACAACCCAGACATCCATATTGAAGAG/  
TATAAGAATAATGCCAACTGTGTGATCCTCATCCCTCTAAGAAAGGAGCCAGTTC/

TTTGGGATCTTTTTACCTCCCTCTAGTGGTGATTCTCTCAATGTATTGTCGTGTGTA  
CGACTCGTCTTCTGGCATGGGTTCCCTCCATCCAAATAGTGGCCCGACGGAGATA  
AGAATTCAGGAAGATTGAAAGCCGCCAACCACGACTCAAGAGAAGTGTGAGATACT  
GAAGCGTTGCTGACCACGTAATCCAGCGCGAGCCACAGGTCACACACCACTGGG  
ATGGATGTGGATAAACCAATCCCAAACCTCCATATCCTGACAAACCAGACCATCCAC  
AATCCTTCGGGAAACCACCGCAGGAGGAGCTTCAGACGGCCCGGATACATGCGG  
CCACCGCATCCTCATGCATCACATCCTCCAAACACACATTATTCACCTGCAGGTC  
GGCCAGTAGCGGTCCACACTGATGACGCACAGATTCAAGATGGAGGCAGTGGA  
GAAATCTGGCTCCGTGTGACACAATTAATATTTCTTACCTCAAGATACACCACCCAG  
TCTGGAATGACTCTGAGCATTCAATCACCCCTGGGGGAAACTACAGCCAGCGTCA  
ACGGCGGCCACGAGGGGTACAACCTACCTGGCTTTGATATGTGGCGTGCCTCTC  
CCCCGTGATGTTTCGGCATCAACAACGTCCCCAACCGGGACCACAGCGAATGCAA  
AGTCGGGCTTAGCGACTGGCGCACAGACGAGCAGTCCGATAAAGGCGATGTGCT  
CTTGCGCTTGTTGTTGGTGTGGCAGCCACAACACGCCGAGGTTGCACACAGCT  
CATGATGCACACCCTGGACCGCATCAACGCAGACCCGCTCATCCTTCCCAACATC  
CAGTGTAATGTATGTGCATGAAATGATGAAAATCTGCTCAGATTATTTTAGCAACAC  
GTTAAAATAAACATACAGTTTAAATCTGATGAGGCCAAAAGGGTTTTAATGGCAG  
GAAGGAGGCGCAATACTACAGACTTCAGGGTCTTGTGCAGCACTGCCTCTCCACA  
AATGCTTTTTCTCAACTCCCAAGACTGGAGTCCTTGATGCTGAATAGCAATGCCCT  
AGTAGATCAATAAGTAAATGAATCAGCTCCATAACATGAGAAGAATAAAATAAGTAA  
GAGTCTGCTGCGACTCGGGTTAGTTTCAGCTCAAATTCATTGACTCCAGAACAAA  
CAACAGCGAGCAGCGCAACGAGAGTCCCGGGCGCATTTCGCCACCTGGTGCCTC  
CGCAATATAGATTGTTCCAAGGCAGCTTCCCAGTAACAGGAAGAATCACAGAGTCA  
ATGAAAGTCGGCCTGCTGCTATGGGGGCAGAGTTGCTTAGCAAAGACACTCATT  
CTGGCTCCTACTTTTGTGAGCCCTCAAACCAGTCCGACTGTCCCAAAGCAGATGA  
ACGGAGAAAATAGAAACAGCAGCAGCAGATCATCATCACTTCACCCCTCCCTCTCT  
AATGATCACAGTGCTGGTGTTCCTCCAGGTAACATAATGATACATGCAAATGCATAA  
TCAACATGCCCTGTATTTCTGAGTCTGTACGCTTCCACCATTCTTTCCAGATCTGC  
ACGGACTGAGGCCTGGAAACATGCTGTCTGTGGAGAAAATCAGGACACACTGCA  
CGTAGATACCACCCTACAGAGAGAGCAACAGAGAGATGAAGACACAGTGATTAACC  
TCAGAAATCTGGCTCTGGGCCTGGGCAAGTCTCCAATGGTTATCGCAGTACATCTC  
AGGAGAAGAAGGGCCATCTCATTCCCAATGGAAACGCGCACCCAAGCGTCAACGG  
GTACCGTTATGTACATTTTAGAAAAAAGCTTTAGGACTACAGCACCAGCACAGTCA  
GCTTATGTTTTTTGTTAAAGAATAAATATATAGTTAATCAATCATTAGCAGAAAATAG  
AGCCTTCCCGGAGAACAGTGCCAAAGGAGCTCACAACCTCTCTGCTTGCAGCAACC

TGTTGTGGCGAGGAGGGAAACGCGAGGACTGATCAGCGGACAGAAAACCTGAGAAC  
3CAGCTGAAAGGGCCCAGAGAGCTGCCACTGCAGTCATTGCCCTTCGACCCGTAG  
`GTTTTGTCTGGCTCTTTCTCTCTTCTCACTGGATCATTTTTATCCTGCCTGTATTTT  
3CAAGCGGCCAGTAACCCTTAATGATGTAGACGGTGTAAAGGTTTCATGGAGAACAC  
3TCCAGTCTCCTGCTGGAACCAGCTCTTGGATGTGCTCAGATTGGCTGTCTTTTTT  
TCTGAGCCGATTAACCAGCTGGACGTTGCAGAAACATCATGTGATTCTGAACATCA  
ACAGCACACAACACAAAGAATGACCTTACTGTGTGCTTTTTGAAAAACAAGATTTAT  
ACACATGATGTCAAAGGCCACCCAAACATCGCAGAAGGCGCCGAACGGCCAAAAAC  
3GGCATAACTAATGTGGCCACGAGAAGATCTGCCACCGCCAAGCTGACAATGAGGT  
AGGCGTTGAAGAAGCGAAGAGGAATTATTATGCCATGCTCTATTCCCTGCTCATCCT  
ATCCTCATTATCATTTTGGGGAATGTCCTGGTATGCCTCAGTGTGCTGACCGAACGC  
GCTGGAGGACAACAACACTACGTTATCTACTCCTCCGTCTGTTTCGTTTTTCGTGCCGT  
GTACCCAGCAGAGCGGGACTGTAAAAGGGCAGAGTGCTGAAGTCGTGGCCAAGC  
GACACTGCGCAAAGAGTGAAGGTAATTATCACCCCTCACTTTTGCTGCCATGGAAAA  
3ACCCTAGGCTGTGAAATCCGAGACTCCTGCTGGCATTCTGCCGTGGCTCTGGAGC  
ACTAGCAACTGTTAAGTAAACACCCTGATTACCTTTGCAAAT  
AGCGTGTTTTCTTGCCACTAAAATGTTGCCTGAACAGTGTTACACAGACTAACAGG  
TTACAGGTCAGGCGTGTACCCTTAGACTTACTATGTTT  
TAGGGCCCTTCATCACATAACAGTGGAATCCTTGCCTAACCTTCAAGAGGTGAGCA  
3AGAGCAGCAAAGTAAAAACACACAGTGGTTAAACATGTCTAGCTGTGTAACATATC  
CCACTGTTATACAATGACTTGCCTAATTACCCTAACTTTACCCTAATTACCCTAGTG/  
3TGCCAGAAGCTCTTACCAAATCGCACTCTTTGAAGGCTCTTCCAAGATGAACG  
3TGATGAAGACTTGCCTA  
ACTGGGTGAGGAGCCACCAATGGGAGCACCACTTGACCCTGGCAGGAGATCGCC  
CCAGCTTCTGAACGAGAATGTGAAAGTGGGTCTGTTGTTTGCCTCTAAAGCAACAG  
3ACCGACAGCAGCTCCACCGTAAACCGCCTCGGTTTTTTATTATTCTCCGCCGGTCC  
3ACAGAGGACTGACATGTGTTTATGTAGGTAAATGTATTTGCATTTCCGATAGCACG/  
3CTTACCCTGGATCTGGAGTCTGGTTTTGGTAAGATCCAGGGGGAATGTGACTAA/  
TTCAATACACTCACAGAGAGAGACGTGTCTATATCTTTGTGTGTGTGTGTGTGTG  
3CTACGATGAACATTTCCCAAGT  
3CTCAAAGCCCCAAAGAAGGTGCGGGCACTGGGACGGACAGGGTCAATACCCCTG  
3ACCCTCAACGGGGGGCCATGTCAGCGGCTACCGGAGCCATCTCGGCGGTGGA  
3GAGTAA  
3ATGAAACTCTACTTTTGTAAAGTGTCTTCACTGGTGAGCGTAAAAAAAATGGACA  
3GAAAGATGAACCATAAGGACCTGCCACCCACAAGGGAGGACTTTAGAGGTGAGTA



CTCGGATCACGCTGAGACCGTGACCTTGCGAATACACCGCGGAAACATGACGGTG  
CAAAGGAAGGGTATTGCAGCGGGTAACTGACGGCCATGCAGCGATCCACAGAGAT  
TGTTTTTCATTAAGAAACAGACGAAACCGTATGAATTATTAACAAGTCTTGCTCTTC  
ACCGATGATCAGATCTGCACAGGCCAGGCTGAAAAGGAAGTAGTTGTTGACCGTC  
GTTTTCTTTTCAGGCTCTGGACGTCTCATGAAGAGCCAGCGGGGAATGTGGTCCAG  
CAGAAGTCCTATTTCCAAGTCGCCTGCTGTGGAGAACAACACTCAAAGAGTGCTTCAG  
TCGGTATAATAACCACACACTATAAATCATTTATTAACATGAGCAAATAGTGAATTC  
CTACAATCTCCGTGGCGGCTTTCCATGGCATCACCAAATGGCCACAAGCAAGTC  
AATTAGTGGTGGTCTGCAGCGCTTTCTCTCGGGAGACTGCCATACACACCAACAC/  
GGCTATCGTGTGGGAATGTTCTGGTTTGCATTGCTGTGCTTCGAGAGAGAGCTC  
CTCACTCAAACAGCAACCAACTACTTCATTGTGAGTCTGGCCGTGGCTGATCTCCT  
GCCCCATCATGCTGCTCCTGTAAGTGCAGGAAATGTTCCGGGGCCTGAGGAACTGGGA  
CTCTGTGTAGGGCGATGGGATGCAGATGGGGTATTCTCCACTGGCAGAGATGGA  
TGTTGGGCAGCTGCAATGCCGCTTACCTGTGTTATTGTTACACGTGGGCAAATCAC  
AGAGCATTGAGTTCATCCGGGACACTCTGGTCTCAGCCGAGGAGGAGGAAGGCAT

CCTTGATATCACCATAAAAATAAAGCTTGAAA

TCCACTCCAACCCCATTTACTGTGACTGTGTCATTCGCTGGATCAATATGAACAATA  
CTGCTTTCTGGAACCCCTCTGATGTGTTAATCTGAACTCACTATATCAGCTCAACAGT  
GAGCCTTTACATGTCACTTTAAGCTGAACACTAGTGTCTTGAAGAATATCTAGTCTA/  
GCACCAAGGGAGACTCTCGCTCAGACAGCGGACACCACCACCATCACCACCATCA

TGTGGGAGGTGCCAGGTAGGACAGAGCTGCTCAAACACTGTGCCAACTTTAGCAAGC  
TACAGCTAATCACTAACCCCTTCATAGGACCACTAACCAACAGGTACAGCCGCTAG  
GACCGTCAAGTCTCAAAGCTCCGAGCCTCGCCATATTCTCTCGCCTGCTCACAGATT/  
AGCCGGCAATCTATGCAAATGGATATATTGAGGGTCAAACGTTGCTT  
CAAAAACATTATTAATAAAAACAGAAAGTAGACAAAAAAAATATTCAAATACATTAGG  
TGTGTGTGTGTGTGTGTGTGTGTGTGTGTGTGTGTGTGTGTGTGTGTGTGTGTGTGT

GAACATTTAGGACTCTGGTGGTCCAACAGACGAGCCTTGATCCACCTAGGGAGACC  
GAAGAAGAGGGAGGGCTACCCCGAGCGAGAGACGTGGACCAGACAGATGGACTT

AGCTCAAATTTTTTATTGTTTACTTTGGCTTTACACCTGT  
ACGGTGTATGTTTGTAGACATTTTATCAGAACTAGTTTGATTAATAATTCTTAAAG

TCGAGGACGAGGCGTTACGCAACCGGACACACTTCGCACTGCGTCTGCTCAAGT  
TACGCAGAGGCTGAGGATGGATGCCGTGCAGCACAACACGTCAAGAGCGGTCCA  
CATCAGCCTCGGCCTG  
TGCAGGTGTCGATTAACCTTGATTGAGAGCATGACGAGGATGTTGCCACGACGGT  
GAACACCGAATGAACCAACATGGCATTGAATGCGTGCTAGGTGAACGATGGTGC  
AATTACTTGGCGAGAAATGGCTGACAGAGGGTTTCGAGAGAGACAACCTCATCAAAG  
ATTATTTATTAAGCATTAACTCTACATTAGTAGGTGTTAGTAAGCAGTTTATAACTA  
AGAAATAGCCAGTGATATAACAAAGAAGTTGGTGACTTTAGAGCGCAGATGGCGAA  
ATTGCCAAAGACAATGACAAAGATGAGGAGAGTCAGGAGCATGGCATAGTAGTTAT  
CTTCAGACCACCACCAACTACCTGGTGGTCAGTCTGGCAGTGGCTGATCTGTTGGT  
TGCTGGCCATTCTCGTTCTGCCGCTTTATGTCTACTCTGAGGTGAGGACCAGAGATT  
AGAGGCTCGGAAAGCTAAATTAAGGAGCAACATGGAGGCCTGCCGAAAGCTTCAG  
GAGGATGAGTTGAAGATGGGGGAGAGGATGTGACCTCCCACACGGCCTGAGTCC  
AACTGCCATTCAGAGTATCTGCAGTCAGCTGGTGAAACATGATGTTCTCAGATGTT  
GGCTAAATGTTCCACCGAAGGCGGAGGGACTCCCATGAAAGGGAAGAAGCCTATT

CCAGGGTCCGCTTCATGGAACCTGGATGCCCTTTTATGCGCAGGGCCTTCAGAGTT  
AACCTGAGTTCTCTTCTCTGCAGAGGGGCTTCAGGTTCCGCTATGGGTGTGAGG  
ATTATGTGCTGTCATCATGGAGAAGAGGAAACACATCAGCTATTAGAGATGAGTT  
TCACGGCCATGACCATGGGAGCCACAAACACAGCAAACGAAGTAAGAGCAAGGAA

CACACGCACACCTGCATGAAACACTGCACAAATTTCAATATCATTTAGCAATACACC  
TTTAA

AACTCCATCATGGAGATGCTGGGGAAAGAAAGAGCGGAGAAGCAGAGATGTGAAG

CAGATATCAATGAATACAAATGTATAGATATTATTTGCTTAAAGATACATTTATTTAA  
GAGAGAGCAGATCCTGTTTATCCAGGGTGTCTGCAAATACAGGACAATGAAACACC

TGGAGCAAAAAGATGGACTTCCTGTTGTCTGGTCATCGGGTATGCAGTGGACCTGG  
CATCATGTCCTGCGTGGGTTTTGCAGTGGGGCTGGGGAACGTCTGGCGCTTCCCG

TTTTTTACTGGAAATCCTCACGTATTAATAAACACGCATTTAAACATATACCTTTCTA

TCCTCAAGGGAAAAGAAGGCCGCCAAGACTTTGGGTATCGTGGTGGGATGCTTCGT/  
GGCGTTACATAAATGACGACCGAACACCCAGCGACCCAAGGCTTCAGATACAGCAC

CGACGAAACTGAGAGATCCAGTGACCAGTGCGATGAAGACCATCTCCACCGTCTTG  
ACGTTGAGCACAAAAACGGTAATGACAATGGA  
CTCTTCAAATAAACACCATTTGCATGATGAGGAGGACAATTTACCAGTGCAATCACG'  
AATCTACAAATGCTGTATTCTTGACTTATAAGCTCATGTGGTTTTATACTTTGTTAATC  
ACTTTGTGACTGCAGCACAGACCAACGTGTTTCCCAGTAAGGTGGTCAGAATGAGC  
ACTGATGCTTGGCCTCACAGTCTGTGCAGTTGAGAGCCCCGGTCCCATTGTCATAA  
CGCCTCACTGGTCATGCCTTGGGCAGTTTATTTGGAAGTAAGTACACTAGGAACTA  
TGATGATGGAAGTAGGTGGTTTACAATCTCTGTTTACTCTAAGCATGTGATGGTAT  
GAGGCCGCAGCGTCGCTCCAGCCGCTGTCTGGCCTGCCGCCGCCGCTCCCGCCT  
ACTTCCCTGCAGCTGAAGAAGAGGACTGTCTCCTTCGGGATACTCGGACATGGTGAA  
GGAGAGCTGTCATTCATCACTGAAGAGCGAAAGCGTGTGTTTGCTGCATTTGCTCG  
GTGGGTCTGATCGGGCCTGGATCCAGCTCTGTGGCCATCC

TGAAGGTCGTCTTGTCAAGCAGGTGCATTCACGAGAAATGG  
GCCCGTCTCACGGAGGGCTTCCAGGGGCCTCCAGCGAGAAGAACCGCAAGTCCT/  
ATTAAAATTAACAGAAATTGGGGAAAAACATAAAAGAATTAAGATTTAATTACTG/  
CGCAAGTCAGACTCCAAGCAACGCTCAGGGATAGCAGGCTGGTGGAGCTCTGACC

CAATTGACTTTTGACACCCTTAGCCACACATCTGGTTAAACTGCCTTTCCATA

GGTTTGCTGAAGAGGAACTGGATTCTCATTGCAACCATCATTGCGGTCATTCTGGG

TTATACATATACATATTTTTTAACTACAAAGGTTAAGTAGCTATATGTTTCTGTAAAT  
ACAG

CGCAATGTGTGGCGCTTTCCCTACATCTGCTACCAAATGGAGGGGGTAAGGTCAA  
TACCTGTGCTACAAAACGGTGGAGGTAAGAACTGCCGGTGTCTCTCTGCAGCGC

AAATATAATTTGCCACAGCCATATCACCTGCAGCCCAAGACCGGTTACTCACTGAA

ACTCTGTTGGCTTCCGTTTTTCCTGGTTCTTCCGATCGGTGAGTTGTTAGAACTTTT  
GAGAATGGAAGAACCACAGAGCTCAGAAGCAGGTCTGCGATTGCCAGATTTCCAAT

TACGGGCTCTCGCCGTCGCCCTCAACCGCTGCACATGAGCCATTGGCGCTGCCAC

TGATGTTTTCAATTCCAGTTTCAGTTTCATTCAACAGTCGCTAGACACTAGCGATTT/  
GATTCATTTTTTCATTAAGTGTTAACGATTCATGACCAACTAACTTCTCTC  
GAGTGAGAGGAAACAACCAGTCAAACTCGCTTTGATGAATCGCGCTGCGACACAC  
TAAGTGTCATTGTAGGGATACTCCGTGAGGAAATCCATGAGCTGTGGCCAGGGAA  
CTGTAGTTTACCATGTTTAAGGAAAAACAATAAATTTTCCCATTTCGAAAATCTGAT  
ACTTTTTCCAATTGCTGAATCTTATTTGATGATATAGTCACTGCACTTTTATAAATTA  
GTTATAGAGAAAGACATTACATTGGAGGAGCTGGACCAAGATCACTATCCCGATCC  
GGCGGATGAGTTCAGAGCTGTTCGCATCAGTAACGGGGGACTGTTGATGTGTGTCA  
ACACCCTGCTGTACAGTGAGG

ACCACAAGTGCAGGTAAAGTTTTTAATTATATATTTGTATTTAACATTTATAAGATTT  
AATAACATGTAATATTCATGTTTAGGTATTGTCTCTGCAATAGTTTCCAGTGGAGCT  
ACAACCTGGACAGTGACAGCACCTACCGGACTCCCAGCATCATGAGTCGGCACC/

TAAGAGACACCGTTCATTTATTGAGCATGTTTCTCAATGCATATTTGTTGCTATCATI  
GAAATGAATGAATGTAAATGCATCTACCCAATTCTGCCACAGCTGCAGCACAGGCT

AT  
GTTTCATGTTTCAGATCTTTTCGGATGACACGCCGTCTGTCACTCCCCCTCCCCCTCTC

AGCTAAGCAGGGCTGAGCCTGGTCAGTACCTGGATGGGAGACCAATAGGGAACAC

TATATTTATTATAGTCAATACCTGTCAATGTTGGGA  
AAAATAATGAGTCACGGATCGAAGG

GTGTCACAGCTGAAGTTGGCATCACTGGACACGTTGCTCAAAGAGCCTGAAACACA

ATTAGATGTAAACACATGCTATTCACCCAGAAGTGAACACAAACAATCTGAATCAGC  
GACCACATTTCTAGAAGTGGATCTTGCA  
GTGCTGTCCAGGACTGTGGAGTAATTCACATCCATGGCTTTTCACCGAGTCGAGTTA  
GAAGCCTGAAACTGAGAGACATAATTCAGTCAATGCAACAAACAAGGAT  
TGCATGGAAATATAAAAATGACAAACAAGTTTATATTTGAATTTGATCTATGTAAAAT  
GAAAAAGAGGTTGAAAAGATGGATTCATGGCAGC  
TCGACAGTCCTGATCCTGTGTCCATGTTGG  
TTGGTGAACCTC

TGTCGACGTTTATGTTTTCACTATTTCTCTTCATTTTTTTTTGTTTTATTACAATTTTAT  
TATTGTGTGTGTGTGTGTGTGTGTCTCAGAGGGCTGCAGTGTGGACCAGTCGT  
ACGGAGATCATATCACTCACT

TGTTGAGCTCTAATACGTCTCGTCGTTAATTATGTATCGTTTTATTATTGCTTCACTG  
GATAAAGTGAACCT

GAGTGACGTCACAGACACGGTGGAGAAC

TAGGTTGCTGTTGGAAGTGGTGTAGTGAGGCCAGCAG

AGCACACACCGTGATATAAATTACACAGCAGCAGATATGTCTGGATGCAGTCATTG,  
GTCAGGGCACCAGCTGAAGTCTAAAACCTTCAAATTCAGGCTTTCTTAAACCTCCATC  
(GCAGTCACCCCATAATTCCAGACCAAATAAGAGTGCTTACACATGAATCGGAGCA/  
GAAGGAAGCAGTAACACGCCAAGGCAAAAAGGAACGATATTGATCAGAAGCTTCCC  
GTTATAAATGCAACATATTTCAAATATGGCTAAATGTACGCTTAATTTAATTTCAGA)

TTAATATTTTTCACTAACATGTTAATTTGTGTGTATAATTATTGACCTGTGATCTTCA/  
'GTGTGGACGGAGATGCTGACGCTGCAGCTGTCAATCAACCGGCCAACAGCCCAG/

TCTGTGGTGCTGCATGATGGCTTTACACCGCAAACAGTCGCTGGTTTGACTATAAG



AAAATAATCACAAGCTGATACGAATATAGCTGATACAAATATAGTGAGTGTATAGAA  
GTGATTTAATGAATCACTTGAGCCAATCAGAAACCAGCATTGTTCAAATGAACCAAT  
TACTGGTTGATCTGGTTTGTCCGTAGTTATGCTG  
TCATCATATCTTGAGTTGTCATT  
CCATTTGACCTATGTTGCAA

TGCTGCTGACTAATCTAATGTACATGCTAGGGATGCACTGATATGG  
TCTGCTGCTGAAGCTCCTGCACCTGTCAAGCCACGCACACCCCTCTAGAATCCAC

AGTAGGCTAATTAAGTATTGCACATTTAATGCACGTATCTGCAGGTGTGTTGATGC

GGAAACAGCATGACATTCATTATGA

TAGAAACCAGAACTGTCCCGGTAAGCCAATCAAATCAAGC

CAATGAAACGCCAGAGCTGTGACATCATCTCAGGAGGAGCCGCCACCAACCACA

GTGTATGTGATGAATGAAGGCATTGATCTGTATGTGTGTGTGTCCGTCTGTATATG

CGACTCGCCACCCACTTTTGTAAACCAACTTTGTAAAGGCGCTAGATA

GTGTGTGTGTCCAGATATTTTACTACTGCCACAGAGAAACGTGACCAGACTCCCA

GTATGACACTGTAAAATCCC

# adra1aa

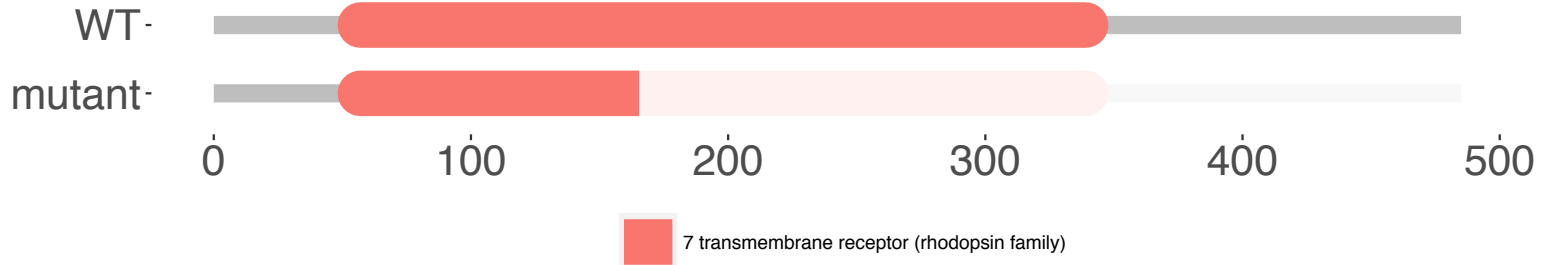

|                |                                                               |      |
|----------------|---------------------------------------------------------------|------|
| NM_001324454.1 | gagcgacgtgcattgcttgcgctcatagctttatgggtactgtccatcactatttccatc  | 1560 |
| NV1180         | gagcgacgtgcattgcttgcgctcatagctttatgggtactgtccatcactatttccatc  | 1560 |
|                | *****                                                         |      |
| NM_001324454.1 | ggacctctattcggctggaaggaaccggcaccggatgatgaatccatatgcaagataact  | 1620 |
| NV1180         | ggacctc-----                                                  | 1567 |
|                | *****                                                         |      |
| NM_001324454.1 | gaggaacccggttatgccatthttctcagctttgggatctttttacctccctctagtggtg | 1680 |
| NV1180         | -----                                                         | 1567 |
| NM_001324454.1 | atcctctcaatgtattgtcgtgtgtatggtgtggcgaggagggaaacgcgaggactgatc  | 1740 |
| NV1180         | -----                                                         | 1567 |
| NM_001324454.1 | agcggacagaagactgagaagtcggatcacgctgagaccgtgaccttgcaatacaccgc   | 1800 |
| NV1180         | agcggacagaagactgagaagtcggatcacgctgagaccgtgaccttgcaatacaccgc   | 1627 |
|                | *****                                                         |      |
| NM_001324454.1 | VLCCTASIMSLCVISVDRYIGVSYPLQYPSIVTERRALLALIALWVLSITISIGPLFGWK  | 180  |
| NV1180         | VLCCTASIMSLCVISVDRYIGVSYPLQYPSIVTERRALLALIALWVLSITISIGPQRTED  | 180  |
|                | *****                                                         |      |

# adra1ab

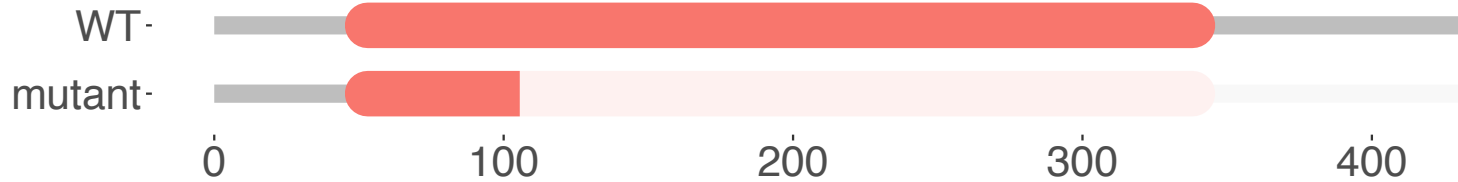

 7 transmembrane receptor (rhodopsin family)

|             |                                                                |         |
|-------------|----------------------------------------------------------------|---------|
| XM_680297.7 | ctgctgtatctgaagccttgggtcgctgggtggttcggtcgtcatttatgtaacgcctgga  | 600     |
| NV1175      | ctgctgtatctgaagccttgggtcgctgggtggttcggtcgtcatttatgtaacgcctgga  | 600     |
|             | *****                                                          |         |
| XM_680297.7 | ccgctcttgacgtgttgtgctgcacggcgtccatcctcagcctctgtgtgatctctgtgg   | 660     |
| NV1175      | ATTTATGTAACccatcctca-----gcctcgtgatctctgtgg                    | 638     |
|             | * * * *                                                        | * ***** |
| XM_680297.7 | atcgctgcatggccgtcagttaccgctccaatacccttccttctgctacgggtcgaagg    | 720     |
| NV1175      | atcgctgcatggccg-----                                           | 653     |
|             | *****                                                          |         |
| XM_680297.7 | caatgactgcgggtggcagctctctgggccctttcagctgctatctctgtcgggccaactat | 780     |
| NV1175      | -----tcagtta                                                   | 660     |
|             |                                                                | * * *   |
| XM_680297.7 | ttggatggaggaacccatgccagaagacgagtcgggtgtgcagagttaacgaagatccag   | 840     |
| NV1175      | cccgctggaggaacccatgccagaagacgagtcgggtgtgcagagttaacgaagatccag   | 720     |
|             | * *****                                                        |         |
| XM_680297.7 | VACHRNLRSVTHYFIGNLAIADLLLSSVVLPFSAVSEALGRWVFGRHLCNAWTALDVLCC   | 120     |
| NV1175      | VACHRNLRSVTHYFIGNLAIADLLLSSVVLPFSAVSEALGRWVFGRHLCNAWNLCNPSSA   | 120     |
|             | *****                                                          |         |



# chd8

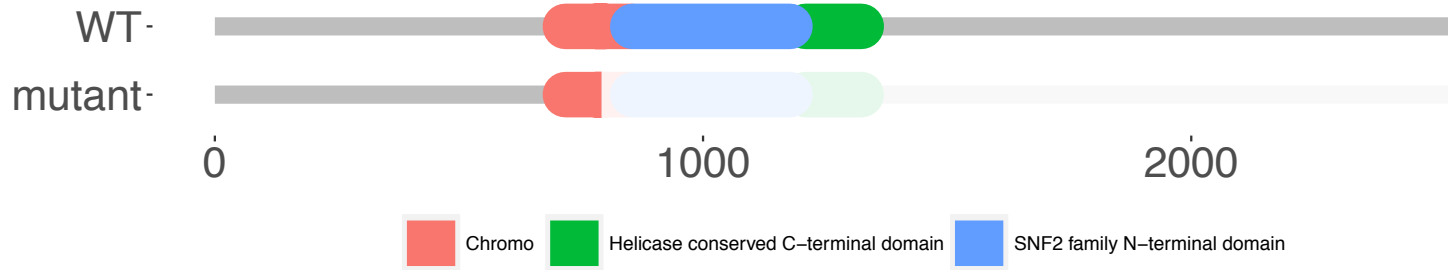

|                |                                                              |      |
|----------------|--------------------------------------------------------------|------|
| XM_005171312.3 | tgttgatgaaggcaaagtgaagaattcaggaagattgaaagccgccaaccacgactcaa  | 2940 |
| NV970          | tgttgatgaaggcaa----gaagaattcaggaagattgaaagccgccaaccacgactcaa | 2936 |

|                |                                                              |     |
|----------------|--------------------------------------------------------------|-----|
| XM_005171312.3 | EDVDEGKVEEFRKIESRQPR--LKRTPRPAASAWKKLDESTHEYKNGNQLREYQLEGVNW | 897 |
| NV970          | EDVDEGKKN SGRLKAANHDSRELLG LLQVPGKS-----                     | 873 |
|                | ***** :. * :.: * *. *                                        |     |

# chr4a

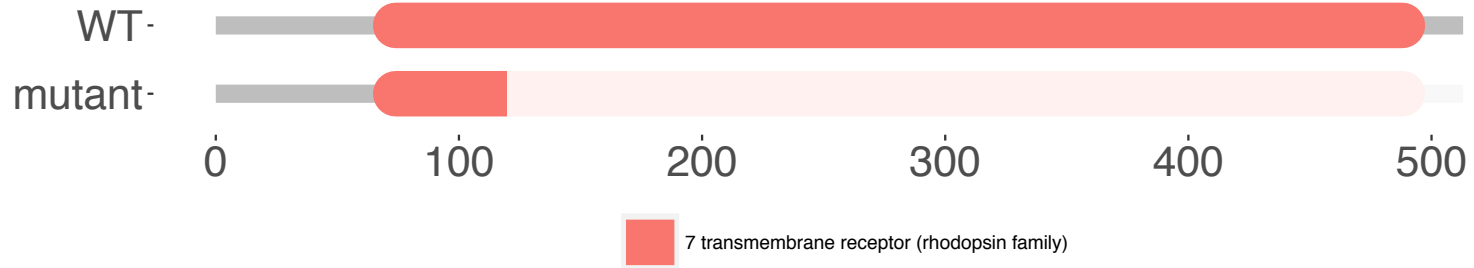

|                |                                                               |     |
|----------------|---------------------------------------------------------------|-----|
| XM_001922407.4 | accgtctacatcattaagggttactggccgcttggcccagtgggtgtgtgacctgtggctc | 960 |
| nv1152         | accgtctacatcattaagggttactggccgcttggcccagtgggtgtg-----tggctc   | 953 |

|                |                                                                |     |
|----------------|----------------------------------------------------------------|-----|
| XM_001922407.4 | GYWPLGPVVC DL-WLALDYVVSNASVMNLLIISFDRYFCVTKPLSYPTRRRTTKMAGLMIA | 179 |
| nv1152         | GYWPLGPVVC GSRWITWSATLQS*-----                                 | 143 |
|                | *****. *:: . .:..                                              |     |

# chrna2a

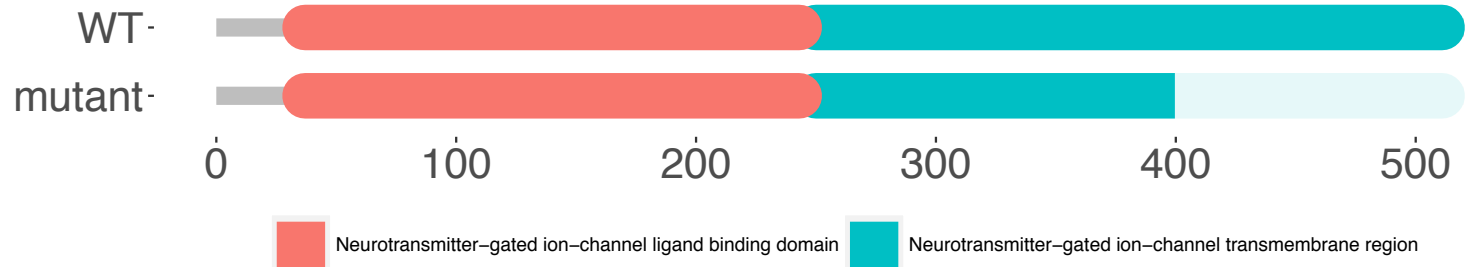

|                |                                                               |       |
|----------------|---------------------------------------------------------------|-------|
| NM_001040327.1 | gggattggtttatccacatccatctcctctccatccgcaacctctctgcatttgctctgac | 1320  |
| NV1187         | gggattggtttatccacatccatctcctctccatccgcaacc-----tttgtctgac     | 1312  |
|                | *****                                                         | ***** |

|                |                                                               |     |
|----------------|---------------------------------------------------------------|-----|
| NM_001040327.1 | PEPEKKPKKTANLSTSKSWFQQETGVDGLVCQDMEFGIGLSTSISSPSATSLHLS DSEPL | 420 |
| NV1187         | PEPEKKPKKTANLSTSKSWFQQETGVDGLVCQDMEFGIGLSTSISSPSATFV*-----    | 412 |
|                | ***** :                                                       |     |

# disc1

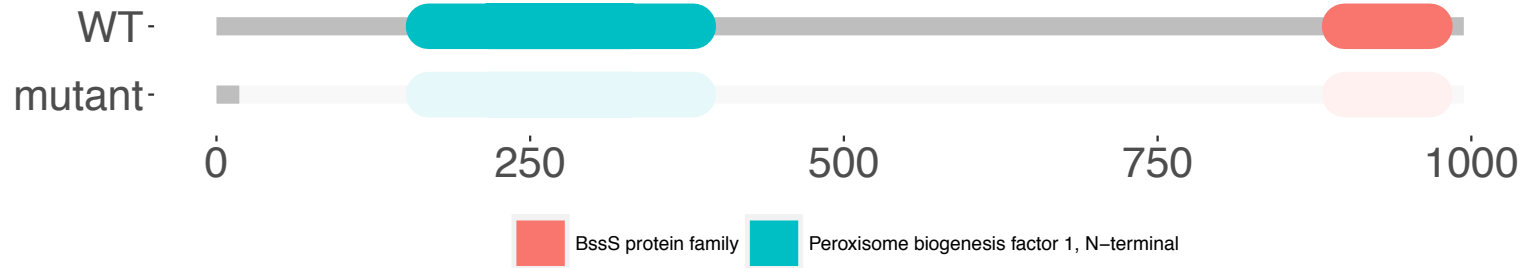

|                |                                                              |     |
|----------------|--------------------------------------------------------------|-----|
| NM_001142263.1 | tgtgaatccttcgggaaaccaccgcaggaggagcttcagacggcccggatacatgcggtc | 240 |
| NV1142         | tgtgaatccttcgggaaacc-----aggaggagcttcagacggcccggatacatgcggtc | 235 |

|                |                                                              |    |
|----------------|--------------------------------------------------------------|----|
| NM_001142263.1 | MMFAGMVRVENTSKTLKTDIDSPCHRCAVRTGGVNPSGNHRRRSFRRPGYMRSEPINQLD | 60 |
| NV1142         | MMFAGMVRVENTSKTLKTDIDSPCHRCAVRTGGVNPSGNQEELQTARIHAV*-----    | 51 |
|                | *****:.. . * :                                               |    |

# dlg4a

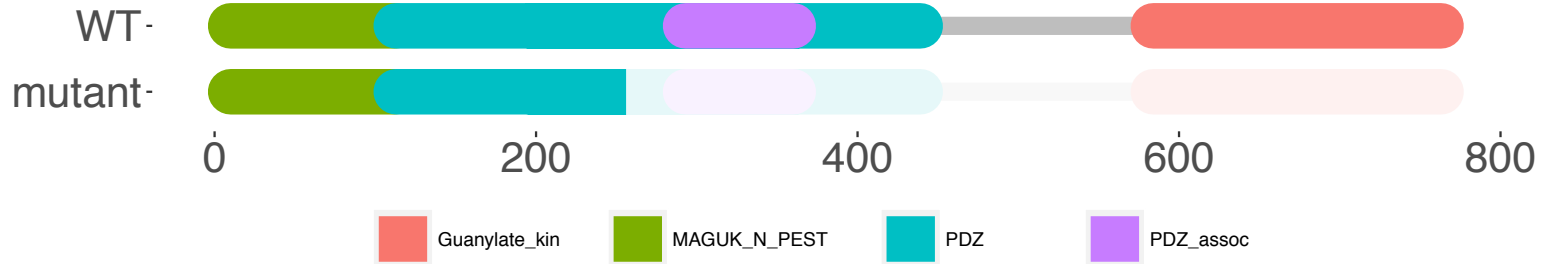

|                |                                                              |      |
|----------------|--------------------------------------------------------------|------|
| XM_009302021.2 | cggtgaataatgtgtgtttggaggatgtgatgcatgaggatgcggtgggagcgctgaaaa | 1620 |
| NV1149         | cggtgaataatgtgtgtttggaggatgtgatg-----cggtgggagcgctgaaaa      | 1610 |

|                |                                                              |     |
|----------------|--------------------------------------------------------------|-----|
| XM_009302021.2 | KIIEGGAHKDGRQLQIGDKILAVNNVCLEDVMHEDAVGALKNTAEVVYLRVAKPNNLYLT | 300 |
| NV1149         | KIIEGGAHKDGRQLQIGDKILAVNNVCLEDVMRWER*-----                   | 276 |
|                | *****: :                                                     |     |

# drd1b

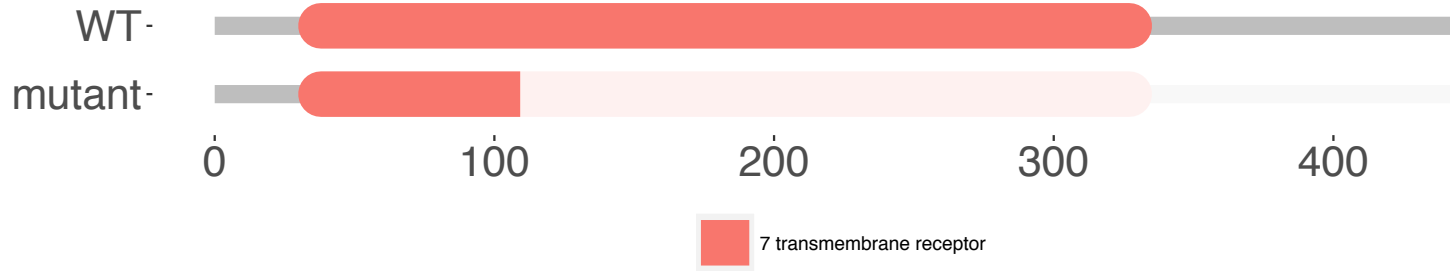

|                |                                                              |     |
|----------------|--------------------------------------------------------------|-----|
| NM_001135976.2 | tcagtgtggaccgctactgggccatttcaagcccgtttcgctatgagcgaagatgacac  | 660 |
| NV1145         | tcagtgtggaccgc---gggccatttcaagcccgtttcgctatgagcgaagatgacac   | 656 |
|                |                                                              |     |
| NM_001135976.2 | VISLAISDLLVAILVMPWKAATEIVGFWPFGAFCDVWVAFDIMCSTASILNLCVISVDRY | 120 |
| NV1145         | VISLAISDLLVAILVMPWKAATEIVGFWPFGAFCDVWVAFDIMCSTASILNLCVISVDRG | 120 |
|                | *****                                                        |     |
| NM_001135976.2 | WAISSPFRYERKMTPKVAFIMISVAWTLNILISFIPVQLNWHKAQTTSYTELNGTYGELP | 180 |
| NV1145         | -----PFQARFAMSER*-----                                       | 131 |
|                | ** : . * : :                                                 |     |



# drd2b

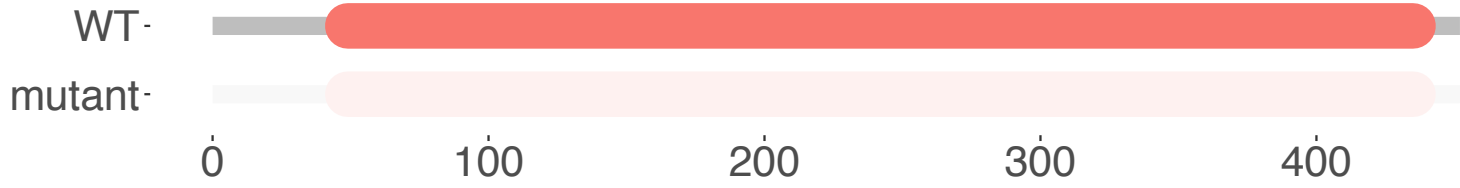

|                |                                                              |     |
|----------------|--------------------------------------------------------------|-----|
| XM_009301838.2 | tgacaatgggaccggggctctcaactgcacagactgtgaggccaagcat-----       | 409 |
| NV1147         | tgacaatgggaccggggctctcaactgcacagactgtgaggccaagcaTAGTTAGCAAGt | 420 |
| XM_009301838.2 | cagtataactactatgccatgctcctgactctcctcatctttgtcattgtctttggcaat | 469 |
| NV1147         | cagtataactactatgccatgctcctgactctcctcatctttgtcattgtctttggcaat | 480 |
| XM_009301838.2 | MDFLTEYPYNDTYDNGTGALNCTDCEAKHQYNYAMLLTLLIFVIVFGNVLVCMASRE    | 60  |
| NV1147         | MDSFTLLEEKMLSIIKKLWI*                                        | 20  |
|                | **                                                           |     |

# drd3

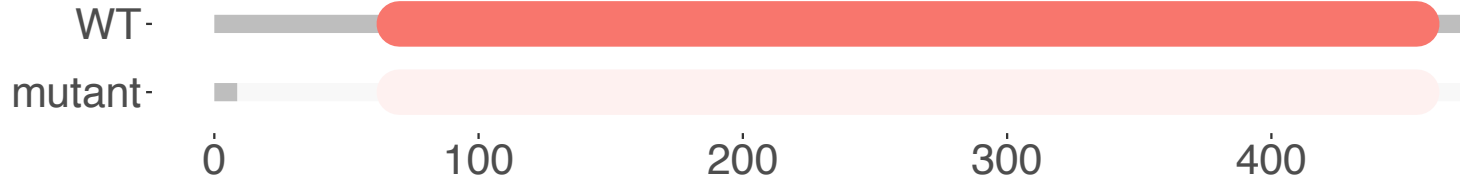

■ 7 transmembrane receptor (rhodopsin family)

```

drd3-001 AAGTGC GTTCAGATGGGGT TCTGTTTCG GTTCTTCGCTGGAGAAGCTTAACAGATCTTCC 300
NV1227   AAGTGC GTTCAGATGGGGT TCTGTTTCG GTTCTTCGCTGGAGAAGCTTAACAGATCTTCC 300
*****

drd3-001 ACACTTATGGCAATGTTTAGCAGTGGTGAATGGCTCTGGAATGACTCTGAGCATTTCATTC 360
NV1227   ACAC----- 304
****

drd3-001 ACCCCTGGGGGAAACTACAGCCCAGCGTCAGGCGTTGAAGAAGCGAAGAGGAATTATTAT 420
NV1227   -----TGGGGGAAACTACAGCCCAGCGTCAGGCGTTGAAGAAGCGAAGAGGAATTATTAT 359
*****

drd3-001 GCCATGCTCTATTCCCTGCTCATCCTGGCTATCGTGTTTGGGAATGTTCTGGTTTGCATT 480
NV1227   GCCATGCTCTATTCCCTGCTCATCCTGGCTATCGTGTTTGGGAATGTTCTGGTTTGCATT 419
*****

drd3-001 GCTGTGCTTCGAGAGAGAGACTCTTCAGACCACCACCAACTACCTGGTGGTCAGTCTGGCA 540
NV1227   GCTGTGCTTCGAGAGAGAGACTCTTCAGACCACCACCAACTCAG-----TCTGGCA 469
*****

drd3-001 GTGGCTGATCTGTTGGTGCCTCACTGGTCATGCCTTGGGCAGTTTATTTGGAAGTGGTC 600
NV1227   GTGGCTGATCTGTTGGTGCCT-----TCACATGCCTTGGGCAGTTTATTTGGAAGTGGTC 524
*****

```

```

ENSDART00000130568      MGFCFGSSLEKLNRSSTLMAMFSSGEWLWNDSEHSFTPGGNYSPASGVEEAKRNYAMLY      60
NV1227                  MGFCFGSSLEKLNRSSTLGETTAQRQALKKRR-----GIIMPCSI PCSSWLSCLGMF-      52
*****                  :. : * :                * *.* .: . .*:

```

# drd4-rs

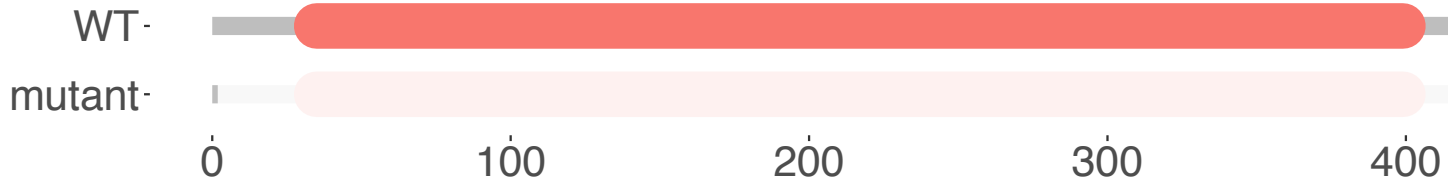

 7 transmembrane receptor (rhodopsin family)

|                |                                                               |     |
|----------------|---------------------------------------------------------------|-----|
| NM_001012620.2 | agtatagaccaacggcggccacgaggggtacaactacctggctttgatatgtggcgtg    | 480 |
| NV1217         | agtatagacc-----                                               | 431 |
|                | *****                                                         |     |
| NM_001012620.2 | cctctcatcctcattatcattttggggaatgtcctgggatgcctcagtgtgctgaccgaa  | 540 |
| NV1217         | -----                                                         | 431 |
| NM_001012620.2 | cgctcactcaaacagcaaccaactacttcattgtcagtcctggccgtggctgatctcctg  | 600 |
| NV1217         | -----aaacagcaaccaactacttcattgtcagtcctggccgtggctgatctcctg      | 482 |
|                | *****                                                         |     |
| NM_001012620.2 | MVNVTPSIDPTAAHEGYNYLALICGVPLILIIILGNVLVCLSVLTERS LKTATNYFIVSL | 60  |
| NV1217         | MVNVTPSIDPKQPTTS-----                                         | 17  |
|                | *****.                                                        |     |

# drd4a

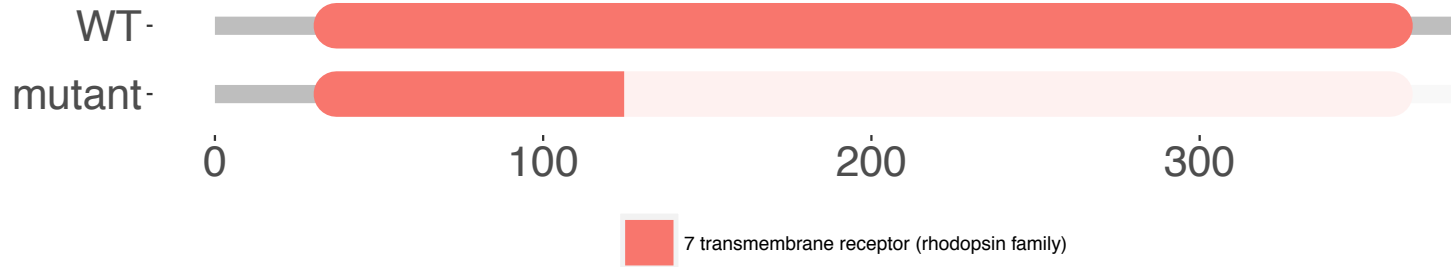

|                |                                                                      |     |
|----------------|----------------------------------------------------------------------|-----|
| NM_001012616.3 | acaaccgcaaacacgtggaccagcgacagattgtcctgctctccgccacgtggatcctgg         | 660 |
| NV1218         | acaaccgcaa-----<br>*****                                             | 610 |
| NM_001012616.3 | ccttagccgtggcctccccgtgatgttcggcatcaacaacgtccccaaccgggaccaca          | 720 |
| NV1218         | -----<br>-----                                                       | 610 |
| NM_001012616.3 | gcgaatgcaagctggaggacaacaactacgttatctactcctccgtctgttcgtttttcg         | 780 |
| NV1218         | -----<br>-----                                                       | 610 |
| NM_001012616.3 | tgccgtgccccatcatgctgctcctgtactgcggaatgttccggggcctgaggaactggg         | 840 |
| NV1218         | -----<br>-----                                                       | 610 |
| NM_001012616.3 | aagaggctcggaagctaaattaaggagcaacatggaggcctgccgaaagcttcaggagg          | 900 |
| NV1218         | --gaggctcggaagctaaattaaggagcaacatggaggcctgccgaaagcttcaggagg<br>***** | 668 |
| NM_001012616.3 | IAVSIPLNYNRKHVDQRQIVLLSATWILALAVASPVMFGINNVPNRDHSECKLEDNNYVI         | 180 |
| NV1218         | IAVSIPLNYNRKRLGKLN*-----<br>*****:.:.:                               | 138 |

# esr2a

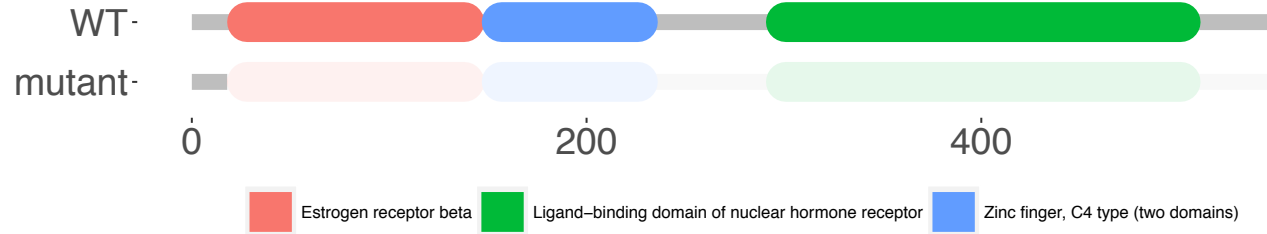

```

NM_180966.2      caggaagtggactcaggccgtgtgggaggtcacatcctctcccc-atcttcaactcatc      239
NV1182           caggaagtggactcaggccgtgtgggaggtcacatcctctcccccaTtcttcaactcatc      240
*****

```

```

NM_180966.2      MSEYPEGDSPLLQLQEVDSEGRVGGHILSPIFNSSP----SLPVENHPICIPSPYTDLGH      56
NV1182           MSEYPEGDSPLLQLQEVDSEGRVGGHILSPILQLILSISASGESPHLHPIALHRPWRLQH      60
*****::: . . ***.: *: * *

```

# gnrhr4

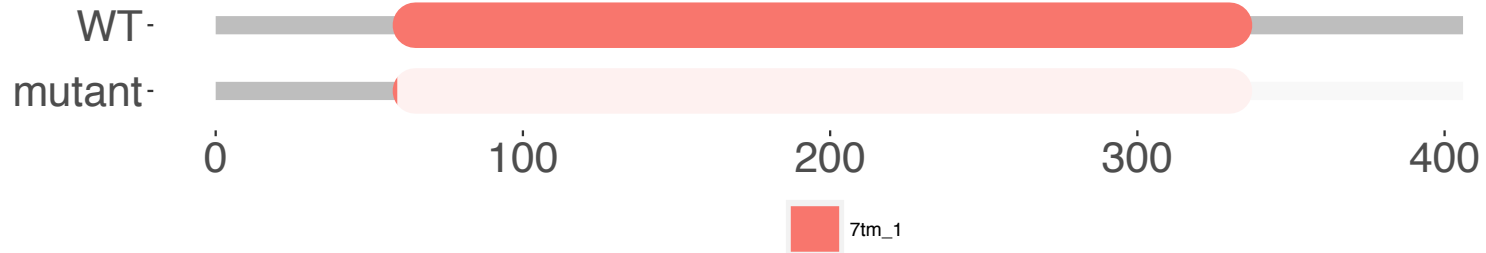

|                |                                                                |     |
|----------------|----------------------------------------------------------------|-----|
| NM_001098193.1 | agcaaaagtgaggggtgataattaccttcactctttgcgcgagtgtcagctgtgtgcaacct | 240 |
| NV1280         | agcaaaagtgaggggtgataattaccttcactctttgcgcgagtgtcagctgtgtgcaacct | 240 |
|                | *****                                                          |     |
| NM_001098193.1 | cgggc--tgttgtgggctgccagcaccaacaacaagcgcaagtcccatgtacgaatttta   | 298 |
| NV1280         | cggcAACGgttgtgggctgccagcaccaacaacaagcgcaagtcccatgtacgaatttta   | 300 |
|                | ****                                                           |     |
|                | *****                                                          |     |
| NM_001098193.1 | VSAVCNLGVLWAASTNNKRKSHVRILIMNLTVADLLVTFIVMPVDAAWNITVQWLAGDLA   | 120 |
| NV1280         | VSAVCNLGNGCGLPAPTTASAPMYEF*-----                               | 86  |
|                | ***** . : .. * : :                                             |     |

# grm5a

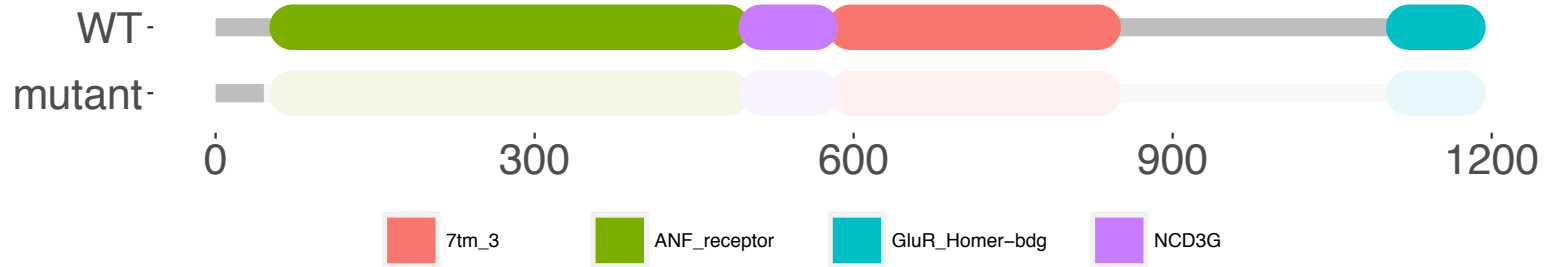

```

XM_009305305.2    caaggtccacgagcgcgaagtgtggcgccgtccgagagcagtatggcatccagcgggtgga    360
NV1162            caaggtccacgagcgcgaagtgtggcgccgtccgagagcagtatg-----ga        346
  
```

```

XM_009305305.2    KCGAVREQYGIQRVEAMMHTLDRINADPLILPNITLGCEIRDSCWHSVAVALEQSIEFIRD    120
NV1162            KCGAVREQYGGHDAHPGPHQRRPAHPS-QHHPRL*-----                    93
*****          : .. *           : . *.:
  
```

# homer1b

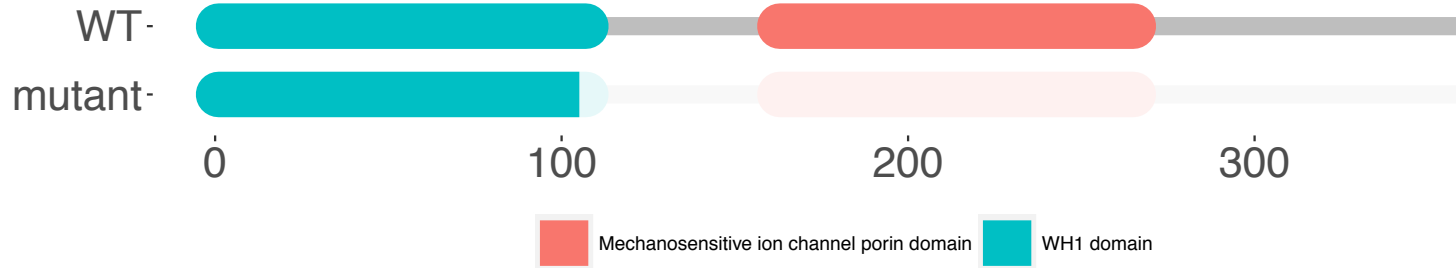

|                |                                                                                                                         |     |
|----------------|-------------------------------------------------------------------------------------------------------------------------|-----|
| NM_001326290.1 | t t t g c a g a g t a c a a g a a g c a g c c a g a a t a g c c a a g g a g a a g t c t c t a g a a a g a t g g a g     | 720 |
| NV1165         | t t t g c a g a g t a c a a g a a g c a g c c a g a a t a c - c a a g g a g a a g t c t c t a g a a a g a t g g a g     | 719 |
|                | *****                                                                                                                   |     |
| NM_001326290.1 | I T P N M S F T K T S Q K F G Q W A D S R A N T V Y G L G F S S E H H L A K F A D K F A E Y K E A A R I A K E K S L E K | 120 |
| NV1165         | I T P N M S F T K T S Q K F G Q W A D S R A N T V Y G L G F S S E H H L A K F A D K F A E Y K E A A R I P R R S L * - - | 117 |
|                | ***** : . .                                                                                                             |     |



# immp2l

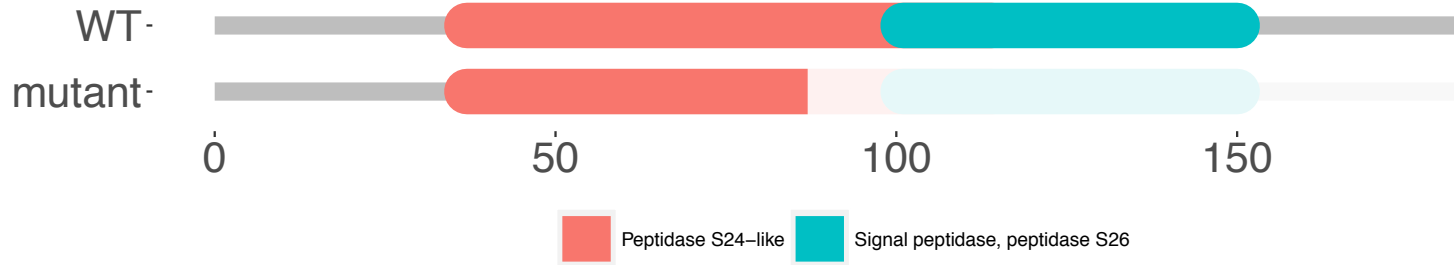

```
NM_001003755.2    gatcatcaaacgggtcatcgggatcgaaggggacttcattaaaacgctgggatataaaaa    360
NV1092            gatcatcaa-----tcgggatcgaaggggacttcattaaaacgctgggatataaaaa    353
```

```
NM_001003755.2    NRWSVRNYHVQRGDIVSVLSPKNPQQKIIKRVIGIEGDFIKTLGYKNRYVRVPDGLWIE    120
NV1092            NRWSVRNYHVQRGDIVSVLSPKNPQQKIIKSG--SKGTSLKRWDIKTVM*-----    107
*****                               :*  :*  . *.
```

# kctd13

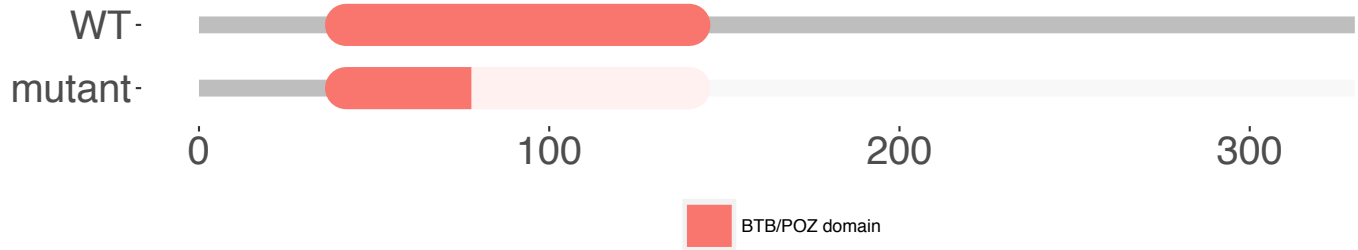

|                |                                                                 |       |
|----------------|-----------------------------------------------------------------|-------|
| NM_001077151.1 | agcatcgactctgaaggctgggtggtggttgaccgatgcgggagacacttttccctggtg    | 480   |
| NV966          | agcatcgactctgaaggctgggtggtggtt-----gcgggagacacttttccctggtg      | 472   |
|                | *****                                                           | ***** |
| NM_001077151.1 | MSAEASGSSGGHAVTVSGSSPSSSSHVGD EKPGRSLVSSKYVKLNVGGTLHYTTVQTL SK  | 60    |
| NV966          | MSAEASGSSGGHAVTVSGSSPSSSSHVGD EKPGRSLVSSKYVKLNVGGTLHYTTVQTL SK  | 60    |
|                | *****                                                           |       |
| NM_001077151.1 | EDSLLRSICDGSTEVSIDSEGWVVLDR CGRHFSLVLNFLRDGTVPLPDSTRELEEV LKEA  | 120   |
| NV966          | EDSLLRSICDGSTEVSIDSEGWVVLRE TLFPG-----VELPAGRD-----S            | 101   |
|                | ***** . * * *                                                   | :     |
| NM_001077151.1 | QYYRLQGLVQHCLSTLQKRRDVC RGCHIPMITSAKEEQRM IATCRKPVVKLQNNRGN NKY | 180   |
| NV966          | SFAR*-----                                                      | 105   |
|                | .: *                                                            |       |

# Irrn3

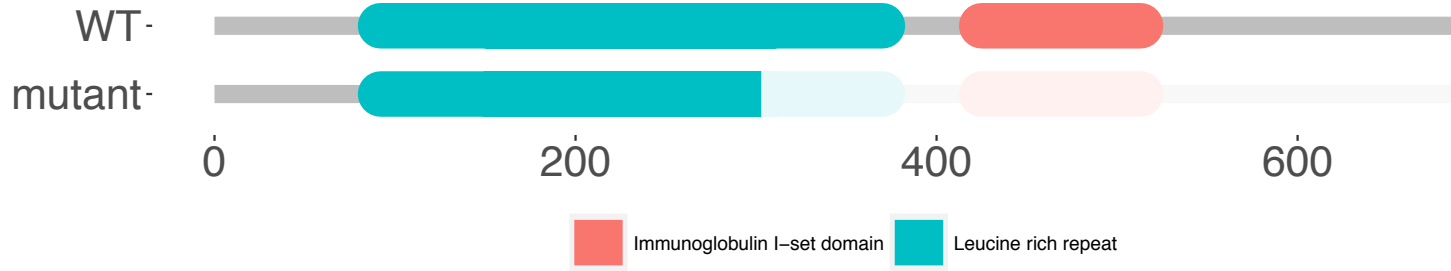

|                |                                                              |      |
|----------------|--------------------------------------------------------------|------|
| XM_005163071.3 | aagccacaaacaacccccgacttttctatattcacccaaatgctttttctcaactcccaa | 1620 |
| NV971          | aagccacaa-----ccccgacttttctatattcacccaaatgctttttctcaactcccaa | 1615 |

|                |                                                              |     |
|----------------|--------------------------------------------------------------|-----|
| XM_005163071.3 | DSFALHNLPELTKIEATNNPRLSYIHPNAFSQLPRLESLMLNSNALRALHHITVESLPNL | 360 |
| NV971          | DSFALHNLPELTKIEATTPTF-LY-SPKCFSTPKTGVLDAE*-----              | 340 |
|                | *****. * *:. * . * : * :                                     |     |

# nfkb1

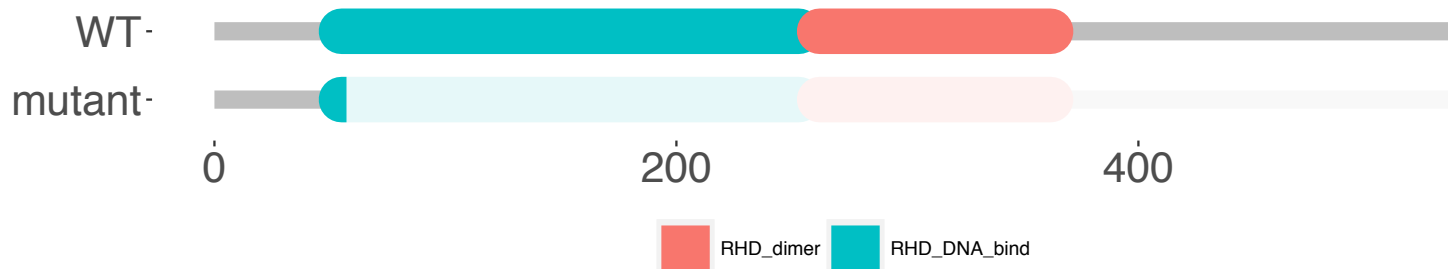

|                |                                                               |     |
|----------------|---------------------------------------------------------------|-----|
| NM_001353873.1 | GCTTACAAATCACAGAACAACCAAAACAGAGGGGCTTCAGGTTCCGCTATGGGTGTGAGG  | 540 |
| NV1244         | GCTTACAAATCACAGAACAACCAAAACAGAGGGGCTTCAGGTTCCGCTGTGAGGGCACGGA | 540 |
|                | ***** ** *                                                    |     |
| NM_001353873.1 | GCCCGT-----CTCACGGAGGGCTTCCAGGGGCTCCAGCGAGAAGAACC GCAAGT      | 591 |
| NV1244         | GGTGTGAGGTGTGAGGGCACGGAGGGCTTCCAGGGGCTCC-----AGCGAG           | 587 |
|                | * *****                                                       |     |
| NM_001353873.1 | CCTACCCACAAGTGCAGATCTGTAATTATCAGGGCCCTGCTCGTGTGGTGGTCCAGCTGG  | 651 |
| NV1244         | AAGAACCACAAGTGCAGATCTGTAATTATCAGGGCCCTGCTCGTGTGGTGGTCCAGCTGG  | 647 |
|                | * *****                                                       |     |
| <br>           |                                                               |     |
| NM_001353873.1 | PKQRGFRFRYRGCEGPSHGGLPGASSEKNRKSYPQVQICNYQGP ARVVVQLVTNSQHPLH | 120 |
| NV1244         | PKQRGFRFRVRARRCEV*-----                                       | 77  |
|                | ***** .. .                                                    |     |

# oxt

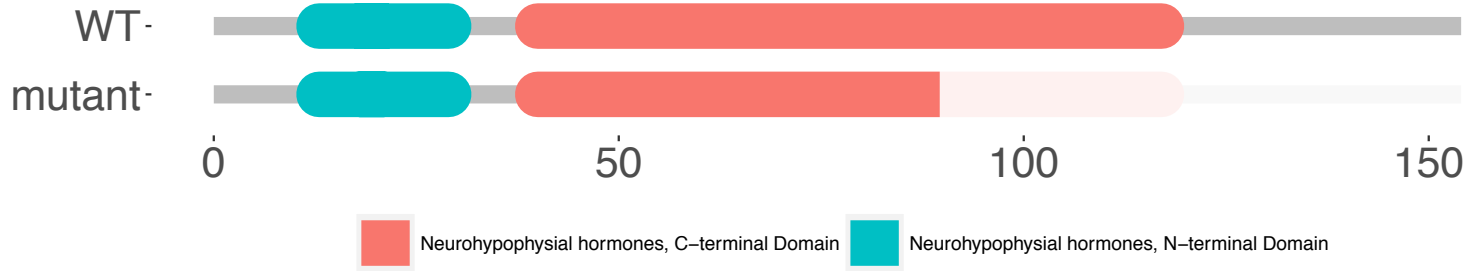

|             |                                                             |     |
|-------------|-------------------------------------------------------------|-----|
| NM_178291.2 | ccttctccgtgtgagatgtctggaaggcctgcggttatgagggacgctgcgctgctcct | 360 |
| NV1081      | ccttctccgtgtgagatgtctggaaggcctgc-----gctgcgctgctcct         | 347 |

|             |                                                              |     |
|-------------|--------------------------------------------------------------|-----|
| NM_178291.2 | GEGIGCLVGSPETLRCLEEDFLPSPCEMSGKACGYEGRCAAPGVCCDSEGCSVDQSCVDG | 120 |
| nv1081      | GEGIGCLVGSPETLRCLEEDFLPSPCEMSGKACAALLLESAATRR-----           | 105 |
|             | *****. :*                                                    |     |

# sapap2

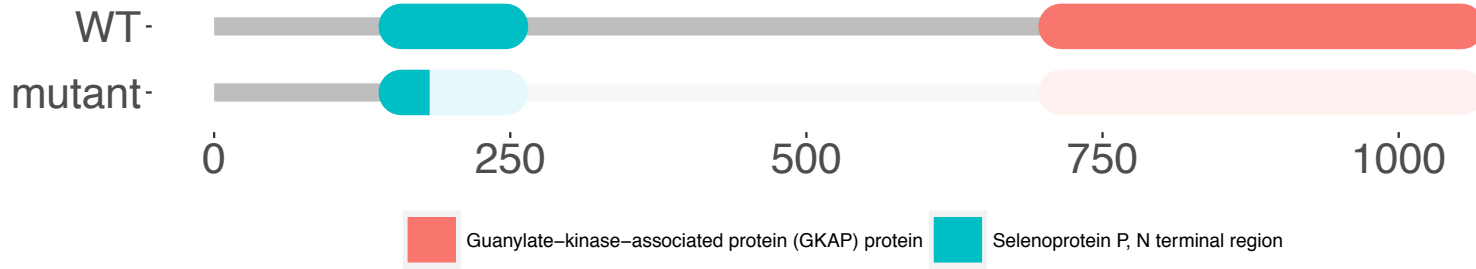

```

XM_680713.7      cttccaagatgaacggcaccaagggagactctcgctcagacagcggacaccaccaccatc      1020
NV1136           cttccaagatgaacggcaccaagggagactctcgctca----gcgacaccaccaccatc      1016
*****

```

```

XM_680713.7      KLF'TKSHSLEGSSKMNGTKGDSRSDSGHHHHHHHHGHGHDHGSHKHSKRKSKERKSDSKQ      240
NV1136           KLF'TKSHSLEGSSKMNGTKGDSRSADTTTITTTIIT-AMTMGATNTANEVRARN---ASQT      236
***** . . * : : : . : : : * :

```

# scn1lab

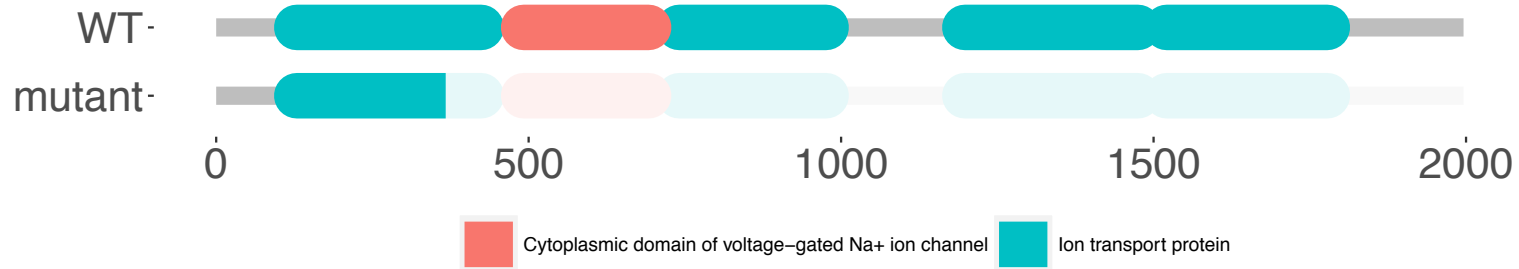

```

XM_005165770.3      tctatctggttaatctcatcctggctgtgggtggccatggcgtatgatgagcagaaccagg      1740
NV978                tctatctggttaatctcatcc----tgtgggtggccatggcgtatgatgagcagaaccagg      1736
*****
                    *****
    
```

```

XM_005165770.3      WAFSLFRLMTQDFWENLYQOTLRAAGKPYMIFFVLVIFLGSFYLVNLILAVVAMAYDEQ      420
NV978                WAFSLFRLMTQDFWENLYQOTLRAAGKPYMIFFVLVIFLGSFYLVNLILWWPWRMMSRT      420
*****
                    ..
    
```

# shank3b

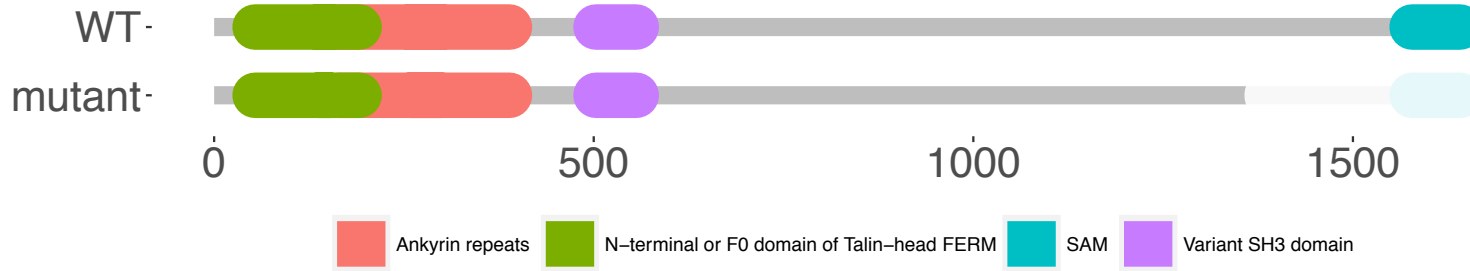

|                |                                                             |      |
|----------------|-------------------------------------------------------------|------|
| XM_009300184.2 | ttccaaactgtggggggaggagccccgggccagatggggtcatcagatgaaagtcggcc | 4440 |
| NV1061         | ttccaaactgtgggg-----gggtcatcagatgaaagtcggcc                 | 4417 |

|                |                                                             |      |
|----------------|-------------------------------------------------------------|------|
| XM_009300184.2 | PRYLFQRRSKLWGEEPRAQMGSSESRPAAMGAELLSKDTHSLGEEPPMGAPLDPGRRSP | 1440 |
| NV1061         | PRYLFQRRSKLWGVIR*-----<br>*****                             | 1396 |



# slc18a2

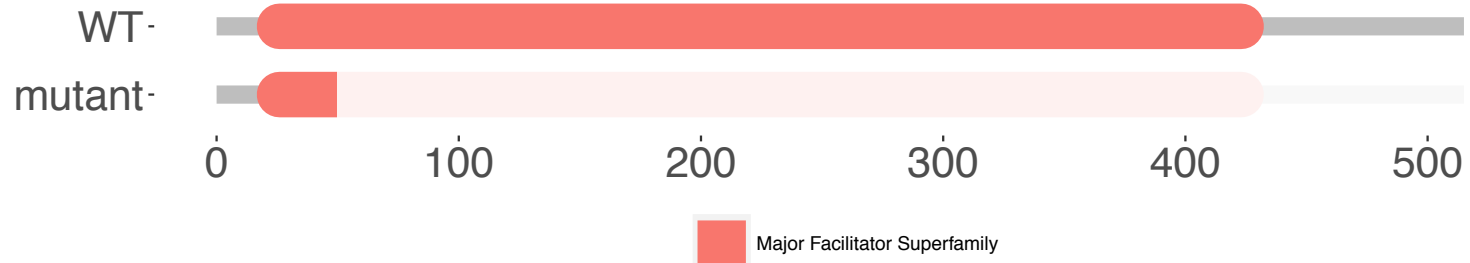

|                |                                                               |     |
|----------------|---------------------------------------------------------------|-----|
| NM_001256225.2 | ggtggacgacgaggctgctcagatggttaagaatcactccatgacccctctttctccatc  | 360 |
| NV1206         | ggtggacgacgaggctgctccatcg-----                                | 325 |
| NM_001256225.2 | gagcacctttcagagcattgtgtctttgtatgacaacaccacacgtgtgacaggcttcag  | 420 |
| NV1206         | -agcacctttcagagcattgtgtctttgtatgacaacacc-----                 | 364 |
| NM_001256225.2 | cccgagatgagcacagctggtccaatgagcctggctcctacttttgtgagccctcaaaa   | 480 |
| NV1206         | -----acacgaa                                                  | 371 |
| NM_001256225.2 | ccagtccgactgtcccaaagcagatgaccagcttctgaacgagaatgtgaaagtgggtct  | 540 |
| NV1206         | ccagtccgactgtcccaaagcagatgaccagcttctgaacgagaatgtgaaagtgggtct  | 431 |
|                |                                                               |     |
| NM_001256225.2 | MGLFDALRDFSLLTWLREERQSRRLILLIVFIALLLDNMLLTVVVPPIIPSYLYTVDDEAA | 60  |
| NV1206         | MGLFDALRDFSLLTWLREERQSRRLILLIVFIALLLDNMLLTVVVPPIIPSYLYTVDDEAA | 60  |
| *****          |                                                               |     |
| NM_001256225.2 | QMVKNHSMTPSPSSTFQSIVSLYDNTTRVTGFSPQMSTAGPMSLAPTFVSPQNQSDCPK   | 120 |
| NV1206         | -----PSSTFQSIVSLYDNTTRTSPTVPKQMTSF*-----                      | 89  |
| *****.: *: *:  |                                                               |     |

# slc1a1

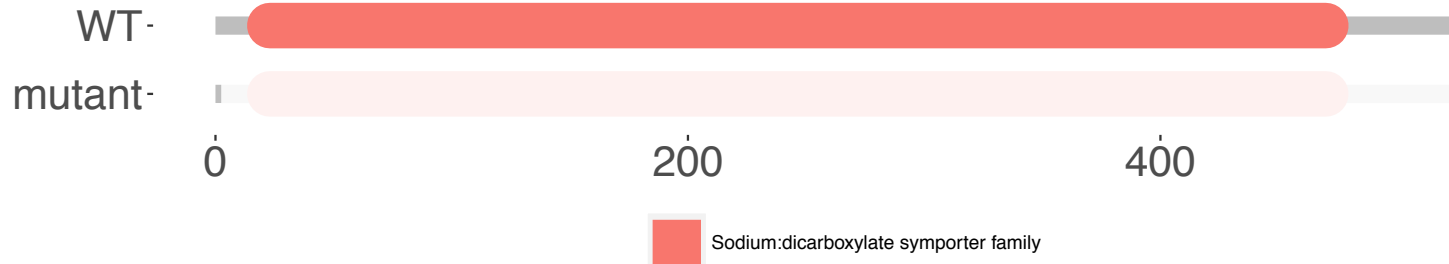

|                |                                                              |     |
|----------------|--------------------------------------------------------------|-----|
| NM_001002666.1 | atgctggggaagaaagagcggagaagcagagatgtgaagggtttgctgaagaggaactgg | 180 |
| NV1211         | atgctggggaagaaagagcggagaagcagag--atgaagggtttgctgaagaggaactgg | 178 |
|                | *****                                                        |     |
| NM_001002666.1 | MEMLGKKERRSRDVKGLLK-----RNWILIATIIAVILGIGLGVVVRDYTSL         | 47  |
| NV1211         | MEMLGKKERRSRDEGFAEEELDSHCNHHC HSGDWSWCG-----GAG--LHLSDPAGE   | 51  |
|                | ***** : * . * * : : * :.                                     |     |

# slc22a15

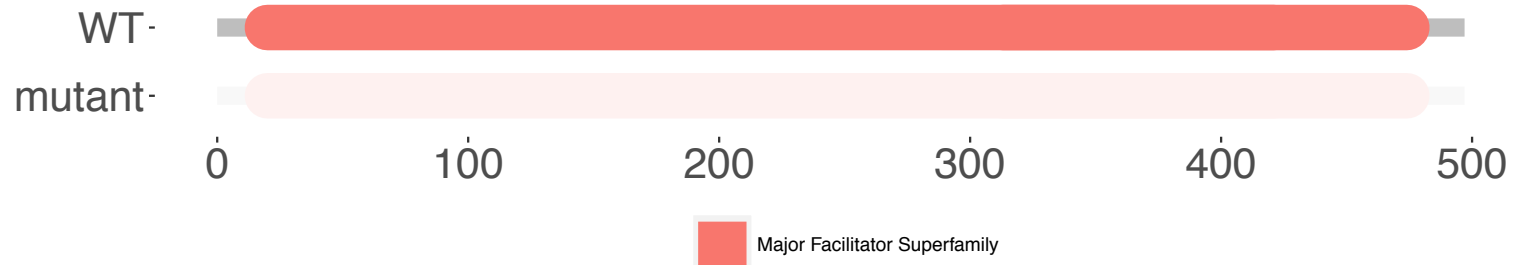

|                |                                                               |     |
|----------------|---------------------------------------------------------------|-----|
| NM_001109699.1 | tctggaatggatttagaggaggctttccaggt-----                         | 152 |
| NV1209         | tctggaatggatttagaggaggctttccaggtTGGAGGATGTTCCAGGATGTTCTCTCTA  | 180 |
| NM_001109699.1 | ---ggttggagagttcgggaagtcaccagaagcgaatgatcacagtgctggtgttcctcca | 209 |
| NV1209         | TCAggttggagagttcgggaagtcaccagaagcgaatgatcacagtgctggtgttcctcca | 240 |
|                |                                                               |     |
| NM_001109699.1 | MDLEEAFQVVGEFGSHQKRMITVLVFLQIYMACQSMLIILVGAVPEYHIEPVTEGVDGDV  | 60  |
| NV1209         | MDLEEAFQVGGCSRMF-----                                         | 16  |
|                | ***** * .                                                     |     |

# slc25a27

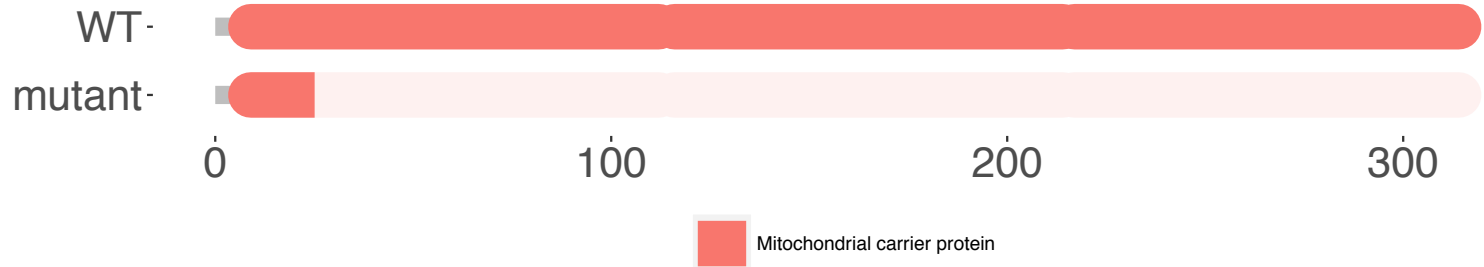

|             |                                                              |     |
|-------------|--------------------------------------------------------------|-----|
| NM_200341.1 | cagaattggtcacattccccctggatcctaccaaaccagactccagatccagggggaag  | 240 |
| NV1195      | cagaattggtcacattTTC-----                                     | 199 |
|             | ***** *                                                      |     |
| NM_200341.1 | gcagatctggaagaatggtggaagcgtacagactcagaaatacaggggcatgttgagca  | 300 |
| NV1195      | -----TGagcgtacagactcagaaatacaggggcatgttgagca                 | 238 |
|             | *****                                                        |     |
| NM_200341.1 | MSHLQENSRWPRVSKFTLSACAAVAELVTFPLDLTKTRLQIQEGRS---GKNNGSV-    | 55  |
| NV1195      | MSHLQENSRWPRVSKFTLSACAAVAELVTFSERTDS---EIQGHVEHSCRYSAARRGALE | 57  |
|             | ***** . :***. . . *::                                        |     |

# slc39a11

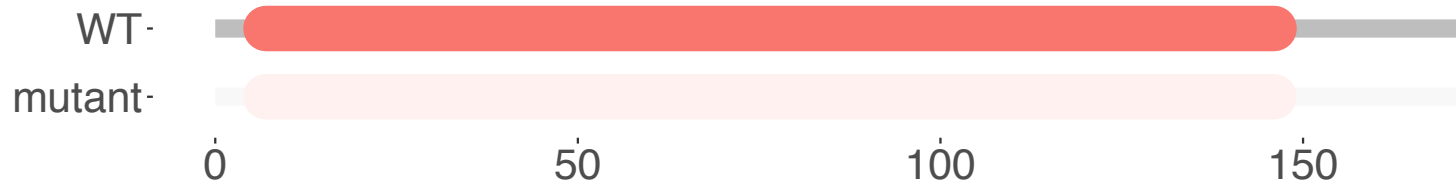

|                |                                                               |     |
|----------------|---------------------------------------------------------------|-----|
| XM_005170120.3 | cacagacacgtgtacaatgcgaagcaggaagttcttcactcggtgctgtaaacaacagc   | 60  |
| NV1200         | cacagacacgtgtacaatgcgaagcaggaagttc-----                       | 34  |
|                | *****                                                         |     |
| XM_005170120.3 | atgtttccaggcctcagtcgcgctggttcaggccctgctggggactctgttcacctgggcg | 120 |
| NV1200         | -----ttcactcgggtgc                                            | 46  |
|                | ***** **                                                      |     |
| XM_005170120.3 | ctgactgcagctggagccgcactggtcttcatcttctccagcagacagaagcggatthtg  | 180 |
| NV1200         | ctg--taaacaacagcatgCTCCACAGTCAAGcttctccagcagacagaagcggatthtg  | 104 |
|                | *** * * ** * * *****                                          |     |
| XM_005170120.3 | -----MFPGL-----SPLVQALLGTLFTWAL                               | 21  |
| NV1200         | MLHSQASPADRSGFWMVAVWDLQQGLCSQPRIGLCWLLLLRWQRNLGNMETLLSSQWLWAL | 60  |
|                | : ** : : : ** . : : **                                        |     |

# slc6a3

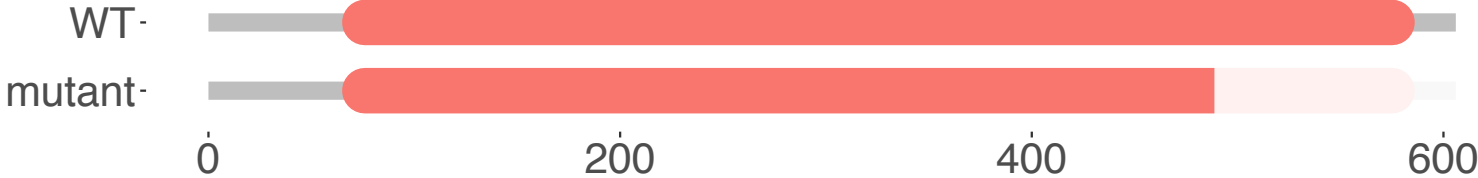

 Sodium:neurotransmitter symporter family

|                       |                                                                                                                                                                                   |              |
|-----------------------|-----------------------------------------------------------------------------------------------------------------------------------------------------------------------------------|--------------|
| NM_131755.1<br>NV1087 | tttacgctgttggaccacttcgctgcggggacgtcaattctctttggagtactaattgag<br>tttacgctgttggaccacttcgctgcggggacgtcaattctctttggagtactaattgag<br>*****                                             | 1500<br>1500 |
| NM_131755.1<br>NV1087 | gccatcggcatcgctggttttacggagtggatcgcttcagtgatgatatcgaggagatg<br>g-----catcgctggttttacggagtggatcgcttcagtgatgatatcgaggagatg<br>*                 *****                               | 1560<br>1553 |
| NM_131755.1<br>NV1087 | FTLLDHFAAGTSILFGVLIEAIGI--AWFYGVDRFSDDIEEMIGQRPGLYWRLCWKFVSP<br>FTLLDHFAAGTSILFGVLIEASPGFTEWIASV-----MISRR*-----<br>*****                             *:. *                 **.:* | 538<br>517   |

# slc6a4a

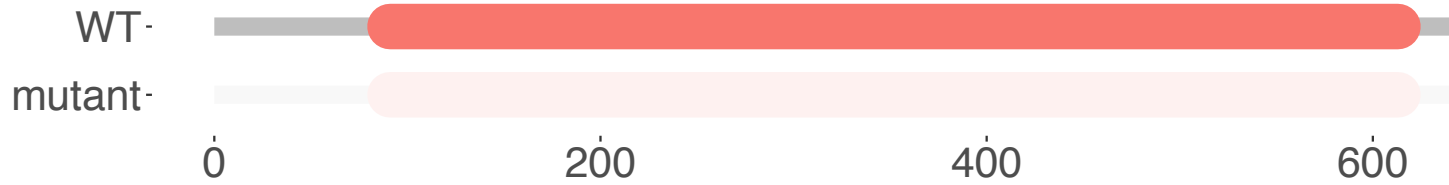

Sodium:neurotransmitter symporter family

|                |                                                              |     |
|----------------|--------------------------------------------------------------|-----|
| XM_009291669.2 | aagagtacgggggagagcagcagaaagtgccggagtctcaagagaacggcaggctggttg | 840 |
| NV1208         | aagag---ggggagagcagcagaaagtgccggagtctcaagagaacggcaggctggttg  | 836 |
|                | *****                                                        |     |

|                |                                                              |    |
|----------------|--------------------------------------------------------------|----|
| XM_009291669.2 | MDMKESMMMNQEYGGEQKVPESQENGRLLVDSVPEKDQKSGSGPGQVSNGYRSTSPQSP  | 60 |
| NV1208         | MDMKESMMMNQEGESSRKCRSLKRTAGWLWIAFR-RRIRNLALGLGKSPMVIHVHLLKAP | 59 |
|                | ***** ..:: .: * * : .: :: . * * : ::*                        |    |

# slc6a8

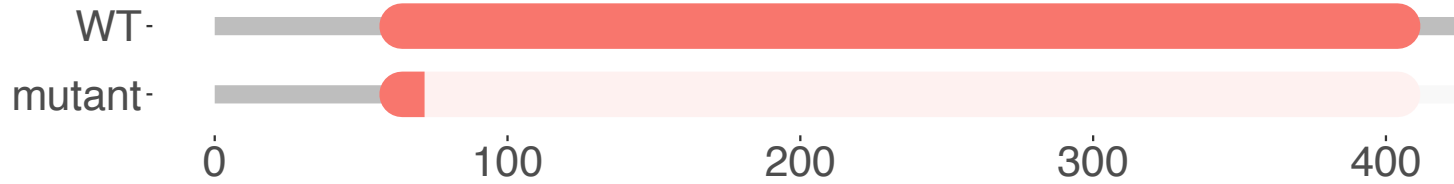

■ Sodium:neurotransmitter symporter family

|                |                                                               |     |
|----------------|---------------------------------------------------------------|-----|
| XM_005166721.2 | aatggaaacgcgcacccaagcgtcaacgggaccctcaacggggggcccatgtcagcggct  | 840 |
| NV1197         | aatggaaacgcgcacccaagcgtcaacgggaccctcaTGTcggggcccatgtcagcggct  | 840 |
|                | *****                                                         |     |
| XM_005166721.2 | accggagccatctcggcggtggagaagaagaggaggctaccccgagcgagagacgtgg    | 900 |
| NV1197         | accggagccatctcggcggtggagaagaagaggaggctaccccgagcgagagacgtgg    | 900 |
|                | *****                                                         |     |
| XM_005166721.2 | accagacagatggacttcatcatgtcctgcgtgggttttgcagtggggctggggaacgtc  | 960 |
| NV1197         | accagacagatggacttcatcatgtcctgcgtgggtttt-----ggggaacgtc        | 950 |
|                | *****                                                         |     |
| XM_005166721.2 | MEKSSLDADCCALNMVLVEEKKGHLIPNGNAHPSVNGTLNGGPMSAATGAISAVEKKREG  | 60  |
| NV1197         | MEKSSLDADCCALNMVLVEEKKGHLIPNGNAHPSVNGTLMMSGPMSAATGAISAVEKKREG | 60  |
|                | *****                                                         |     |
| XM_005166721.2 | YPERETWTRQMDFIMSCVGFVAVGLGNVWRFPYLCYKNGGGVFLIPYVLFIFLGGIPIFFL | 120 |
| NV1197         | YPERETWTRQMDFIMSCVGFVAVGLGNVWRFPYLCYKNGGGVFLIPYVLFIFLGGIPIFFL | 109 |
|                | *****                                                         |     |
| XM_005166721.2 | EIALGQFMKAGSINVVNIAPLFLKGLGYASMVIVFFCNTYYIMVLAWGFYYFIKSFNATLP | 180 |
| NV1197         | -----EAFRYSSWRL-----RWD-----                                  | 122 |
|                | :* . *.: *.                                                   |     |



srr

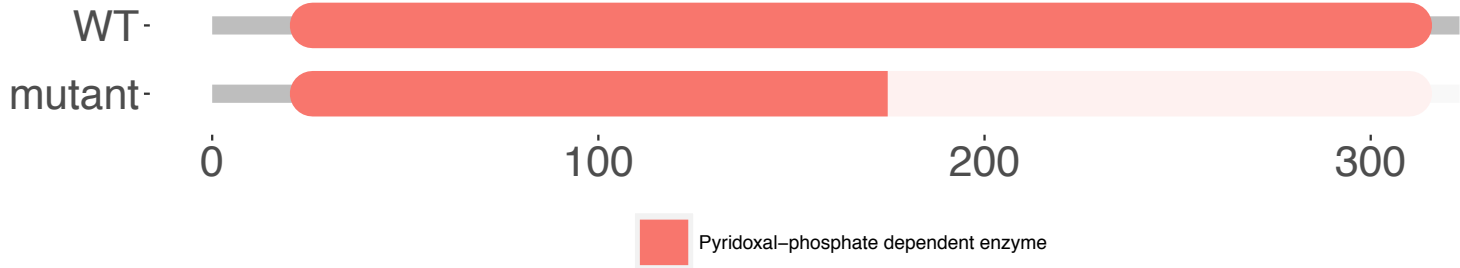

```
XM_002661465.4    gacattccagcttaggtttggagatcctggatgctcgtaccctatccagatgtggtggttg    660  
NV1157            gacattccagcttaggtttggagatcctggatgctcgtaccctatccagatgtggtggttg    660  
*****  
XM_002661465.4    tttgctgtggtggtggagggttactttctgggtgtggccgctgccatcaaactgtctggtt    720  
NV1157            t-----tactttctgggtgtggccgctgccatcaaactgtctggtt    700  
*                          *****  
  
XM_002661465.4    NLGVEEVERVPTTQLMGVVNRCVQEDGMTFLHSIDDPDLIAGHSSLGFEILDVVPYPDVVV    180  
NV1157            NLGVEEVERVPTTQLMGVVNRCVQEDGMTFLHSIDDPDLIAGHSSLGFEILDVVPYPDVVV    180  
*****  
XM_002661465.4    VCCGGGGLLSGVAAAIKLSGCEDTKIYGVEPEGACTMYKSFIEKRPVGMDAKSIASGLAP    240  
NV1157            VTFWCGRCHQTVWL*-----  
*      *      .      *
```

# tph2

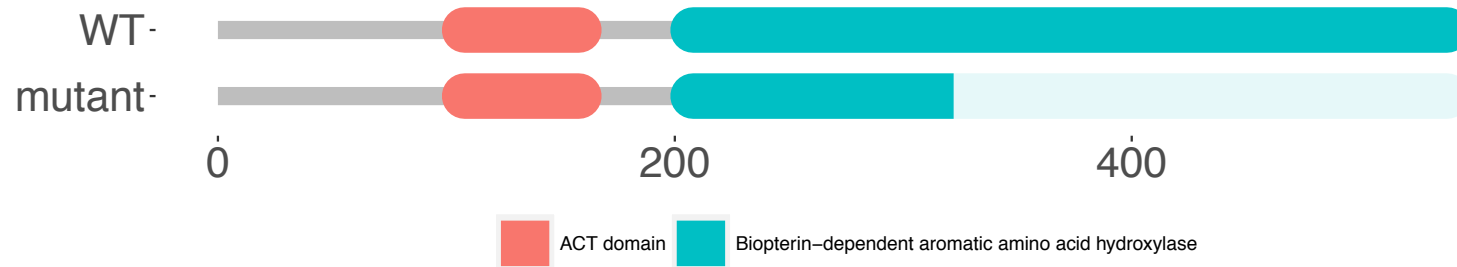

```
NM_001310068.1    aaggcctgtggctggatatctctcaccacgagacttcctggctggactggcttatcgagt    1140
NV1089            aaggcctgt-gctggatatctctcaccacgagacttcctggctggactggcttatcgagt    1139
```

```
NM_001310068.1    LLTKHCGYREDNIPQLEDVSLFLRERSGFTVRPVAGYLSPRDFLAG-LAYRVFNCTQYIR    359
NV1089            LLTKHCGYREDNIPQLEDVSLFLRERSGFTVRPVLDISHHETSWLDWLIIECLIALSIYVT    360
*****          .      .      . *    ::  : *:
```

# ube3a

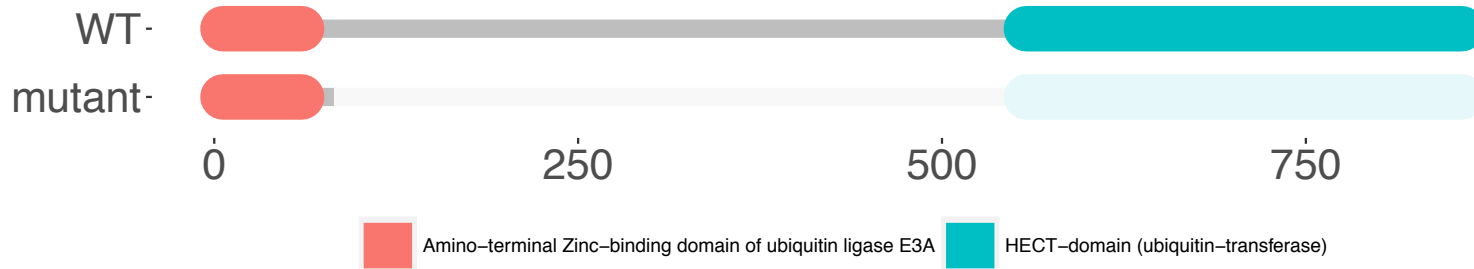

|                |                                                             |     |
|----------------|-------------------------------------------------------------|-----|
| NM_001007318.1 | ggacctgccaccacaaggaggactttagagatctgaatttcttgactgaggataaggt  | 540 |
| NV1064         | ggacctgccaccac-----aggactttagagatctgaatttcttgactgaggataaggt | 535 |

|                |                                                               |     |
|----------------|---------------------------------------------------------------|-----|
| NM_001007318.1 | DPHPSKKGASSAFPENSAKGAHNFSACSNKGKMNHKDLPPTREDFRDLNFLTEDKVYEILS | 120 |
| NV1064         | DPHPSKKGASSAFPENSAKGAHNFSACSNKGKMNHKDLPPTGL*-----             | 102 |
|                | *****                                                         |     |

| Unpolarized  | Kullback–Leibler divergence | Polarized    | Kullback–Leibler divergence |
|--------------|-----------------------------|--------------|-----------------------------|
| 'immp2lHO'   | Inf                         | 'immp2lHO'   | Inf                         |
| 'slc18a2HT'  | 0.503872588                 | 'adra1aaHO'  | 0.408321982                 |
| 'scn1abHT'   | 0.475243162                 | 'slc25a27HO' | 0.401431298                 |
| 'slc6a4aHO'  | 0.450082277                 | 'drd4-rsHO'  | 0.380778006                 |
| 'drd4-rsHO'  | 0.372634411                 | 'chrna2aHO'  | 0.352634968                 |
| 'disc1KO'    | 0.361275622                 | 'slc18a2HT'  | 0.335771101                 |
| 'drd4aHO'    | 0.360377693                 | 'disc1KO'    | 0.317098761                 |
| 'slc1a1HO'   | 0.344640154                 | 'homer1bHO'  | 0.307501307                 |
| 'slc6a8HO'   | 0.332613849                 | 'slc6a8HO'   | 0.242433203                 |
| 'homer1bHO'  | 0.328809872                 | 'drd4aHO'    | 0.232985499                 |
| 'chrna2aHO'  | 0.256689064                 | 'scn1abHT'   | 0.229660386                 |
| 'chrom4aHO'  | 0.254995398                 | 'gnrhr4HO'   | 0.229206427                 |
| 'gnrhr4HO'   | 0.249192827                 | 'oxtKO'      | 0.170716837                 |
| 'adra1aaHO'  | 0.245908343                 | 'drd2bKO'    | 0.165339327                 |
| 'slc6a3KO'   | 0.239132287                 | 'slc6a4aHO'  | 0.135011208                 |
| 'adra1abHO'  | 0.22832634                  | 'slc1a1HO'   | 0.124852827                 |
| 'drd2bKO'    | 0.223290031                 | 'esr2aHO'    | 0.115764118                 |
| 'sapap2KO'   | 0.215181308                 | 'chrom4aHO'  | 0.115151629                 |
| 'esr2aHO'    | 0.2130425                   | 'srrHO'      | 0.099703579                 |
| 'dlg4aHO'    | 0.210317791                 | 'dlg4aHO'    | 0.097755979                 |
| 'chd8KO_WT'  | 0.189007333                 | 'drd3HO'     | 0.088199216                 |
| 'tph2HO'     | 0.188094395                 | 'slc22a15HO' | 0.079772629                 |
| 'srrHO'      | 0.186947659                 | 'slc39a11HO' | 0.070391332                 |
| 'slc25a27HO' | 0.185835058                 | 'KCTD13KO'   | 0.065474473                 |
| 'nfkb1HO'    | 0.180801278                 | 'sapap2KO'   | 0.064423091                 |
| 'oxtKO'      | 0.177612315                 | 'drd1bHO'    | 0.053110873                 |
| 'shank3bKO'  | 0.16671958                  | 'lrrn3KO'    | 0.052257913                 |
| 'drd3HO'     | 0.161913606                 | 'adra1abHO'  | 0.045964875                 |
| 'drd1bHO'    | 0.099974442                 | 'shank3bKO'  | 0.045234588                 |
| 'slc22a15HO' | 0.049265198                 | 'nfkb1HO'    | 0.035939197                 |
| 'grm5aHO'    | 0.035304671                 | 'slc6a3KO'   | 0.031863257                 |
| 'slc39a11HO' | 0.030706812                 | 'tph2HO'     | 0.030858559                 |
| 'KCTD13KO'   | 0.021098744                 | 'grm5aHO'    | 0.018200187                 |
| 'ube3aKO'    | 0.017664977                 | 'ube3aKO'    | 0.006102855                 |
| 'lrrn3KO'    | 0.013683683                 | 'chd8KO_WT'  | 0.00384635                  |
| 'WT'         | 0                           | 'WT'         | 0                           |
